# Supplementary material
Source: PubMed Central journal article supplement (PMC2790819)

# Synthesis of (–)-Berkelic Acid

Xiaoxing Wu, Jingye Zhou, and Barry B. Snider\*

Department of Chemistry MS 015, Brandeis University, Waltham, MA 02454-9110, USA

|                                                                                                                                                                                         |         |
|-----------------------------------------------------------------------------------------------------------------------------------------------------------------------------------------|---------|
| Experimental Procedures .....                                                                                                                                                           | S2-S26  |
| <b>Table S1.</b> Comparison of the $^1\text{H}$ NMR Spectral Data Reported for Berkelic Acid Methyl Ester in $\text{CDCl}_3$ with Those of Intermediates <b>22</b> and <b>27a</b> ..... | S27     |
| <b>Table S2.</b> Comparison of the $^1\text{H}$ NMR Spectral Data Reported for Berkelic Acid in $\text{CDCl}_3$ with Those of <b>35</b> and <b>36</b> .....                             | S28     |
| <b>Table S3.</b> Comparison of the $^1\text{H}$ NMR Spectral Data Reported for Berkelic Acid in $\text{CD}_3\text{OD}$ with Those of <b>35</b> and <b>36</b> .....                      | S29     |
| <b>Table S4.</b> Comparison of the $^{13}\text{C}$ NMR Spectral Data Reported for Berkelic Acid in $\text{CDCl}_3$ with Those of <b>35</b> and <b>36</b> .....                          | S30     |
| <b>Table S5.</b> Comparison of the $^{13}\text{C}$ NMR Spectral Data Reported for Berkelic Acid in $\text{CD}_3\text{OD}$ with Those of <b>35</b> and <b>36</b> .....                   | S31     |
| Discussion of the Preparation and Stereochemical Assignment of Citronellal-derived Hydroxy Esters <b>41-44</b> .....                                                                    | S32-S34 |
| <b>Table S6.</b> Comparison of the $^{13}\text{C}$ and $^1\text{H}$ NMR Spectral Data Reported for Citronellal-derived Hydroxy Esters <b>41-44</b> .....                                | S35     |
| <b>Table S7.</b> Comparison of the $^{13}\text{C}$ and $^1\text{H}$ NMR Spectral Data Reported for Berkelic Acid Intermediates <b>33</b> and <b>34</b> .....                            | S36     |
| Copies of $^1\text{H}$ and $^{13}\text{C}$ NMR Spectra .....                                                                                                                            | S37-S63 |

## Experimental Section

**General procedures.** NMR spectra were recorded at 400 MHz in CDCl<sub>3</sub> with TMS as an internal standard unless otherwise indicated. Chemical shifts are reported in  $\delta$ , coupling constants in Hz, and IR spectra in cm<sup>-1</sup>. Spectra in CD<sub>3</sub>OD are referenced to the residual solvent peaks at  $\delta$  3.30 (<sup>1</sup>H) and  $\delta$  49.00 (<sup>13</sup>C) to be consistent with the data for the natural product.<sup>[1]</sup> Spectra in acetone-*d*<sub>6</sub> are referenced to the residual solvent peaks at  $\delta$  2.05 (<sup>1</sup>H). Spectra in benzene-*d*<sub>6</sub> are referenced to the residual solvent peaks at  $\delta$  7.16 (<sup>1</sup>H) and  $\delta$  128.39 (<sup>13</sup>C). The atom numbering used in the tabulation of all tetracyclic compounds (**22**, **27-30**, **S4-S5**, **33-36**) is that used in the isolation of berkelic acid<sup>[1]</sup> rather than that of the systematic name given in the procedure heading.

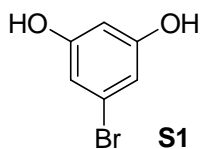

**5-Bromoresorcinol (S1)** was prepared by the literature procedure.<sup>[9]</sup> To a solution of 1-bromo-3,5-dimethoxybenzene (**13**, 2 g, 9.2 mmol) in dry CH<sub>2</sub>Cl<sub>2</sub> (25 mL) was added BBr<sub>3</sub> solution (19 mL, 1 M in CH<sub>2</sub>Cl<sub>2</sub>, 19 mmol) by syringe over 30 min under N<sub>2</sub> at -78 °C. The reaction mixture was stirred from -78 to 25 °C overnight. The brown solution was cooled to 0 °C and H<sub>2</sub>O (50 mL) was added slowly. The aqueous layer was saturated with solid NaCl. The two layers were separated and the aqueous layer was extracted with EtOAc (4 × 50 mL). The combined organic layers were dried (MgSO<sub>4</sub>) and concentrated under reduced pressure. Flash chromatography on silica gel (4:1 hexanes/EtOAc) gave 1.69 g (97%) of **S1** as a white solid: mp 86-87 °C (lit.<sup>[10a]</sup> mp 85-86.4 °C); <sup>1</sup>H NMR (acetone-*d*<sub>6</sub>) 8.72 (s, 2, OH), 6.52 (d, 2, *J* = 2.1), 6.33 (t, 1, *J* = 2.1). The <sup>1</sup>H NMR (acetone-*d*<sub>6</sub>) spectral data are identical to the literature data.<sup>[10a]</sup>

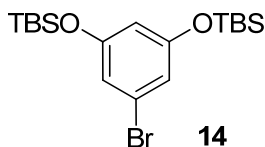

**1-Bromo-3,5-bis[(1,1-dimethylethyl)dimethylsilyloxy]-benzene (14).** A solution of **S1** (1.69 g, 8.94 mmol), imidazole (1.4 g, 20.6 mmol), and *tert*-butyldimethylsilyl chloride (2.83 g, 18.8 mmol) in anhydrous DMF (20 mL) was stirred under N<sub>2</sub> at 25 °C overnight. H<sub>2</sub>O (20 mL) was added and the aqueous layer was extracted with CH<sub>2</sub>Cl<sub>2</sub> (3 × 20 mL). The combined extracts were dried (MgSO<sub>4</sub>) and concentrated to yield 3.70 g of crude **14**. Flash chromatography on silica gel (hexanes) gave 3.50 g (94%) of **14** as a colorless liquid: <sup>1</sup>H NMR 6.63 (d, 2, *J* = 2.1), 6.25 (t, 1, *J* = 2.1), 0.97 (s, 18), 0.19 (s, 12); <sup>13</sup>C NMR 157.1 (2 C), 122.2, 116.9 (2 C), 111.1, 25.6 (6 C), 18.2 (2 C), -4.5 (4 C). After correction for improper referencing in the literature (TBS methyl group rather than TMS) our spectral data correspond to those reported.<sup>[11]</sup>

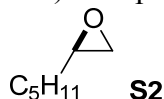

**(2R)-(+)-2-Pentyloxirane (S2).** To a mixture of (1*R*,2*R*)-(-)-*N,N'*-bis(3,5-di-*t*-butylsalicylidene)-1,2-cyclohexanediaminocobalt (II) (26 mg, 43 μmol, 0.005 equiv) and (±)-2-pentyloxirane (1.2 mL, 8.8 mmol) was added AcOH (18 μL, 189 μmol, 0.02 equiv), THF (100 μL, 1.23 mmol), and H<sub>2</sub>O (86 μL, 4.8 mmol, 0.55 equiv) at 0 °C. The orange suspension warmed to 25 °C and stirred for 24 h. Flash chromatography on silica gel (30:1 pentane/ether) gave 376 mg (38%) of (2*R*)-(+)-2-pentyloxirane (**S2**) as a colorless liquid: [α]<sub>D</sub><sup>22</sup> +9.7 (*c* 1.92, CHCl<sub>3</sub>); {lit.<sup>[3]</sup> for the enantiomer: [α]<sub>D</sub><sup>21</sup> - 10.6 (*c* 0.99, CHCl<sub>3</sub>)}; <sup>1</sup>H NMR 2.94-2.88 (m, 1), 2.75 (dd, 1, *J* = 4.9, 4.3), 2.47 (dd, 1, *J* = 4.9, 2.4), 1.57-1.40 (m, 4), 1.39-1.27 (m, 4), 0.90 (t, 3, *J* = 6.7). The <sup>1</sup>H NMR spectral data are identical to the literature data.<sup>[3]</sup>

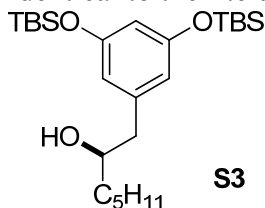

**(α*R*)-3,5-Bis[(1,1-dimethylethyl)dimethylsilyloxy]-α-pentylbenzeneethanol (S3).** Bromobenzene **14** (427 mg, 1.02 mmol) in a flask was flame-dried under vacuum and dry THF (5 mL) was added. To the above solution was added *t*-BuLi (1.5 mL, 1.5 M in pentane, 2.25 mmol) over 5 min under N<sub>2</sub> at -78 °C and the solution was stirred at -78 °C for 30 min. (*R*)-

(+)-2-pentyloxirane (140 mg, 1.23 mmol) was added dropwise at -78 °C and the solution was stirred at -78 °C for 30 min and at -25 °C for 18 h. The resulting solution was warmed to 25 °C and quenched with saturated NH<sub>4</sub>Cl (5 mL). The phases were separated and the aqueous layer was extracted with ether (3 × 10 mL). The combined organic layers were dried (Na<sub>2</sub>SO<sub>4</sub>) and concentrated to yield 459.7 mg of crude **S3**. Flash chromatography on silica gel (80:1 to 30:1 hexanes/EtOAc) gave 340.7 mg (74%) of **S3** as a colorless liquid:  $[\alpha]_D^{22}$  -4.7 (*c* 2.65, CHCl<sub>3</sub>); <sup>1</sup>H NMR 6.33 (s, 2), 6.22 (s, 1), 3.79-3.70 (m, 1), 2.70 (dd, 1, *J* = 13.4, 4.3), 2.52 (dd, 1, *J* = 13.4, 7.9), 1.55 (d, 1, *J* = 3.7, OH), 1.54-1.21 (m, 8), 0.97 (s, 18), 0.89 (t, 3, *J* = 6.7), 0.19 (s, 12); <sup>13</sup>C NMR 156.6 (2 C), 140.4, 114.5 (2 C), 110.3, 72.5, 44.1, 36.6, 31.9, 25.7 (6 C), 25.4, 22.6, 18.2 (2 C), 14.1, -4.4 (4 C); IR (neat) 3373, 2957, 2931, 2859, 1588; HRMS (EI) calcd for C<sub>25</sub>H<sub>48</sub>O<sub>3</sub>Si<sub>2</sub> (M<sup>+</sup>) 452.3142, found 452.3142.

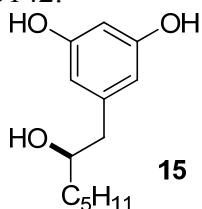

**5-(2R)-2-Hydroxyheptyl-1,3-benzenediol (15)**. A solution of **S3** (892.2 mg, 1.97 mmol) in EtOH (25 mL) was treated with KOH (441 mg, 7.88 mmol) under N<sub>2</sub>. The solution was heated at 55 °C for 8 h. EtOH was evaporated under reduced pressure and brine (10 mL) was added. The aqueous layer was extracted with EtOAc (3 × 15 mL). The combined organic layers were dried (Na<sub>2</sub>SO<sub>4</sub>) and concentrated to yield 622 mg of crude **15**. Flash chromatography on silica gel (3:2 hexanes/EtOAc) gave 352.1 mg (80%) of pure **15**: mp 142-143 °C (lit.<sup>[3]</sup> mp 141.2-142.3 °C);  $[\alpha]_D^{22}$  +4.1 (*c* 2.20, EtOH); {lit.<sup>[3]</sup>  $[\alpha]_D^{21}$  +4.3 (*c* 2.21, EtOH)}; <sup>1</sup>H NMR (acetone-*d*<sub>6</sub>) 8.09 (s, 2, OH), 6.22 (s, 2), 6.19 (s, 1), 3.77-3.68 (m, 1), 3.43 (d, 1, *J* = 4.9, OH), 2.56 (dd, 1, *J* = 13.4, 6.7), 2.54 (dd, 1, *J* = 13.4, 6.1), 1.55-1.20 (m, 8), 0.87 (t, 3, *J* = 7.0). The <sup>1</sup>H NMR (acetone-*d*<sub>6</sub>) spectral data are identical to the literature data.<sup>[3]</sup>

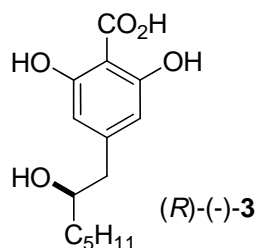

**2,6-Dihydroxy-4-[(2R)-2-hydroxyheptyl]benzoic Acid ((R)-(-)-3).** A mixture of **15** (60 mg, 267  $\mu$ mol) and  $\text{KHCO}_3$  (133 mg, 1.33 mmol) in dry glycerol (0.21 mL) was stirred under  $\text{CO}_2$  (1 atm) at 150  $^\circ\text{C}$  for 5 h. After cooling,  $\text{H}_2\text{O}$  (6.7 mL) and  $\text{KHCO}_3$  (645 mg) were added and the mixture was extracted with ether ( $3 \times 6.7$  mL). The aqueous layer was acidified with 10% HCl to pH 1 and extracted with EtOAc ( $3 \times 11$  mL). The combined EtOAc layers were washed with brine ( $3 \times 6.7$  mL), dried ( $\text{MgSO}_4$ ), and concentrated to yield 42.1 mg (59%) of pure (R)-(-)-3. mp 127-129  $^\circ\text{C}$  (lit.<sup>[3]</sup> mp 127-130  $^\circ\text{C}$ );  $[\alpha]_{\text{D}}^{22} -8.3$  ( $c$  1.29, EtOH); {lit.<sup>[3]</sup>  $[\alpha]_{\text{D}}^{21} -8.4$  ( $c$  1.02, EtOH)};  $^1\text{H}$  NMR (acetone- $d_6$ ) 7.50-6.60 (br, 2, OH), 6.35 (s, 2), 3.84-3.75 (m, 1), 2.64 (dd, 1,  $J = 13.4, 5.5$ ), 2.60 (dd, 1,  $J = 13.4, 7.3$ ), 1.57-1.19 (m, 8), 0.87 (t, 3,  $J = 6.7$ ). The  $^1\text{H}$  NMR (acetone- $d_6$ ) spectral data are identical to the literature data.<sup>[3]</sup>

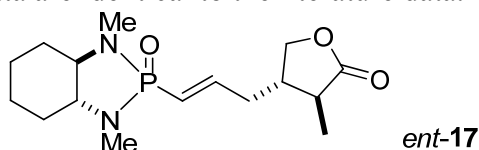

**(3S,4S)-Dihydro-4-[(2E)-3-[(3aR,7aR)-octahydro-1,3-dimethyl-2-oxido-1H-1,3,2-benzodiazaphosphol-1-yl]phosphinyl]-2-propen-1-yl]-3-methyl-2(3H)-furanone (*ent*-17).** To a solution of (R,R)-allyl phosphonamide *ent*-16<sup>[14]</sup> (400 mg, 1.75 mmol) in THF (12 mL) was added *n*-BuLi (1.32 mL, 1.6 M in hexane, 2.11 mmol) by syringe over 5 min at -100  $^\circ\text{C}$  under  $\text{N}_2$ . The solution was stirred at this temperature for 10 min and at -78  $^\circ\text{C}$  for another 10 min. The solution was recooled to -100  $^\circ\text{C}$  and 2-butenolide (156  $\mu$ L, 2.11 mmol) was added dropwise. The mixture was stirred at -100  $^\circ\text{C}$  for 10 min and -78  $^\circ\text{C}$  for another 30 min. MeI (0.8 mL, 12.4 mmol) was added over 5 min at -78  $^\circ\text{C}$ . The solution was stirred from -78 to 25  $^\circ\text{C}$  for 4 h and quenched with saturated  $\text{NH}_4\text{Cl}$  (10 mL). The two layers were separated and the aqueous layer was extracted with EtOAc ( $3 \times 10$  mL). The combined organic layers were dried ( $\text{MgSO}_4$ )

and concentrated to yield 580 mg of crude *ent*-**17**. Flash chromatography on silica gel (100:5:1 EtOAc/MeOH/Et<sub>3</sub>N) gave 415 mg (73%) of *ent*-**17** with >95:5 diastereoselectivity as determined by <sup>1</sup>H NMR spectroscopy: [ $\alpha$ ]<sub>D</sub><sup>22</sup> – 29.6 (*c* 2.01, CHCl<sub>3</sub>); <sup>1</sup>H NMR 6.72-6.57 (m, 1), 5.58 (dd, 1, *J* = 16.8, 20.5), 4.40 (dd, 1, *J* = 6.7, 9.1), 3.84 (dd, 1, *J* = 8.0, 9.1), 2.81-2.72 (m, 1), 2.63-2.23 (m, 5), 2.51 (d, 3, *J* = 12.2), 2.48 (d, 3, *J* = 12.2), 2.08-1.79 (m, 4), 1.41-1.20 (m, 3), 1.29 (d, 3, *J* = 6.7), 1.41-1.03 (m, 1); <sup>13</sup>C NMR 179.0, 148.2 (d, *J* = 3.1), 123.0 (d, *J* = 151), 70.5, 64.5 (d, *J* = 7.6), 63.6 (d, *J* = 5.3), 42.3, 39.9, 36.2 (d, *J* = 19.8), 28.62-28.47 (2 C doublets), 28.0, 27.9, 24.1, 24.0, 14.0; IR (neat) 3445, 2935, 1777, 1770, 1633; HRMS (ES) calcd for C<sub>16</sub>H<sub>28</sub>N<sub>2</sub>O<sub>3</sub>P (MH<sup>+</sup>) 327.1838, found 327.1842.

An identical reaction with (*S,S*)-allyl phosphonamide **16** afforded **17**.

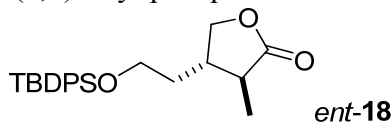

**(3*S*,4*S*)-Dihydro-4-[2-[(1,1-dimethylethyl)diphenylsilyloxy]ethyl]-3-methyl-2(3*H*)-furanone (*ent*-**18**)**. Ozone was bubbled through a solution of *ent*-**17** (830 mg, 2.55 mmol) in MeOH/CH<sub>2</sub>Cl<sub>2</sub> (1:1, 50 mL) at -78 °C for a period of 20 min until the appearance of a persistent blue color. The excess ozone was replaced with oxygen (10 min) followed by nitrogen (30 min). NaBH<sub>4</sub> (670 mg, 17.2 mmol) was added and the solution was stirred from -78 to 25 °C for 3 h. The solvents were evaporated under reduced pressure at 25 °C and water (10 mL) was added to the residue. The aqueous solution was acidified with 10% HCl, saturated with solid NaCl, and extracted with CH<sub>2</sub>Cl<sub>2</sub> (4 × 15 mL). The combined organic extracts were dried (MgSO<sub>4</sub>) and concentrated to yield 445 mg of crude alcohol without further purification.

A solution of the above crude alcohol, imidazole (274 mg, 4.02 mmol), and TBDPSCl (0.97 mL, 3.79 mmol) in CH<sub>2</sub>Cl<sub>2</sub> (25 mL) was stirred at 25 °C for 12 h under N<sub>2</sub>. Saturated NH<sub>4</sub>Cl (10 mL) and H<sub>2</sub>O (10 mL) were added. The two layers were separated and the aqueous layer was extracted with CH<sub>2</sub>Cl<sub>2</sub> (3 × 20 mL). The combined organic layers were dried (Na<sub>2</sub>SO<sub>4</sub>) and concentrated under reduced pressure. Flash chromatography on silica gel (15:1 hexanes/EtOAc) 510.6 mg (52%) of *ent*-**18** as a colorless oil: [ $\alpha$ ]<sub>D</sub><sup>22</sup> – 15.5 (*c* 2.73, CHCl<sub>3</sub>); <sup>1</sup>H

NMR 7.64 (d, 4,  $J = 7.3$ ), 7.47-7.36 (m, 6), 4.43 (dd, 1,  $J = 9.1, 7.9$ ), 3.85 (dd, 1,  $J = 9.1, 8.1$ ), 3.74-3.64 (m, 2), 2.34-2.22 (m, 1), 2.27-2.14 (m, 1), 1.90-1.80 (m, 1), 1.65-1.55 (m, 1), 1.23 (d, 3,  $J = 6.7$ ), 1.06 (s, 9);  $^{13}\text{C}$  NMR 179.5, 135.4 (4 C), 133.2, 133.1, 129.80, 129.78, 127.7 (4 C), 72.0, 62.0, 41.9, 40.2, 34.6, 26.8 (3 C), 19.0, 13.7; IR (neat) 2933, 2859, 1779; HRMS (Q-tof) calcd for  $\text{C}_{23}\text{H}_{30}\text{O}_3\text{SiNa}$  ( $\text{MNa}^+$ ) 405.1862, found 405.1871.

An identical reaction with **17** afforded **18**.

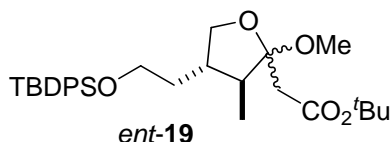

**1,1-Dimethylethyl (3*S*,4*S*)-4-[2-[(1,1-Dimethylethyl)diphenylsilyloxy]ethyl]-tetrahydro-2-methoxyl-3-methyl-2-furanacetate (*ent*-**19**).** To a solution of *tert*-butyl acetate (258  $\mu\text{L}$ , 1.91 mmol) in THF (6 mL) was added LHMDS (1.90 mL, 1 M in THF, 1.90 mmol) over 5 min at  $-78^\circ\text{C}$  under  $\text{N}_2$ . The solution was stirred for 1 h at this temperature and a solution of *ent*-**18** (122.2 mg, 0.32 mmol) in THF (3 mL) was added dropwise by cannula to the reaction mixture. The reaction was stirred from  $-78$  to  $25^\circ\text{C}$  for 3 h and quenched with saturated  $\text{NH}_4\text{Cl}$  (8 mL). The two layers were separated and the aqueous layer was extracted with ether ( $3 \times 10$  mL). The combined organic layers were dried ( $\text{MgSO}_4$ ) and concentrated to give 195.4 mg of crude adducts.

A solution of the crude adducts in anhydrous MeOH (12 mL) was treated with Dowex 50WX8-400- $\text{H}^+$  ion exchange resin (18 mg) at  $25^\circ\text{C}$ . The reaction was stirred at  $25^\circ\text{C}$  for 12 h. The reaction mixture was filtered through Celite to remove the catalyst and the filtrate was concentrated at  $25^\circ\text{C}$  to give 137.6 mg of crude *ent*-**19**. Flash chromatography on MeOH-deactivated silica gel (50:1 hexanes/EtOAc) gave 128.3 mg (78%) of 90% pure *ent*-**19** (mainly one diastereomer of unknown stereochemistry at the ketal carbon) as a colorless oil:  $[\alpha]_{\text{D}}^{22} - 36.2$  ( $c$  2.20,  $\text{CHCl}_3$ );  $^1\text{H}$  NMR 7.65 (d, 4,  $J = 6.7$ ), 7.46-7.34 (m, 6), 3.97 (dd, 1,  $J = 8.5, 7.9$ ), 3.69-3.56 (m, 2), 3.49 (dd, 1,  $J = 8.5, 8.5$ ), 3.23 (s, 3), 2.65 (d, 1,  $J = 13.4$ ), 2.58 (d, 1,  $J = 13.4$ ), 2.14-2.02 (m, 1), 2.02-1.91 (m, 1), 1.87-1.76 (m, 1), 1.48-1.38 (m, 1), 1.45 (s, 9), 1.04 (s, 9), 0.99

(d, 3,  $J = 6.7$ );  $^{13}\text{C}$  NMR 169.0, 135.5 (4 C), 133.7, 133.6, 129.6 (2 C), 127.6 (4 C), 106.3, 80.5, 72.9, 63.2, 48.4, 47.1, 42.1, 39.6, 35.7, 28.0 (3 C), 26.8 (3 C), 19.1, 11.5; IR (neat) 2931, 2856, 1728; HRMS (Q-tof) calcd for  $\text{C}_{29}\text{H}_{41}\text{O}_4\text{Si}$  ( $\text{M}^+ - \text{OCH}_3$ ) 481.2774, found 481.2758.

An identical reaction with **18** afforded **19**.

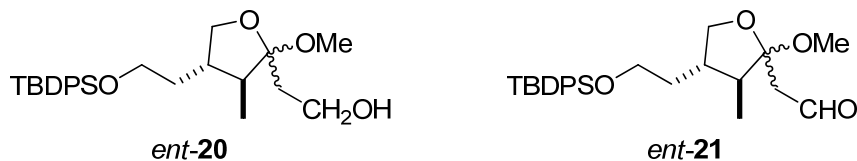

**(3*S*,4*S*)-4-[2-[(1,1-Dimethylethyl)diphenylsilyloxy]ethyl]-tetrahydro-2-methoxyl-3-methyl-2-furanethanol (*ent*-**20**) and (3*S*,4*S*)-4-[2-[(1,1-Dimethylethyl)diphenylsilyloxy]ethyl]-tetrahydro-2-methoxyl-3-methyl-2-furanacetaldehyde (*ent*-**21**).** DIBAL-H (0.82 mL, 1 M in hexane, 0.82 mmol) was added dropwise to a solution of *ent*-**19** (102.3 mg, 0.2 mmol) in ether (6 mL) at  $-78\text{ }^\circ\text{C}$  under  $\text{N}_2$ . The reaction mixture was stirred at  $-78\text{ }^\circ\text{C}$  for 1.5 h. The reaction was quenched with saturated Rochelle salt solution (8 mL) and allowed to warm to  $25\text{ }^\circ\text{C}$ . The resulting mixture was stirred at  $25\text{ }^\circ\text{C}$  for 1 h until clear separation of two layers was observed and extracted with ether ( $3 \times 8$  mL). The combined ether extracts were dried ( $\text{MgSO}_4$ ) and concentrated at  $25\text{ }^\circ\text{C}$  to give 84.7 mg of crude product. Flash chromatography on MeOH-deactivated silica gel (30:1 to 5:1 hexanes/EtOAc) gave 37.8 mg (43%) of aldehyde *ent*-**21** followed by 34.4 mg (39%) of alcohol *ent*-**20**.

Data for *ent*-**21**:  $[\alpha]_{\text{D}}^{22} - 74.7$  ( $c$  2.13,  $\text{CHCl}_3$ );  $^1\text{H}$  NMR 9.69 (dd, 1,  $J = 3.7, 2.4$ ), 7.65 (d, 4,  $J = 6.7$ ), 7.47-7.33 (m, 6), 4.04 (dd, 1,  $J = 8.5, 8.5$ ), 3.68-3.57 (m, 2), 3.55 (dd, 1,  $J = 8.5, 8.5$ ), 3.26 (s, 3), 2.85 (dd, 1,  $J = 14.7, 2.4$ ), 2.59 (dd, 1,  $J = 14.7, 3.7$ ), 2.10-2.08 (m, 1), 1.84-1.74 (m, 1), 1.63-1.52 (m, 1), 1.48-1.37 (m, 1), 1.05 (s, 9), 0.98 (d, 3,  $J = 6.7$ );  $^{13}\text{C}$  NMR 201.0, 135.5 (4 C), 133.6, 133.5, 129.6 (2 C), 127.7 (4 C), 106.0, 73.1, 63.1, 48.6, 48.5, 46.5, 41.9, 35.6, 26.8 (3 C), 19.1, 11.2; IR (neat) 2933, 2858, 1724; HRMS (Q-tof) calcd for  $\text{C}_{26}\text{H}_{36}\text{O}_4\text{SiNa}$  ( $\text{MNa}^+$ ) 463.2281, found 463.2270.



Data for *ent*-**20**:  $[\alpha]_D^{22} - 51.0$  (*c* 0.98, CHCl<sub>3</sub>); <sup>1</sup>H NMR 7.65 (dd, 4, *J*=7.9, 1.8), 7.46-7.36 (m, 6), 3.99 (dd, 1, *J*= 8.5, 8.5), 3.73-3.59 (m, 4), 3.53 (dd, 1, *J*= 8.5, 8.5), 3.23 (s, 3), 2.96 (dd, 1, *J*= 7.3, 3.7, OH), 2.18-2.07 (m, 2), 1.86-1.67 (m, 3), 1.50-1.40 (m, 1), 1.05 (s, 9), 0.97 (d, 3, *J*= 6.7); <sup>13</sup>C NMR 135.5 (4 C), 133.65, 133.58, 129.6 (2 C), 127.7 (4 C), 109.1, 72.8, 63.2, 58.8, 48.3, 46.2, 41.9, 35.8, 33.5, 26.8 (3 C), 19.1, 11.6; IR (neat) 2931, 2856, 1728; HRMS (Q-tof) calcd for C<sub>26</sub>H<sub>38</sub>O<sub>4</sub>NaSi (MNa<sup>+</sup>) 465.2437, found 465.2413.

An identical reaction with **19** afforded **21** and **20**.

**Oxidation of *ent*-20 to Give *ent*-21.** To a solution of oxalyl chloride (59 μL, 679 μmol) in dry CH<sub>2</sub>Cl<sub>2</sub> (2 mL) was added a solution of DMSO (79 μL, 1.13 mmol) dropwise under N<sub>2</sub> at -78 °C. After 15 min, alcohol *ent*-**20** (100 mg, 226 μmol) in CH<sub>2</sub>Cl<sub>2</sub> (2 mL) was added dropwise and the solution was stirred at -78 °C for 1 h. NEt<sub>3</sub> (0.47 mL, 226 μmol) was added dropwise and the solution was stirred at -78 °C for 2 h and warmed to -30 °C over a period of 1 h. The reaction mixture was quenched with 5% aqueous NaHSO<sub>3</sub> (6 mL) and warmed to 25 °C. The two layers were separated and the aqueous layer was extracted with CH<sub>2</sub>Cl<sub>2</sub> (2 × 6 mL). The combined organic layers were dried (Na<sub>2</sub>SO<sub>4</sub>) and concentrated at 25 °C. Flash chromatography on MeOH-deactivated silica gel (30:1 hexanes/EtOAc) gave 52.0 mg (52%) of aldehyde *ent*-**21**.

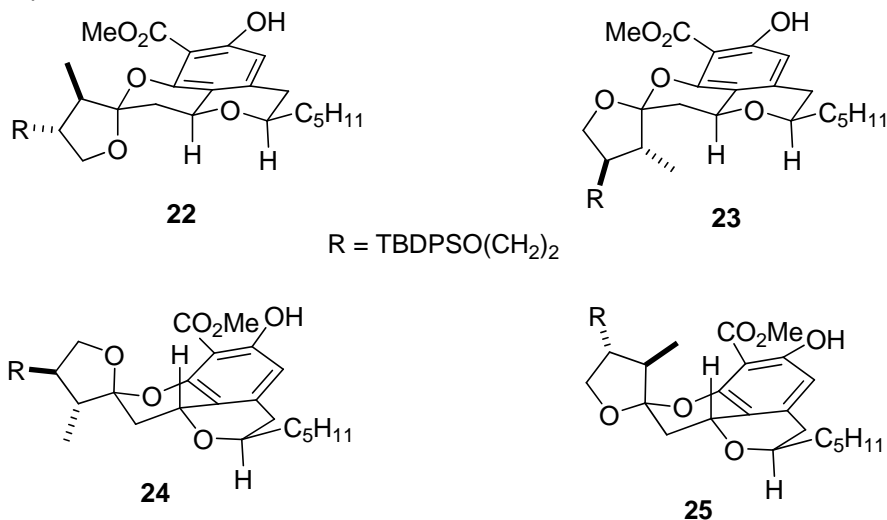

**Methyl (2*S*,3*R*,3'*aS*,4*R*,5'*R*)-, (2*R*,3*R*,3'*aS*,4*R*,5'*R*)-, (2*R*,3*R*,3'*aR*,4*R*,5'*R*)-, and (2*S*,3*R*,3'*aR*,4*R*,5'*R*)-4-[2-[(1,1-Dimethylethyl)diphenylsilyloxy]ethyl]-3',3'*a*,4,5,5',6'-hexahydro-8'-hydroxy-3-methyl-5'-pentyl-spiro[furan-2(3*H*),2'-[2*H*]pyrano[2,3,4-*de*][1]benzopyran]-9'-carboxylate (22, 23, 24, and 25, respectively).** A solution of freshly prepared acid (*R*)-(-)-**3** (31.5 mg, 118  $\mu$ mol) and freshly prepared ketal aldehyde **21** (40.4 mg, 92  $\mu$ mol) was treated with Dowex 50WX8-400-H<sup>+</sup> ion exchange resin (30 mg) at 25 °C and stirred at 25 °C for 12 h. The reaction mixture was filtered through Celite to remove the catalyst and the filtrate was concentrated to give crude product.

An ether solution (2 mL) of diazomethane (0.67 mmol) was added dropwise to an ether solution (2 mL) of the crude product at 25 °C. The resulting solution was stirred at 25 °C for 20 min and carefully concentrated to give crude tetracyclic diastereomers. Flash chromatography on silica gel (50:1 to 20:1 hexanes/EtOAc) gave 35.3 mg (57%) of a 4:1:3:0 mixture of **22**, **23**, **24**, and **25** as determined by integration of H-15 at  $\delta$  4.75 (dd, 1,  $J$  = 12.2, 5.2), 4.55 (dd, 1,  $J$  = 12.0, 5.6), and 4.85 (dd, 1,  $J$  = 11.3, 6.4), respectively. The structures were tentatively assigned by analogy to the peaks for **9-12** at  $\delta$  4.77 (dd, 1,  $J$  = 12.2, 5.4), 4.57 (dd, 1,  $J$  = 12.2, 5.3), 4.85 (dd, 1,  $J$  = 11.4, 6.5), and 4.68 (dd, 1,  $J$  = 10.3, 6.3).

TFA (2  $\mu$ L) was added to a CDCl<sub>3</sub> solution (1 mL) of the above mixture. The reaction was stirred at 25 °C for 20 h and concentrated under reduced pressure. Flash chromatography on silica gel (30:1 hexanes/EtOAc) gave a 2:trace:1:0 mixture of **22-25**. The early fraction contained pure **22**.

Data for **22**: <sup>1</sup>H NMR 11.4 (s, 1, OH), 7.66 (d, 4,  $J$  = 6.3), 7.48-7.33 (m, 6), 6.32 (s, 1, H-4), 4.75 (dd, 1,  $J$  = 12.2, 5.2, H-15), 4.14 (dd, 1,  $J$  = 7.8, 7.8, H-26), 3.86 (s, 3, OMe), 3.84-3.77 (m, 1, H-9), 3.69 (dd, 1,  $J$  = 7.8, 7.8, H-26), 3.72-3.64 (m, 2, 2 H-21), 2.77 (dd, 1,  $J$  = 17.7, 4.3, H-8), 2.61 (dd, 1,  $J$  = 17.7, 11.0, H-8), 2.24 (dd, 1,  $J$  = 12.2, 5.2, H-16), 2.28-2.20 (m, 1, H-18), 2.04-1.86 (m, 3, 2 H-20, H-19), 1.81 (dd, 1,  $J$  = 12.2, 12.2, H-16), 1.68-1.60 (m, 1), 1.58-1.46 (m, 2), 1.45-1.26 (m, 5), 1.05 (s, 9), 1.05 (d, 3,  $J$  = 6.7, 3 H-25), 0.90 (t, 3,  $J$  = 6.7, 3 H-14).

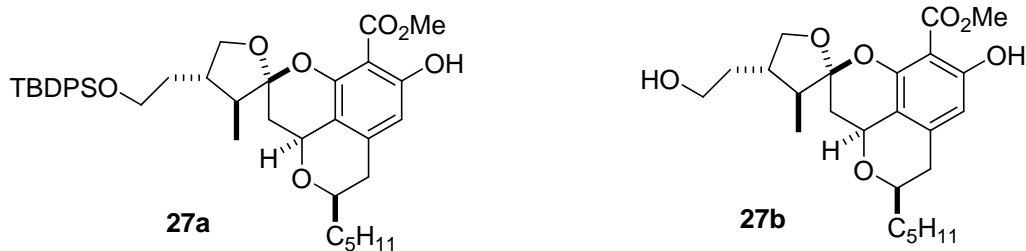

**Methyl (2*S*,3*S*,3'*aS*,4*S*,5'*R*)-4-[2-[(1,1-Dimethylethyl)diphenylsilyloxy]ethyl]-3',3'*a*,4,5,5',6'-hexahydro-8'-hydroxy-3-methyl-5'-pentyl-spiro[furan-2(3*H*),2'-[2*H*]pyrano[2,3,4-*de*][1]benzopyran]-9'-carboxylate (27a) and Methyl (2*S*,3*S*,3'*aS*,4*S*,5'*R*)-3',3'*a*,4,5,5',6'-Hexahydro-8'-hydroxy-4-[2-hydroxyethyl]-3-methyl-5'-pentyl-spiro[furan-2(3*H*),2'-[2*H*]pyrano[2,3,4-*de*][1]benzopyran]-9'-carboxylate (27b).** A solution of freshly prepared acid (*R*)-(-)-**3** (37.8 mg, 141  $\mu$ mol) and freshly prepared ketal aldehyde *ent*-**21** (48.0 mg, 109  $\mu$ mol) was treated with Dowex 50WX8-400-H<sup>+</sup> ion exchange resin (25 mg) at 25 °C and stirred at 25 °C for 60 h. The reaction mixture was filtered through Celite to remove the catalyst and the filtrate was concentrated to give 79.1 mg of crude product.

An ether solution (2 mL) of diazomethane (0.67 mmol) was added dropwise to an ether solution (2 mL) of the 79 mg of crude product at 25 °C. The resulting solution was stirred at 25 °C for 20 min and carefully concentrated to give crude ester. Flash chromatography on silica gel (50:1 to 2:1 hexanes/EtOAc) gave 22.1 mg (30%) of **27a** followed by 10.6 mg (22%) of **27b**.

Data for **27a**:  $[\alpha]_D^{22}$  -64.6 (*c* 1.11, CHCl<sub>3</sub>); <sup>1</sup>H NMR 11.4 (s, 1, OH), 7.66 (d, 4, *J* = 7.8), 7.48-7.33 (m, 6), 6.31 (s, 1, H-4), 4.76 (dd, 1, *J* = 12.2, 5.4, H-15), 4.25 (dd, 1, *J* = 8.5, 8.5, H-26), 3.83-3.76 (m, 1, H-9), 3.82 (s, 3, OMe), 3.73-3.64 (m, 2, 2 H-21), 3.55 (dd, 1, *J* = 8.5, 8.5, H-26), 2.76 (dd, 1, *J* = 17.6, 3.9, H-8), 2.60 (dd, 1, *J* = 17.6, 10.7, H-8), 2.45-2.33 (m, 1, H-19), 2.16 (dd, 1, *J* = 12.2, 5.4, H-16), 1.95 (dd, 1, *J* = 12.2, 12.2, H-16), 1.95-1.87 (m, 1, H-20), 1.73 (dq, 1, *J* = 10.5, 6.7, H-18), 1.68-1.60 (m, 1, H-10), 1.58-1.46 (m, 3), 1.44-1.24 (m, 5), 1.06 (d, 3, *J* = 6.7, 3 H-25), 1.055 (s, 9), 0.90 (t, 3, *J* = 6.6); <sup>13</sup>C NMR 171.6, 162.1, 152.1, 141.3, 135.5 (4 C), 133.5 (2 C), 129.71, 129.69, 127.7 (4 C), 112.7, 108.9, 108.3, 99.9, 75.1, 73.5, 68.2, 63.2, 52.0, 49.0, 41.6, 36.3, 35.5, 34.5, 34.0, 31.8, 26.8 (3 C), 25.1, 22.6, 19.1, 14.0, 11.7; IR (neat)

3398, 2957, 2932, 2859, 1660; HRMS (EI) calcd for  $C_{40}H_{52}O_7Si$  ( $M^+$ ) 672.3482, found 672.3480.

Data for **27b**:  $[\alpha]_D^{22} - 98.7$  ( $c$  0.53,  $CHCl_3$ );  $^1H$  NMR 11.4 (s, 1, OH), 6.31 (s, 1, H-4), 4.76 (dd, 1,  $J = 12.2, 5.4$ , H-15), 4.25 (dd, 1,  $J = 8.5, 8.5$ , H-26), 3.91 (s, 3, OMe), 3.85-3.77 (m, 1, H-9), 3.72 (t, 2,  $J = 6.1$ , 2 H-21), 3.63 (dd, 1,  $J = 8.5, 8.5$ , H-26), 2.76 (dd, 1,  $J = 17.6, 3.9$ , H-8), 2.60 (dd, 1,  $J = 17.6, 10.7$ , H-8), 2.49-2.34 (m, 1, H-19), 2.18 (dd, 1,  $J = 12.2, 5.4$ , H-16), 1.96 (dd, 1,  $J = 12.2, 12.2$ , H-16), 1.99-1.90 (m, 1, H-20), 1.76 (dq, 1,  $J = 10.7, 6.3$ , H-18), 1.68-1.60 (m, 1, H-10), 1.60-1.46 (m, 3), 1.45-1.24 (m, 5), 1.09 (d, 3,  $J = 6.8$ , 3 H-25), 0.90 (t, 3,  $J = 6.6$ );  $^{13}C$  NMR 171.6, 162.1, 152.0, 141.3, 112.7, 109.1, 108.3, 99.9, 75.1, 73.1, 68.1, 61.9, 52.0, 48.9, 40.8, 36.3, 35.3, 34.5, 33.9, 31.8, 25.1, 22.6, 14.0, 11.7; IR (neat) 3406, 2953, 2933, 2860, 1660; HRMS (EI) calcd for  $C_{24}H_{34}O_7$  ( $M^+$ ) 434.2305, found 434.2305.

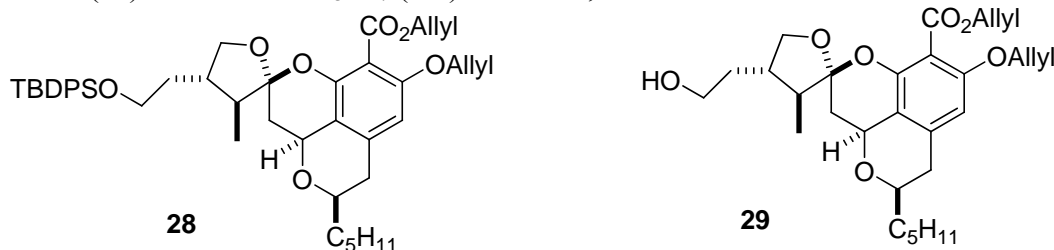

**2-Propenyl (2*S*,3*S*,3'*aS*,4*S*,5'*R*)-4-[2-[(1,1-Dimethylethyl)diphenylsilyloxy]ethyl]-3',3'*a*,4,5,5',6'-hexahydro-3-methyl-5'-pentyl-8'-(2-propenyloxy)-spiro[furan-2(3*H*),2'-[2*H*]pyrano[2,3,4-*de*][1]benzopyran]-9'-carboxylate (28) and 2-Propenyl (2*S*,3*S*,3'*aS*,4*S*,5'*R*)-3',3'*a*,4,5,5',6'-Hexahydro-4-[2-hydroxyethyl]-3-methyl-5'-pentyl-8'-(2-propenyloxy)-spiro[furan-2(3*H*),2'-[2*H*]pyrano[2,3,4-*de*][1]benzopyran]-9'-carboxylate (29).** A solution of freshly prepared acid (*R*)-(-)-**3** (42.0 mg, 157  $\mu$ mol) and freshly prepared ketal aldehyde *ent*-**21** (43 mg, 97.7  $\mu$ mol) was treated with Dowex 50WX8-400- $H^+$  ion exchange resin (23 mg) at 25  $^{\circ}C$  and the solution was stirred for 60 h. The reaction mixture was filtered through Celite to remove the catalyst and the filtrate was concentrated to give 78.8 mg of crude product.

To a suspension of the above crude product and  $K_2CO_3$  (108 mg, 784  $\mu$ mol) in DMF (2 mL) was added allyl bromide (102  $\mu$ L, 1.18 mmol) under  $N_2$  at 25  $^{\circ}C$ . The reaction mixture

was stirred at 25 °C for 12 h. H<sub>2</sub>O (4 mL) was added and the mixture was extracted with CH<sub>2</sub>Cl<sub>2</sub> (4 × 5 mL). The combined organic layers were dried (Na<sub>2</sub>SO<sub>4</sub>) and concentrated under reduced pressure. Flash chromatography on silica gel (30:1 to 2:1 hexanes/EtOAc) gave 23.1 mg (32%) of **28** followed by 10.0 mg (20%) of **29**.

Data for **28**:  $[\alpha]_D^{22}$  -60.0 (*c* 2.31, CHCl<sub>3</sub>); <sup>1</sup>H NMR 7.66 (d, 4, *J* = 6.7), 7.47-7.34 (m, 6), 6.23 (s, 1, H-4), 6.02-5.90 (m, 2), 5.36 (br d, 1, *J* = 17.7), 5.33 (br d, 1, *J* = 17.1), 5.22 (br d, 1, *J* = 10.4), 5.15 (br d, 1, *J* = 10.4), 4.84-4.65 (m, 2, H-15), 4.71 (dd, 1, *J* = 12.3, 5.2), 4.51 (d, 2, *J* = 4.9), 4.20 (dd, 1, *J* = 8.5, 8.5, H-26), 3.83-3.78 (m, 1, H-9), 3.72-3.60 (m, 2, 2 H-21), 3.62 (dd, 1, *J* = 8.5, 8.5, H-26), 2.75 (dd, 1, *J* = 17.1, 3.7, H-8), 2.60 (dd, 1, *J* = 17.1, 10.7, H-8), 2.30-2.18 (m, 1, H-19), 2.15 (dd, 1, *J* = 12.2, 4.9, H-16), 1.97 (dd, 1, *J* = 12.2, 12.2, H-16), 1.89-1.80 (m, 1, H-20), 1.73-1.59 (m, 2, H-18, H-10), 1.58-1.46 (m, 3), 1.43-1.25 (m, 5), 1.05 (s, 9), 1.01 (d, 3, *J* = 6.7, 3 H-25), 0.90 (t, 3, *J* = 6.4); <sup>13</sup>C NMR 165.5, 155.5, 149.0, 135.8, 135.5 (4 C), 133.55, 133.52, 132.9, 132.3, 129.7 (2 C), 127.7 (4 C), 118.1, 117.1, 114.6, 109.6, 108.7, 104.2, 75.3, 73.3, 69.4, 68.1, 65.6, 63.2, 49.0, 41.3, 36.3, 35.6, 34.5, 34.4, 31.8, 26.8 (3 C), 25.1, 22.6, 19.1, 14.0, 11.6; IR (neat) 2957, 2932, 2859, 1739, 1732; HRMS (EI) calcd for C<sub>45</sub>H<sub>58</sub>O<sub>7</sub>Si (M<sup>+</sup>) 738.3952, found 738.3953.

Data for **29**:  $[\alpha]_D^{22}$  -88.1 (*c* 1.00, CHCl<sub>3</sub>); <sup>1</sup>H NMR 6.23 (s, 1, H-4), 6.06-5.92 (m, 2), 5.39 (br d, 1, *J* = 17.1), 5.36 (br d, 1, *J* = 17.1), 5.24 (br d, 1, *J* = 9.8), 5.23 (br d, 1, *J* = 10.4), 4.86-4.76 (m, 2, H-15), 4.74 (dd, 1, *J* = 13.4, 5.5), 4.51 (d, 2, *J* = 4.9), 4.20 (dd, 1, *J* = 8.2, 8.2, H-26), 3.86-3.77 (m, 1, H-9), 3.72-3.58 (m, 2, 2 H-21), 3.59 (dd, 1, *J* = 8.2, 8.2, H-26), 2.75 (dd, 1, *J* = 16.5, 4.0, H-8), 2.60 (dd, 1, *J* = 16.5, 11.0, H-8), 2.30-2.19 (m, 1, H-19), 2.16 (dd, 1, *J* = 12.2, 5.5, H-16), 1.97 (dd, 1, *J* = 12.2, 12.2, H-16), 1.92-1.85 (m, 1, H-20), 1.71 (dq, 1, *J* = 10.5, 6.7, H-18), 1.70-1.60 (m, 1, H-10), 1.58-1.46 (m, 3), 1.45-1.25 (m, 5), 1.03 (d, 3, *J* = 6.7, 3 H-25), 0.90 (t, 3, *J* = 6.7); <sup>13</sup>C NMR 165.6, 155.5, 149.0, 135.9, 132.9, 132.3, 118.1, 117.1, 114.6, 109.5, 108.8, 104.3, 75.3, 72.9, 69.4, 68.1, 65.6, 61.8, 48.9, 40.6, 36.3, 35.7, 34.43, 34.40, 31.8, 25.1, 22.6, 14.0, 11.7; IR (neat) 3432, 2932, 2876, 1739, 1732, 1714; HRMS (EI) calcd for C<sub>29</sub>H<sub>40</sub>O<sub>7</sub> (M<sup>+</sup>) 500.2774, found 500.2769.

**Deprotection of 28.** To a solution of **28** (64.7 mg, 88  $\mu$ mol) in THF (4 mL) was added TBAF (350  $\mu$ L, 1 M in THF, 350  $\mu$ mol) and AcOH (20  $\mu$ L, 350  $\mu$ mol). The solution was stirred at 25 °C for 12 h. The mixture was concentrated under reduced pressure at 25 °C. The residue was treated with brine (4 mL) and 45 drops of saturated NaHCO<sub>3</sub> to adjust the pH to 7 and the aqueous layer was extracted with distilled ether (6  $\times$  10 mL). The combined extracts were dried (Na<sub>2</sub>SO<sub>4</sub>) and concentrated to yield 73.6 mg of crude **29**. Flash chromatography on silica gel (2:1 hexanes/EtOAc) gave 37.7 mg (86%) of pure **29**.

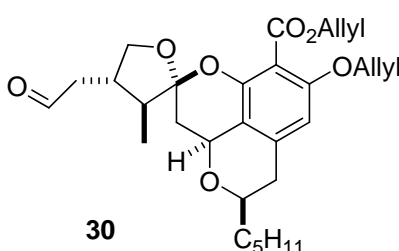

**2-Propenyl (2*S*,3*S*,3'*a**S*,4*S*,5'*R*)-3',3'*a*,4,5,5',6'-Hexahydro-3-methyl-4-[2-oxoethyl]-5'-pentyl-8'-(2-propenyloxy)-spiro[furan-2(3*H*),2'-[2*H*]pyrano[2,3,4-*de*][1]benzopyran]-9'-carboxylate (30).** Dess-Martin periodinane (178 mg, 0.42 mmol) was added to a solution of alcohol **29** (105 mg, 0.21 mmol) in CH<sub>2</sub>Cl<sub>2</sub> (10 mL) at 0 °C. The suspension was allowed to warm to 25 °C and continued to stir for 1 h. The solvent was removed under reduced pressure at 25 °C. Flash chromatography on MeOH-deactivated silica gel (5:1 hexanes/EtOAc) gave 92.4 mg (88%) of pure **30**:  $[\alpha]_D^{22}$  -103.9 (*c* 0.18, CHCl<sub>3</sub>); <sup>1</sup>H NMR 9.81 (s, 1), 6.24 (s, 1, H-4), 6.08-5.92 (m, 2), 5.40 (br d, 1, *J* = 16.5), 5.36 (br d, 1, *J* = 15.9), 5.26 (br d, 1, *J* = 11.6), 5.23 (br d, 1, *J* = 11.0), 4.85 (dd, 1, *J* = 13.3, 6.1), 4.80 (dd, 1, *J* = 12.2, 5.5, H-15), 4.74 (dd, 1, *J* = 13.3, 5.8), 4.52 (d, 2, *J* = 4.9), 4.35 (dd, 1, *J* = 8.5, 8.5, H-26), 3.88-3.78 (m, 1, H-9), 3.51 (dd, 1, *J* = 8.5, 8.5, H-26), 2.80 (dd, 1, *J* = 17.7, 3.7, H-20), 2.75 (dd, 1, *J* = 16.5, 4.3, H-8), 2.61 (dd, 1, *J* = 16.5, 11.0, H-8), 2.66-2.57 (m, 1, H-19), 2.43 (dd, 1, *J* = 17.7, 9.8, H-20), 2.16 (dd, 1, *J* = 12.2, 5.5, H-16), 1.96 (dd, 1, *J* = 12.2, 12.2, H-16), 1.73 (dq, 1, *J* = 10.4, 6.7, H-18), 1.71-1.60 (m, 1, H-10), 1.58-1.46 (m, 2), 1.45-1.24 (m, 5), 1.04 (d, 3, *J* = 6.7, 3 H-25), 0.90 (t, 3, *J* = 6.7); <sup>13</sup>C NMR 200.5, 165.5, 155.6, 148.8, 135.9, 132.9, 132.3, 118.4, 117.2, 114.5, 109.6, 108.4, 104.5,

75.3, 72.2, 69.4, 68.0, 65.7, 48.5, 47.3, 37.6, 36.3, 34.4, 34.3, 31.8, 25.1, 22.6, 14.0, 11.5; IR (neat) 2957, 2932, 2860, 1738, 1732, 1716; HRMS (EI) calcd for C<sub>29</sub>H<sub>38</sub>O<sub>7</sub> (M<sup>+</sup>) 498.2618, found 498.2611.

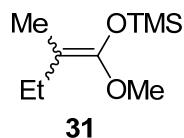

**1-Methoxy-1-trimethylsiloxy-2-methyl-1-butene (31)** was prepared by the literature procedure.<sup>[17]</sup> *n*-BuLi (12.6 mL, 1.6 M in hexane, 20 mmol) was added dropwise to a solution of diisopropylamine (2.82 mL, 20 mmol) in THF (15 mL) under N<sub>2</sub> at 0 °C. The resulting solution was stirred at 0 °C for 30 min and cooled to -78 °C. A solution of methyl 2-methylbutanoate (2.64 mL, 20 mmol) in THF (6 mL) was added dropwise to the reaction mixture and the reaction was stirred at -78 °C for 1 h. TMSCl (3 mL, 24 mmol) was added dropwise to the reaction mixture and the reaction was slowly warmed up to 25 °C over 3 h. The reaction was quenched with ice water (20 mL). The two layers were separated and the aqueous layer was extracted with hexanes (3 × 20 mL). The combined organic extracts were dried (Na<sub>2</sub>SO<sub>4</sub>) and concentrated at 25 °C. The crude oil was purified by distillation (bp 95-97 °C/35 torr) to give 2.78 g (74%, 7:3 mixture of isomers) of **31** as a colorless oil: <sup>1</sup>H NMR 3.50 (s, 3), 1.99 (q, 0.3 × 2, *J* = 7.6), 1.94 (q, 0.7 × 2, *J* = 7.6), 1.55 (s, 0.7 × 3), 1.51 (s, 0.3 × 3), 0.94 (q, 0.3 × 2, *J* = 7.6), 0.93 (q, 0.7 × 2, *J* = 7.6), 0.208 (s, 0.3 × 3), 0.203 (s, 0.7 × 3). The <sup>1</sup>H NMR spectral data are identical to the literature data.<sup>[17]</sup>

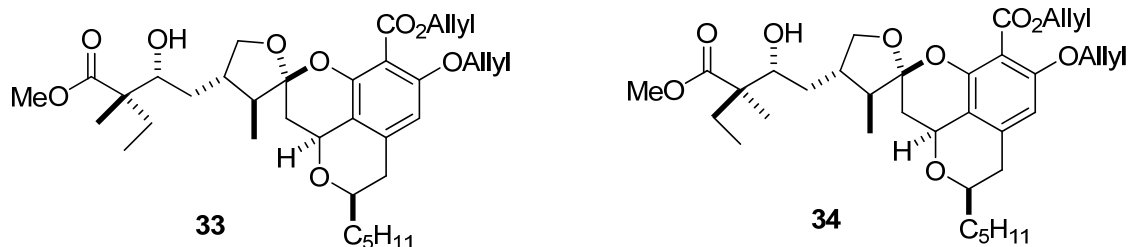

**Methyl (α*S*,β*R*,2*S*,3*S*,3'*aS*,4*S*,5'*R*)- and (α*R*,β*R*,2*S*,3*S*,3'*aS*,4*S*,5'*R*)- α,3-Dimethyl-α-ethyl-3',3'*a*,4,5,5',6'-hexahydro-β-hydroxyl-3-methyl-5'-pentyl-8'-(2-propenyloxy)-9'-(2-propenyloxycarbonyl)-spiro[furan-2(3*H*),2'-[2*H*]pyrano[2,3,4-*de*][1]benzopyran]-4-**

**butanoate (33 and 34).** To a solution of *N*-Ts-(*S*)-valine (84 mg, 0.31 mmol)<sup>[19]</sup> in dry CH<sub>2</sub>Cl<sub>2</sub> (2 mL) was added BH<sub>3</sub>•THF (0.31 mL, 1 M solution in THF, 0.31 mmol) by syringe over 3 min under N<sub>2</sub> at 0 °C. The solution was stirred for 30 min at 0 °C and additionally for 30 min at 25 °C. The solution was cooled -78 °C and a solution of aldehyde **30** (44.0 mg, 88.4 μmol) in CH<sub>2</sub>Cl<sub>2</sub> (0.5 mL) was added dropwise over 3 min. After stirring for 5 min, silyl ketene acetal **31** (49 mg, 0.31 mmol) in CH<sub>2</sub>Cl<sub>2</sub> (0.5 mL) was added dropwise over 3 min. The reaction mixture was stirred for 4 h at -78 °C and quenched with 1 M aqueous HCl (4 mL). The mixture was allowed to warm to 25 °C and the aqueous layer was extracted with CH<sub>2</sub>Cl<sub>2</sub> (4 × 5 mL). The combined organic layers were washed with saturated NaHCO<sub>3</sub> (2 × 10 mL), dried (MgSO<sub>4</sub>) and concentrated to yield 71.6 mg of crude aldol product. Preparative TLC (4:1 hexanes/EtOAc, developed four times) gave 21.5 mg (40%) of **33** followed with 21.9 mg (40%) of **34**.

Data for **33**:  $[\alpha]_D^{22}$  -95.0 (*c* 0.22, CHCl<sub>3</sub>); <sup>1</sup>H NMR 6.23 (s, 1, H-4), 6.07-5.92 (m, 2), 5.40 (br d, 1, *J* = 17.1), 5.36 (br d, 1, *J* = 16.5), 5.25 (br d, 1, *J* = 9.8), 5.22 (br d, 1, *J* = 9.2), 4.86-4.72 (m, 3, H-15), 4.51 (d, 2, *J* = 4.9), 4.28 (dd, 1, *J* = 8.5, 8.5, H-26), 3.86-3.78 (m, 1, H-9), 3.77-3.69 (m, 1, H-21), 3.709 (s, 3, OMe), 3.65 (dd, 1, *J* = 8.5, 8.5, H-26), 2.75 (dd, 1, *J* = 17.1, 3.4, H-8), 2.60 (dd, 1, *J* = 17.1, 11.0, H-8), 2.27-2.20 (m, 1, H-19), 2.22 (d, 1, *J* = 6.1, OH), 2.14 (dd, 1, *J* = 12.2, 5.5, H-16), 1.96 (dd, 1, *J* = 12.2, 12.2, H-16), 1.80 (dq, 1, *J* = 13.4, 7.3), 1.71-1.60 (m, 3), 1.59-1.46 (m, 3), 1.45-1.24 (m, 6), 1.14 (s, 3, 3 H-27), 1.03 (d, 3, *J* = 6.7, 3 H-25), 0.90 (t, 3, *J* = 6.7), 0.87 (t, 3, *J* = 7.3); <sup>13</sup>C NMR 176.94, 165.66, 155.55, 149.09, 135.89, 132.96, 132.40, 118.17, 117.13, 114.65, 109.52, 108.52, 104.23, 76.22, 75.31, 73.87, 69.38, 68.11, 65.64, 51.79, 51.23, 49.04, 42.48, 36.32, 35.31, 34.55, 34.41, 31.79, 28.38, 25.14, 22.61, 16.75, 14.04, 11.87, 8.99; IR (neat) 3508, 2953, 2933, 2860, 1739, 1732, 1715; HRMS (EI) calcd for C<sub>35</sub>H<sub>50</sub>O<sub>9</sub> (M<sup>+</sup>) 614.3455, found 614.3451.

Data for **34**:  $[\alpha]_D^{22}$  -96.3 (*c* 0.22, CHCl<sub>3</sub>); <sup>1</sup>H NMR 6.23 (s, 1, H-4), 6.07-5.92 (m, 2), 5.40 (br d, 1, *J* = 17.1), 5.36 (br d, 1, *J* = 16.5), 5.25 (br d, 1, *J* = 9.8), 5.22 (br d, 1, *J* = 9.2), 4.86-4.72 (m, 3, H-15), 4.51 (d, 2, *J* = 4.9), 4.31 (dd, 1, *J* = 8.5, 8.5, H-26), 3.86-3.77 (m, 1, H-9), 3.726 (s, 3, OMe), 3.74-3.68 (m, 1, H-21), 3.66 (dd, 1, *J* = 8.5, 8.5, H-26), 2.75 (dd, 1, *J* =



17.1, 3.4, H-8), 2.60 (dd, 1,  $J = 17.1, 11.0$ , H-8), 2.51 (d, 1,  $J = 7.3$ , OH), 2.30-2.21 (m, 1, H-19), 2.14 (dd, 1,  $J = 12.2, 4.9$ , H-16), 1.97 (dd, 1,  $J = 12.2, 12.2$ , H-16), 1.81-1.44 (m, 7), 1.43-1.17 (m, 6), 1.13 (s, 3, 3 H-27), 1.04 (d, 3,  $J = 6.1$ , 3 H-25), 0.90 (t, 3,  $J = 6.4$ ), 0.85 (t, 3,  $J = 7.3$ );  $^{13}\text{C}$  NMR 177.58, 165.63, 155.56, 149.10, 135.87, 132.96, 132.39, 118.11, 117.12, 114.64, 109.51, 108.43, 104.22, 75.49, 75.30, 74.00, 69.37, 68.11, 65.62, 51.86, 51.45, 49.07, 42.57, 36.31, 34.57, 34.49, 34.41, 31.78, 29.60, 25.13, 22.60, 16.94, 14.03, 11.87, 8.80; IR (neat) 3522, 2955, 2933, 2860, 1737, 1732, 1715; HRMS (EI) calcd for  $\text{C}_{35}\text{H}_{50}\text{O}_9$  ( $\text{M}^+$ ) 614.3455, found 614.3458.

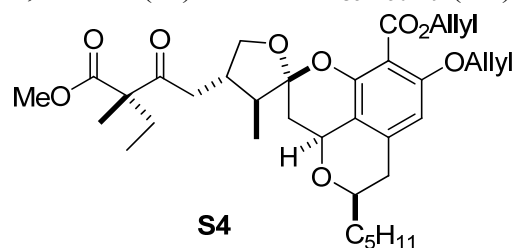

**Methyl ( $\alpha S, 2S, 3S, 3'aS, 4S, 5'R$ )- $\alpha, 3$ -Dimethyl- $\alpha$ -ethyl-3', 3'a, 4, 5, 5', 6'-hexahydro-3-methyl- $\beta$ -oxo-5'-pentyl-8'-(2-propenyloxy)-9'-(2-propenyloxycarbonyl)-spiro[furan-2(3H), 2'-[2H]pyrano[2, 3, 4-de][1]benzopyran]-4-butanoate (S4).** The aldol product **33** (20 mg, 32.5  $\mu\text{mol}$ ) in  $\text{CH}_2\text{Cl}_2$  (2 mL) was treated with Dess-Martin periodinane (28 mg, 66  $\mu\text{mol}$ ) at 0  $^\circ\text{C}$ . The suspension was allowed to warm to 25  $^\circ\text{C}$  and continued to stir for 12 h. The solvent was removed under reduced pressure at 25  $^\circ\text{C}$ . Flash chromatography on silica gel (10:1 hexanes/EtOAc) gave 16.9 mg (85%) of **S4**:  $[\alpha]_{\text{D}}^{22} -88.5$  ( $c$  0.73,  $\text{CHCl}_3$ );  $^1\text{H}$  NMR 6.24 (s, 1, H-4), 6.08-5.92 (m, 2), 5.40 (br d, 1,  $J = 17.7$ ), 5.36 (br d, 1,  $J = 17.1$ ), 5.27 (br d, 1,  $J = 10.4$ ), 5.23 (br d, 1,  $J = 10.4$ ), 4.85 (dd, 1,  $J = 13.4, 6.1$ ), 4.79 (dd, 1,  $J = 12.2, 5.5$ , H-15), 4.74 (dd, 1,  $J = 13.1, 5.8$ ), 4.51 (d, 2,  $J = 4.9$ ), 4.35 (dd, 1,  $J = 8.5, 8.5$ , H-26), 3.86-3.78 (m, 1, H-9), 3.74 (s, 3, OMe), 3.45 (dd, 1,  $J = 8.5, 8.5$ , H-26), 2.77 (dd, 1,  $J = 17.7, 3.4$ , H-20), 2.75 (dd, 1,  $J = 16.5, 3.7$ , H-8), 2.60 (dd, 1,  $J = 17.1, 11.0$ , H-8), 2.62-2.51 (m, 1, H-19), 2.43 (dd, 1,  $J = 17.7, 10.4$ , H-20), 2.14 (dd, 1,  $J = 12.2, 5.5$ , H-16), 1.96 (dd, 1,  $J = 12.2, 12.2$ , H-16), 2.02-1.91 (m, 1, H-23), 1.82 (dq, 1,  $J = 14.0, 7.3$ , H-23), 1.72-1.58 (m, 2), 1.58-1.46 (m, 2), 1.45-1.24 (m, 5), 1.33 (s, 3, H-27), 1.01 (d, 3,  $J = 6.7, 3$  H-25), 0.90 (t, 3,  $J = 6.4$ ), 0.84 (t, 3,  $J = 7.3$ );  $^{13}\text{C}$  NMR 206.6, 173.5, 165.5, 155.6, 148.9, 135.8, 132.9, 132.2, 118.5, 117.1, 114.5, 109.7, 108.4, 104.4, 75.3,

72.8, 69.4, 68.0, 65.7, 59.7, 52.4, 48.4, 42.0, 38.9, 36.3, 34.42, 34.39, 31.8, 27.9, 25.1, 22.6, 18.4, 14.0, 11.6, 8.6; IR (neat) 2957, 2933, 2860, 1739, 1731, 1715; HRMS (EI) calcd for C<sub>35</sub>H<sub>48</sub>O<sub>9</sub> (M<sup>+</sup>) 612.3298, found 612.3300.

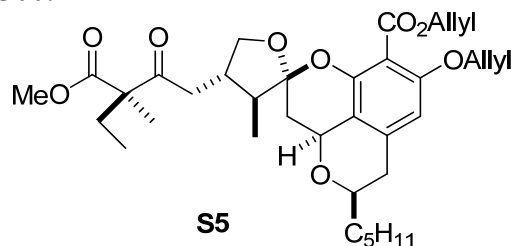

**Methyl ( $\alpha R, 2S, 3S, 3'aS, 4S, 5'R$ )- $\alpha, 3$ -Dimethyl- $\alpha$ -ethyl-3', 3'a, 4, 5, 5', 6'-hexahydro-3-methyl- $\beta$ -oxo-5'-pentyl-8'-(2-propenyloxy)-9'-(2-propenyloxycarbonyl)-spiro[furan-2(3H), 2'-[2H]pyrano[2, 3, 4-de][1]benzopyran]-4-butanoate (S5).** An identical reaction with **34** (20.2 mg, 32.9  $\mu$ mol) afforded 15.6 mg (77%) of **S5**:  $[\alpha]_D^{22} -91.9$  (*c* 0.70, CHCl<sub>3</sub>); <sup>1</sup>H NMR 6.23 (s, 1, H-4), 6.08-5.92 (m, 2), 5.40 (br d, 1, *J* = 17.7), 5.36 (br d, 1, *J* = 17.1), 5.27 (br d, 1, *J* = 10.4), 5.23 (d, 1, *J* = 10.4), 4.85 (dd, 1, *J* = 13.4, 6.1), 4.79 (dd, 1, *J* = 12.2, 5.5, H-15), 4.74 (dd, 1, *J* = 13.1, 5.8), 4.51 (d, 2, *J* = 4.9), 4.35 (dd, 1, *J* = 8.5, 8.5, H-26), 3.86-3.78 (m, 1, H-9), 3.74 (s, 3, OMe), 3.45 (dd, 1, *J* = 8.5, 8.5, H-26), 2.81 (dd, 1, *J* = 17.7, 3.1, H-20), 2.75 (dd, 1, *J* = 17.1, 3.7, H-8), 2.60 (dd, 1, *J* = 17.1, 11.0, H-8), 2.60-2.50 (m, 1, H-19), 2.35 (dd, 1, *J* = 17.7, 10.4, H-20), 2.14 (dd, 1, *J* = 12.2, 4.9, H-16), 1.96 (dd, 1, *J* = 12.2, 12.2, H-16), 2.02-1.91 (m, 1, H-23), 1.82 (dq, 1, *J* = 14.7, 7.3, H-23), 1.72-1.58 (m, 2), 1.58-1.46 (m, 2), 1.45-1.24 (m, 5), 1.34 (s, 3, H-27), 1.00 (d, 3, *J* = 6.7, 3 H-25), 0.90 (t, 3, *J* = 6.7), 0.83 (t, 3, *J* = 7.3); <sup>13</sup>C NMR 206.5, 173.5, 165.5, 155.6, 148.9, 135.8, 132.9, 132.2, 118.5, 117.2, 114.5, 109.7, 108.4, 104.4, 75.3, 72.8, 69.4, 68.0, 65.7, 59.7, 52.4, 48.5, 42.0, 38.9, 36.3, 34.42, 34.39, 31.8, 27.8, 25.1, 22.6, 18.3, 14.0, 11.6, 8.6; IR (neat) 2957, 2934, 2860, 1739, 1732, 1715; HRMS (EI) calcd for C<sub>35</sub>H<sub>48</sub>O<sub>9</sub> (M<sup>+</sup>) 612.3298, found 612.3296.

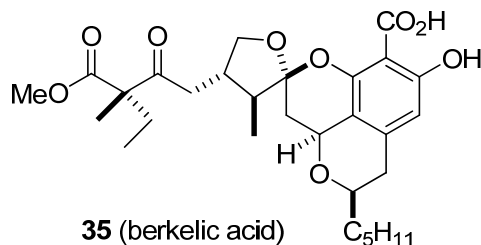

**Methyl ( $\alpha S, 2S, 3S, 3'aS, 4S, 5'R$ )-9'-Carboxy- $\alpha, 3$ -dimethyl- $\alpha$ -ethyl-3', 3'a, 4, 5, 5', 6'-hexahydro-8'-hydroxy-3-methyl- $\beta$ -oxo-5'-pentyl-spiro[furan-2(3*H*), 2'-[2*H*]pyrano[2, 3, 4-*de*][1]benzopyran]-4-butanoate (**35**, berkelic acid).** To a solution of Pd(PPh<sub>3</sub>)<sub>4</sub> (6.1 mg, 5.3  $\mu$ mol) and **S4** (16.2 mg, 26.4  $\mu$ mol) in dry THF (2 mL) was added NEt<sub>3</sub> (148  $\mu$ L, 1.06 mmol) and HCO<sub>2</sub>H (40  $\mu$ L, 1.06 mmol) under N<sub>2</sub> at 25 °C. The yellow solution was stirred at 25 °C for 15 h and quenched with saturated NaHCO<sub>3</sub> (5 mL). The aqueous layer was extracted with ether (4  $\times$  5 mL). The combined organic layers were dried (MgSO<sub>4</sub>) and concentrated. Flash chromatography on silica gel (80:1:0 to 200:1:1 CH<sub>2</sub>Cl<sub>2</sub>/MeOH/AcOH) gave 11.1 mg (78%) of berkelic acid (**35**):  $[\alpha]_D^{22}$  -115.5 (*c* 0.55, MeOH); {lit.<sup>[1]</sup>  $[\alpha]_D^{20}$  -83.5 (*c* 0.0113, MeOH)}; <sup>1</sup>H NMR (CDCl<sub>3</sub>, the residual peak of solvent is referenced as  $\delta$  7.24 rather than 7.27 to facilitate comparison with the literature data<sup>[1]</sup>) 11.82 (s, 1, OH), 11.13-10.92 (br, 1, OH), 6.42 (s, 1, H-4), 4.76 (dd, 1, *J* = 12.2, 5.4, H-15), 4.44 (dd, 1, *J* = 8.5, 8.5, H-26), 3.84-3.76 (m, 1, H-9), 3.73 (s, 3, OMe), 3.59 (dd, 1, *J* = 8.5, 8.5, H-26), 2.85 (dd, 1, *J* = 17.0, 2.4, H-20), 2.78 (dd, 1, *J* = 17.7, 3.7, H-8), 2.60 (dd, 1, *J* = 17.7, 11.0, H-8), 2.54-2.45 (m, 1, H-19), 2.42 (dd, 1, *J* = 17.0, 9.8, H-20), 2.21 (dd, 1, *J* = 12.2, 5.4, H-16), 2.05 (dd, 1, *J* = 12.2, 12.2, H-16), 1.95 (dq, 1, *J* = 14.2, 7.3, H-23), 1.87 (dq, 1, *J* = 10.7, 6.8, H-18), 1.80 (dq, 1, *J* = 14.2, 7.3, H-23), 1.68-1.57 (m, 1), 1.58-1.43 (m, 2), 1.43-1.20 (m, 5), 1.32 (s, 3, H-27), 1.09 (d, 3, *J* = 6.8, 3 H-25), 0.88 (t, 3, *J* = 6.6), 0.83 (t, 3, *J* = 7.6); <sup>1</sup>H NMR (CD<sub>3</sub>OD, 500 MHz) 6.27 (s, 1, H-4), 4.72 (dd, 1, *J* = 12.2, 5.4, H-15), 4.30 (dd, 1, *J* = 8.5, 8.5, H-26), 3.84-3.77 (m, 1, H-9), 3.73 (s, 3, OMe), 3.50 (dd, 1, *J* = 8.5, 8.5, H-26), 2.88 (dd, 1, *J* = 17.6, 3.1, H-20), 2.78 (dd, 1, *J* = 17.3, 3.7, H-8), 2.70-2.62 (m, 1, H-19), 2.54 (dd, 1, *J* = 17.3, 11.2, H-8), 2.53 (dd, 1, *J* = 17.6, 10.5, H-20), 2.14 (dd, 1, *J* = 12.2, 5.4, H-16), 1.94 (dq, 1, *J* = 14.2, 7.3, H-23), 1.91 (dd, 1, *J* = 12.2, 12.2, H-16), 1.88-1.78 (m, 2, H-23, H-18), 1.63-1.48 (m, 3), 1.46-1.27 (m, 5), 1.32 (s, 3, H-27), 1.08 (d, 3, *J* = 6.3, 3 H-25), 0.92 (t,

3,  $J = 6.8$ ), 0.83 (t, 3,  $J = 7.6$ );  $^{13}\text{C}$  NMR ( $\text{CDCl}_3$ ) 206.0, 173.4, 170.5, 162.5, 149.8, 142.2, 112.2 (2 C), 110.5, 98.6, 75.2, 73.5, 67.2, 59.7, 52.5, 48.2, 41.6, 39.4, 36.2, 34.30, 34.29, 31.8, 27.9, 25.0, 22.6, 18.4, 14.0, 12.0, 8.7;  $^{13}\text{C}$  NMR ( $\text{CD}_3\text{OD}$ , 400 MHz) 208.8, 174.8, 173.7, 163.4, 153.1, 142.3, 113.8, 110.7, 109.4, 101.1, 76.6, 74.2, 69.5, 61.0, 52.9, 42.6, 40.5, 37.4, 35.4, 35.0, 33.0, 28.9, 26.2, 23.7, 18.9, 14.4, 11.9, 9.0 (a peak near  $\delta$  49.2 is obscured by the solvent peak); IR (neat) 3238, 2957, 2933, 2860, 1713, 1694; HRMS (EI) calcd for  $\text{C}_{29}\text{H}_{40}\text{O}_9$  ( $\text{M}^+$ ) 532.2672, found 532.2659. The  $^1\text{H}$  and  $^{13}\text{C}$ NMR spectral data in both  $\text{CDCl}_3$  and  $\text{CD}_3\text{OD}$  are identical to those of the natural product (see Tables S2-S5).<sup>[1]</sup>

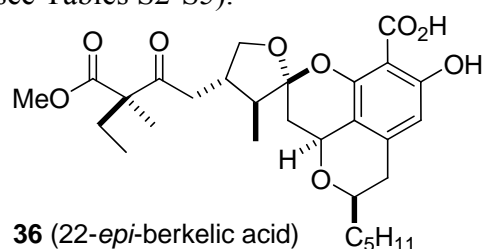

**Methyl ( $\alpha R, 2S, 3S, 3'aS, 4S, 5'R$ )-9'-Carboxy- $\alpha, 3$ -dimethyl- $\alpha$ -ethyl-3', 3'a, 4, 5, 5', 6'-hexahydro-8'-hydroxy-3-methyl- $\beta$ -oxo-5'-pentyl-spiro[furan-2(3H), 2'-[2H]pyrano[2, 3, 4-de][1]benzopyran]-4-butanoate (36, 22-epi-berkelic acid).** An identical reaction with **S5** (14.0 mg, 22.8  $\mu\text{mol}$ ) afforded 8.7 mg (72%) of 22-epi-berkelic acid (**36**):  $[\alpha]_{\text{D}}^{22} -107.0$  ( $c$  0.43, MeOH);  $^1\text{H}$  NMR ( $\text{CDCl}_3$ , the residual peak of solvent is referenced as  $\delta$  7.24 rather than 7.27 to facilitate comparison with the literature data<sup>[1]</sup>) 11.83 (s, 1, OH), 11.08-10.97 (br, 1, OH), 6.42 (s, 1, H-4), 4.77 (dd, 1,  $J = 12.2, 5.4$ , H-15), 4.45 (dd, 1,  $J = 8.5, 8.5$ , H-26), 3.84-3.76 (m, 1, H-9), 3.73 (s, 3, OMe), 3.59 (dd, 1,  $J = 8.5, 8.5$ , H-26), 2.90 (dd, 1,  $J = 17.6, 2.9$ , H-20), 2.79 (dd, 1,  $J = 17.6, 3.9$ , H-8), 2.60 (dd, 1,  $J = 17.6, 11.2$ , H-8), 2.54-2.44 (m, 1, H-19), 2.38 (dd, 1,  $J = 17.6, 10.0$ , H-20), 2.21 (dd, 1,  $J = 12.2, 5.4$ , H-16), 2.06 (dd, 1,  $J = 12.2, 12.2$ , H-16), 1.95 (dq, 1,  $J = 14.2, 7.3$ , H-23), 1.87 (dq, 1,  $J = 11.3, 6.8$ , H-18), 1.80 (dq, 1,  $J = 14.2, 7.3$ , H-23), 1.68-1.57 (m, 1), 1.58-1.43 (m, 2), 1.43-1.20 (m, 5), 1.33 (s, 3, H-27), 1.09 (d, 3,  $J = 6.8, 3$  H-25), 0.88 (t, 3,  $J = 6.6$ ), 0.81 (t, 3,  $J = 7.3$ );  $^1\text{H}$  NMR ( $\text{CD}_3\text{OD}$ , 500 MHz) 6.27 (s, 1, H-4), 4.73 (dd, 1,  $J = 12.2, 5.4$ , H-15), 4.30 (dd, 1,  $J = 8.5, 8.5$ , H-26), 3.84-3.77 (m, 1, H-9), 3.73 (s, 3, OMe), 3.50 (dd, 1,  $J = 8.5, 8.5$ , H-26), 2.92 (dd, 1,  $J = 17.6, 3.0$ , H-20), 2.79 (dd, 1,  $J = 17.3, 3.6$ , H-8), 2.72-

2.62 (m, 1, H-19), 2.55 (dd, 1,  $J = 17.3, 10.3$ , H-8), 2.49 (dd, 1,  $J = 17.6, 10.5$ , H-20), 2.14 (dd, 1,  $J = 12.2, 5.4$ , H-16), 1.94 (dq, 1,  $J = 14.2, 7.3$ , H-23), 1.91 (dd, 1,  $J = 12.2, 12.2$ , H-16), 1.88-1.78 (m, 2, H-23, H-18), 1.64-1.49 (m, 3), 1.47-1.30 (m, 5), 1.33 (s, 3, H-27), 1.08 (d, 3,  $J = 6.3$ , 3 H-25), 0.92 (t, 3,  $J = 6.8$ ), 0.82 (t, 3,  $J = 7.3$ );  $^{13}\text{C}$  NMR ( $\text{CDCl}_3$ ) 206.0, 173.4 (tiny), 170.5, 162.5, 149.8, 142.2, 112.17, 112.15, 110.5, 98.6, 75.2, 73.5, 67.2, 59.7, 52.5, 48.2, 41.5, 39.3, 36.2, 34.31, 34.29, 31.8, 27.9, 25.0, 22.6, 18.3, 14.0, 12.0, 8.6;  $^{13}\text{C}$  NMR ( $\text{CD}_3\text{OD}$ , 400 MHz) 208.7, 174.8, 173.6, 163.4, 153.1, 142.3, 113.8, 110.7, 109.4, 101.1, 76.6, 74.1, 69.5, 61.0, 52.9, 42.6, 40.5, 37.4, 35.4, 35.0, 33.0, 28.8, 26.2, 23.7, 18.8, 14.4, 11.9, 8.9 (a peak near  $\delta$  49.2 is obscured by the solvent peak); IR (neat) 3233, 2957, 2933, 2860, 1713, 1694; HRMS (EI) calcd for  $\text{C}_{29}\text{H}_{40}\text{O}_9$  ( $\text{M}^+$ ) 532.2672, found 532.2667.

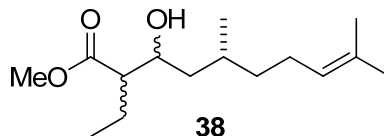

**Methyl (5R)-5,9-Dimethyl-2-ethyl-3-hydroxy-8-decenoate (38).** *n*-BuLi (6.3 mL, 1.6 M in hexane, 10 mmol) was added dropwise to a solution of diisopropylamine (1.41 mL, 10 mmol) in THF (4 mL) under  $\text{N}_2$  at 0 °C. The resulting solution was stirred at 0 °C for 30 min and cooled to -78 °C. A solution of methyl butanoate (1.14 mL, 10 mmol) in THF (4 mL) was added dropwise to the reaction mixture and the reaction was stirred at -78 °C for 1 h. A solution of (*R*)-(+)-citronellal (**37**) (0.81 mL, 4 mmol) in THF (4 mL) was added dropwise to the reaction mixture and the reaction was slowly warmed up to 25 °C over 2 h. The reaction was quenched with saturated  $\text{NH}_4\text{Cl}$  (10 mL) and extracted with ether ( $3 \times 15$  mL). The combined ether extracts were dried ( $\text{Na}_2\text{SO}_4$ ) and concentrated to give 1.23 g of crude **38**. Flash chromatography on silica gel (10:1 hexanes/EtOAc) gave 0.89 g (86%) of **38** as a mixture of four diastereomers:  $^1\text{H}$  NMR 5.14-5.02 (m, 1), 3.94-3.66 (m, 1), 3.72 (s, 3), 2.38-2.30 (m, 1), 2.06-1.88 (m, 3), 1.68 (s, 3), 1.60 (s, 3), 1.79-1.04 (m, 6), 0.98-0.80 (m, 6).

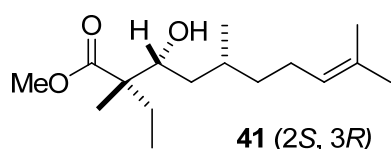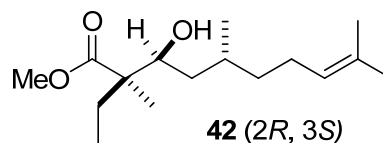

**Methyl (2*S*,3*R*,5*R*)- and (2*R*,3*S*,5*R*)-2-Ethyl-3-hydroxy-2,5,9-trimethyl-8-decenoate (41 and 42).** *n*-BuLi (0.275 mL, 1.6 M in hexane, 0.44 mmol) was added dropwise to a solution of diisopropylamine (62  $\mu$ L, 0.44 mmol) in THF (0.5 mL) under N<sub>2</sub> at 0 °C. The resulting solution was stirred at 0 °C for 30 min and cooled to -50 °C. A solution of **38** (51 mg, 0.2 mmol) in THF (0.5 mL) was added dropwise to the reaction mixture. The resulting solution was stirred at -50 °C for 30 min and at -20 °C for 1 h. A solution of MeI (25  $\mu$ L, 0.61 mmol) and HMPA (0.21 mL, 1.2 mmol) in THF (0.3 mL) was added dropwise to the reaction mixture. The solution was stirred at -20 °C for 2 h and slowly warmed up to 25 °C over 1 h. The reaction mixture was quenched with saturated NH<sub>4</sub>Cl (4 mL) and extracted with ether (4  $\times$  4 mL). The combined ether extracts were dried (MgSO<sub>4</sub>) and concentrated. Flash chromatography on silica gel (25:1 hexanes/EtOAc) gave 8.8 mg (16%) of 1:1 mixture of **41** and **42**.

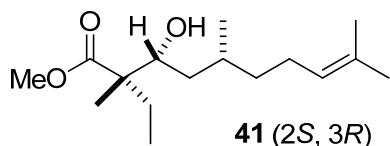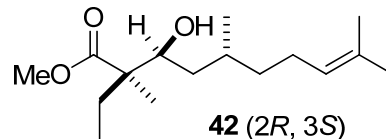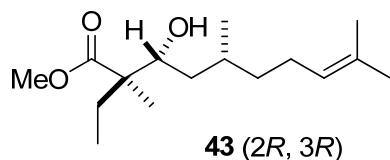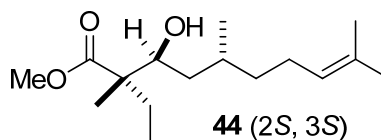

**Methyl (2*S*,3*R*,5*R*)-, (2*R*,3*R*,5*R*)-, (2*R*,3*S*,5*R*)-, and (2*S*,3*S*,5*R*)-2-Ethyl-3-hydroxy-2,5,9-trimethyl-8-decenoate (41, 43, 42, and 44, respectively).** To a solution of *N*-Ts-(*S*)-valine<sup>[19]</sup> (81 mg, 0.3 mmol) in dry CH<sub>2</sub>Cl<sub>2</sub> (1 mL) was added BH<sub>3</sub>•THF (0.3 mL, 1 M solution in THF, 0.3 mmol) by syringe over 3 min under N<sub>2</sub> at 0 °C. The solution was stirred for 30 min at 0 °C and additionally for 30 min at 25 °C. The solution was cooled -78 °C and a solution of *R*-(+)-citronellal (**37**) (16.3  $\mu$ L, 90  $\mu$ mol) in CH<sub>2</sub>Cl<sub>2</sub> (0.5 mL) was added dropwise over 3 min. After stirring for 5 min, silyl ketene acetal **31** (47 mg, 0.3 mmol) in CH<sub>2</sub>Cl<sub>2</sub> (0.5 mL) was added dropwise over 3 min. The reaction mixture was stirred for 4 h at -78 °C and quenched with 1 M aqueous HCl (3 mL). The mixture was allowed to warm to 25 °C and the aqueous layer was

extracted with CH<sub>2</sub>Cl<sub>2</sub> (4 × 3 mL). The combined organic layers were washed with saturated NaHCO<sub>3</sub> (2 × 6 mL), dried (MgSO<sub>4</sub>) and concentrated to yield 21.9 mg of crude aldol product. Flash chromatography (25:1 hexanes/EtOAc) gave 9.1 mg (38%) of **41** contaminated with 15% of **42**, followed by 10.0 mg (41%) of **43** contaminated with 15% of **44**.

Data for **41**: <sup>1</sup>H NMR 5.13-5.06 (m, 1), 3.789 (br d, 1, *J* = 9.8), 3.685 (s, 3), 2.07-1.85 (m, 3, OH), 1.80 (dq, 1, *J* = 14.0, 7.3), 1.72-1.64 (m, 1), 1.68 (s, 3), 1.61 (s, 3), 1.54 (dq, 1, *J* = 13.4, 7.3), 1.52-1.42 (m, 1), 1.33-1.16 (m, 3), 1.113 (s, 3), 0.94 (d, 3, *J* = 6.7), 0.85 (t, 3, *J* = 7.3); <sup>13</sup>C NMR 177.05, 131.20, 124.78, 74.09, 51.62, 51.43, 40.16, 35.52, 29.60, 28.57, 25.72, 25.22, 20.76, 17.65, 16.22, 9.02.

Data for **43**: <sup>1</sup>H NMR 5.14-5.06 (m, 1), 3.755 (br, 1), 3.712 (s, 3), 2.34-2.26 (br, 1, OH), 2.09-1.96 (m, 1), 2.00-1.86 (m, 1), 1.74 (dq, 1, *J* = 14.0, 7.3), 1.76-1.68 (m, 1), 1.68 (s, 3), 1.61 (s, 3), 1.52 (dq, 1, *J* = 13.4, 7.3), 1.54-1.44 (m, 1), 1.37-1.22 (m, 2), 1.20-1.10 (m, 1), 1.095 (s, 3), 0.95 (d, 3, *J* = 6.7), 0.83 (t, 3, *J* = 7.3); <sup>13</sup>C NMR 177.72, 131.19, 124.79, 73.47, 51.73, 51.61, 39.23, 35.61, 29.50, 29.41, 25.72, 25.32, 20.82, 17.65, 16.53, 8.87.

An identical reaction from *N*-Ts-(*R*)-valine afforded 5.0 mg (21%) of **42** contaminated with 15% of **41** and 4.4 mg (18%) of **44** contaminated with 15% of **43**.

Data for **42**: <sup>1</sup>H NMR 5.13-5.06 (m, 1), 3.784 (br d, 1, *J* = 10.4), 3.687 (s, 3), 2.08-1.91 (m, 3, OH), 1.80 (dq, 1, *J* = 14.0, 7.3), 1.73-1.64 (m, 1), 1.68 (s, 3), 1.60 (s, 3), 1.55 (dq, 1, *J* = 14.0, 7.3), 1.47-1.38 (m, 1), 1.34-1.16 (m, 3), 1.119 (s, 3), 0.89 (d, 3, *J* = 6.7), 0.86 (t, 3, *J* = 7.3); <sup>13</sup>C NMR 177.07, 131.15, 124.70, 73.73, 51.60, 51.36, 39.82, 38.19, 29.10, 28.56, 25.70, 25.51, 18.68, 17.64, 16.25, 8.97.

Data for **44**: <sup>1</sup>H NMR 5.13-5.06 (m, 1), 3.760 (br d, 1, *J* = 10.4), 3.712 (s, 3), 2.36-2.27 (m, 1, OH), 2.07-1.90 (m, 2), 1.74 (dq, 1, *J* = 14.0, 7.3), 1.78-1.68 (m, 1), 1.68 (s, 3), 1.60 (s, 3), 1.53 (dq, 1, *J* = 13.4, 7.3), 1.38-1.18 (m, 1), 1.18-1.06 (m, 3), 1.099 (s, 3), 0.90 (d, 3, *J* = 6.7), 0.83 (t, 3, *J* = 7.3); <sup>13</sup>C NMR 177.74, 131.14, 124.72, 73.05, 51.70, 51.49, 38.80, 38.29, 29.41, 28.92, 25.70, 25.54, 18.75, 17.64, 16.58, 8.82.

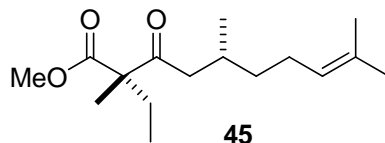

**Methyl (2*S*,5*R*)-2-Ethyl-2,5,9-trimethyl-3-oxo-8-decenoate (45).** Dess-Martin periodinane (15.7 mg, 37  $\mu\text{mol}$ ) was added to a solution of **41** (5.0 mg, 18.5  $\mu\text{mol}$ ) in  $\text{CH}_2\text{Cl}_2$  (1 mL) at 25  $^\circ\text{C}$ . The suspension was stirred at 25  $^\circ\text{C}$  for 12 h. The solvent was removed under reduced pressure at 25  $^\circ\text{C}$ . Flash chromatography on silica gel (40:1 hexanes/EtOAc) gave 4.3 mg (87%) of **45**:  $^1\text{H}$  NMR 5.10-5.04 (m, 1), 3.71 (s, 3), 2.37 (dd, 1,  $J = 17.1, 5.5$ ), 2.26 (dd, 1,  $J = 17.7, 7.9$ ), 2.10-2.00 (m, 1), 2.00-1.89 (m, 3), 1.79 (dq, 1,  $J = 14.0, 7.3$ ), 1.68 (s, 3), 1.59 (s, 3), 1.32-1.24 (m, 1), 1.30 (s, 3), 1.20-1.08 (m, 1), 0.85 (d, 3,  $J = 6.7$ ), 0.82 (t, 3,  $J = 7.3$ );  $^{13}\text{C}$  NMR 207.2, 173.6, 131.4, 124.3, 60.2, 52.2, 45.6, 36.7, 28.2, 27.6, 25.7, 25.5, 19.5, 18.1, 17.6, 8.6.

An identical reaction with **44** also afforded **45**.

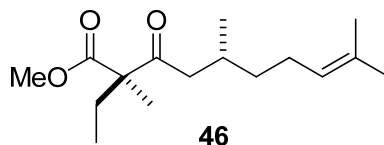

**Methyl (2*R*,5*R*)-2-Ethyl-2,5,9-trimethyl-3-oxo-8-decenoate (46).** An identical reaction with **42** afforded **46**:  $^1\text{H}$  NMR 5.11-5.04 (m, 1), 3.71 (s, 3), 2.41 (dd, 1,  $J = 17.1, 5.5$ ), 2.24 (dd, 1,  $J = 17.7, 7.9$ ), 2.11-2.00 (m, 1), 2.00-1.89 (m, 3), 1.78 (dq, 1,  $J = 14.0, 7.3$ ), 1.68 (s, 3), 1.59 (s, 3), 1.33-1.24 (m, 1), 1.31 (s, 3), 1.19-1.08 (m, 1), 0.86 (d, 3,  $J = 6.7$ ), 0.83 (t, 3,  $J = 7.3$ );  $^{13}\text{C}$  NMR 207.2, 173.6, 131.4, 124.3, 60.1, 52.2, 45.6, 36.7, 28.1, 27.6, 25.7, 25.5, 19.5, 18.2, 17.6, 8.6.

An identical reaction with **43** afforded **46**.

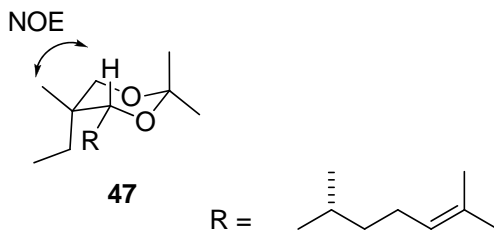



**(4*R*,5*R*)-4-((2*R*)-2,6-Dimethyl-5-hepten-1-yl)-5-ethyl-2,2,5-trimethyl-1,3-dioxane**

**(47).** To a stirred suspension of lithium aluminum hydride (44.5 mg, 1.17 mmol) in ether (1.5 mL) was added a solution of  $\beta$ -hydroxy ester **41** (78.5 mg, 0.29 mmol) in ether (3 mL) under N<sub>2</sub> at 25 °C. The suspension was stirred for 3 h and quenched by slow addition of H<sub>2</sub>O (1 mL). The white precipitate was filtered off through a pad of Celite and rinsed with EtOAc (6  $\times$  5 mL). The organic layer was washed with brine (5 mL), dried (MgSO<sub>4</sub>), and concentrated to give 63.2 mg of diol.

A solution of the diol and TsOH $\cdot$ H<sub>2</sub>O (6.0 mg, 32  $\mu$ mol) in 2,2-dimethoxypropane (2.5 mL) was stirred under N<sub>2</sub> for 40 min. The reaction mixture was diluted with ether (20 mL) and washed with saturated NaHCO<sub>3</sub> (3  $\times$  5 mL). The organic layer was dried (Na<sub>2</sub>SO<sub>4</sub>) and concentrated. Flash chromatography on silica gel (40:1 hexanes/EtOAc) gave 64.4 mg (79%) of **47**: <sup>1</sup>H NMR 5.13-5.06 (m, 1), 3.63 (dd, 1, *J* = 8.5, 2.4), 3.58 (d, 1, *J* = 11.6), 3.40 (d, 1, *J* = 11.6), 2.06-1.88 (m, 2), 1.93 (dq, 1, *J* = 14.0, 7.3), 1.69 (s, 3), 1.61 (s, 3), 1.63-1.51 (m, 1), 1.45-1.37 (m, 1), 1.42 (s, 3), 1.37 (s, 3), 1.32-1.21 (m, 2), 1.15 (dq, 1, *J* = 14.0, 6.7), 1.10-1.00 (m, 1), 0.91 (d, 3, *J* = 6.7), 0.85 (t, 3, *J* = 7.6), 0.62 (s, 3); <sup>13</sup>C NMR 131.1, 124.9, 98.3, 76.4, 67.2, 35.8, 35.7, 35.2, 29.6, 29.2, 25.7, 25.2, 21.4, 20.6, 18.9, 18.4, 17.6, 7.8. A 2D NOESY experiment showed NOEs from the three ring protons at  $\delta$  3.63, 3.58, and 3.40 to the methyl singlet at  $\delta$  0.62. Only the equatorial ring proton at  $\delta$  3.58 showed an NOE to the methyl triplet of the ethyl group at  $\delta$  0.91 and one methylene proton of the ethyl group at  $\delta$  1.93.

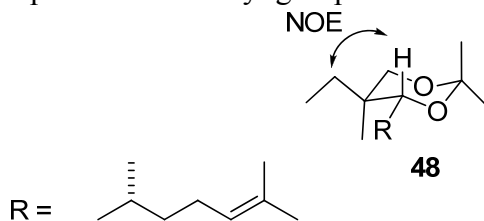**(4*R*,5*S*)-4-((2*R*)-2,6-Dimethyl-5-hepten-1-yl)-5-ethyl-2,2,5-trimethyl-1,3-dioxane**

**(48).** An identical series of reactions with **43** (63.5 mg, 0.24 mmol) afforded 53.7 mg (81%) of **48**: <sup>1</sup>H NMR 5.13-5.06 (m, 1), 3.69-3.62 (m, 2), 3.38 (d, 1, *J* = 11.6), 2.06-1.86 (m, 2), 1.68 (s, 3), 1.61 (s, 3), 1.64-1.55 (m, 1), 1.45-1.37 (m, 1), 1.40 (s, 3), 1.38 (s, 3), 1.30-1.19 (m, 3), 1.13

(dq, 1,  $J = 14.0, 7.3$ ), 1.10-1.00 (m, 1), 0.97 (s, 3), 0.91 (d, 3,  $J = 6.7$ ), 0.80 (t, 3,  $J = 7.3$ );  $^{13}\text{C}$  NMR 131.1, 124.9, 98.2, 74.0, 69.9, 36.0, 35.7, 35.2, 29.4, 29.0, 28.4, 25.7, 25.2, 20.6, 19.1, 17.6, 15.7, 7.2;  $^1\text{H}$  NMR (benzene- $d_6$ ) 5.29-5.20 (m, 1), 3.61 (br d, 1,  $J = 9.8$ ), 3.52 (d, 1,  $J = 11.6$ ), 3.38 (d, 1,  $J = 11.6$ ), 2.16-1.99 (m, 2), 1.86-1.74 (m, 1), 1.70 (s, 3), 1.59 (s, 3), 1.59-1.49 (m, 1), 1.50 (s, 3), 1.39-1.29 (m, 1), 1.34 (s, 3), 1.23-1.10 (m, 2), 1.04 (s, 3), 0.97 (d, 3,  $J = 6.7$ ), 1.09-0.99 (m, 1), 0.89 (dq, 1,  $J = 14.0, 7.3$ ), 0.62 (t, 3,  $J = 7.6$ );  $^{13}\text{C}$  NMR (benzene- $d_6$ ) 131.3, 125.9, 98.7, 74.8, 70.2, 36.9, 36.7, 35.7, 30.2, 29.9, 29.0, 26.3, 26.2, 21.3, 19.6, 18.1, 16.4, 7.7. A 2D NOESY (run in benzene- $d_6$  because two ring protons overlapped in  $\text{CDCl}_3$ ) experiment showed NOEs from all three ring protons at  $\delta$  3.61, 3.52, and 3.38 to the methyl triplet of the ethyl group at  $\delta$  0.62, the ethyl methylene group multiplet at  $\delta$  0.89, and the ethyl methylene group multiplet at  $\delta$  1.09-0.99. Only the equatorial ring proton at  $\delta$  3.38 showed an NOE to the methyl singlet at  $\delta$  1.04.

**Table S1. Comparison of the <sup>1</sup>H NMR Spectral Data Reported for Berkelic Acid Methyl Ester in CDCl<sub>3</sub> with Those of Intermediates **22** and **27a**.**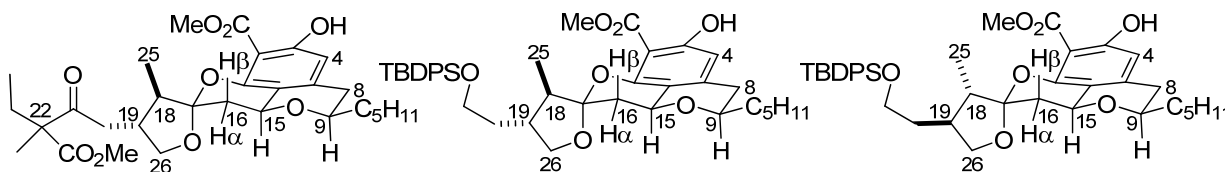

literature data for natural berkelic acid methyl ester with proposed structure shown

**22** with proposed stereochemistry

**27a** with revised stereochemistry at C-18 and C-19

| Atom                         | Berkelic Acid Methyl Ester   | <b>22</b>                    | <b>27a</b>                   |
|------------------------------|------------------------------|------------------------------|------------------------------|
| 4                            | 6.29 (s)                     | 6.32 (s)                     | 6.31 (s)                     |
| 8 $\alpha$                   | 2.77 (m)                     | 2.77 (dd, 17.7, 4.3)         | 2.76 (dd, 17.6, 3.9)         |
| 8 $\beta$                    | 2.56 (dd, 17.4, 11.2)        | 2.61 (dd, 17.7, 11.0)        | 2.60 (dd, 17.6, 10.7)        |
| 9                            | 3.79 (m)                     | 3.79 (m)                     | 3.79 (m)                     |
| 15                           | 4.73 (dd, 12.3, 5.2)         | 4.75 (dd, 12.2, 5.2)         | 4.76 (dd, 12.2, 5.4)         |
| <b>16<math>\alpha</math></b> | <b>2.13 (dd, 12.3, 5.5)</b>  | <b>2.24 (dd, 12.2, 5.2)</b>  | <b>2.16 (dd, 12.2, 5.4)</b>  |
| <b>16<math>\beta</math></b>  | <b>2.05 (dd, 12.3, 12.2)</b> | <b>1.81 (dd, 12.2, 12.2)</b> | <b>1.95 (dd, 12.2, 12.2)</b> |
| <b>18</b>                    | <b>1.83 (m)</b>              | <b>2.24 (m)</b>              | <b>1.73 (m)</b>              |
| 25                           | 1.02 (d, 6.6)                | 1.05 (d, 6.7)                | 1.06 (d, 6.7)                |
| <b>26<math>\alpha</math></b> | <b>4.31 (t, 8.5)</b>         | <b>4.14 (t, 7.8)</b>         | <b>4.25 (t, 8.5)</b>         |
| <b>26<math>\beta</math></b>  | <b>3.44 (t, 8.5)</b>         | <b>3.69 (t, 7.8)</b>         | <b>3.55 (t, 8.5)</b>         |

Shifts in bold show significant differences in the <sup>1</sup>H NMR spectra of **22** and **27a**

**Table S2. Comparison of the <sup>1</sup>H NMR Spectral Data Reported for Berkelic Acid in CDCl<sub>3</sub> with Those of **35** and **36**.<sup>a</sup>**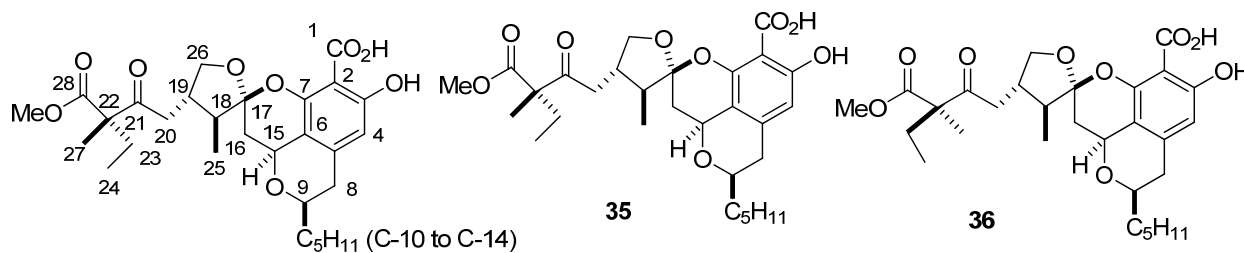

natural berkelic acid showing revised stereochemistry at C-18 and C-19 and assigned stereochemistry at C-22

| Atom                  | Berkelic Acid         | <b>35</b>             | <b>36</b>             |
|-----------------------|-----------------------|-----------------------|-----------------------|
| 4                     | 6.41 (s)              | 6.42 (s)              | 6.42 (s)              |
| 8 $\alpha$            | 2.77 (dd, 17.6, 4.0)  | 2.78 (dd, 17.7, 3.7)  | 2.79 (dd, 17.6, 3.9)  |
| 8 $\beta$             | 2.59 (dd, 17.6, 11.0) | 2.60 (dd, 17.7, 11.0) | 2.60 (dd, 17.6, 11.2) |
| 9                     | 3.80 (m)              | 3.80 (m)              | 3.80 (m)              |
| 10                    | 1.61 (m)              | 1.62 (m)              | 1.62 (m)              |
| 10                    | 1.50 (m)              | 1.50 (m)              | 1.50 (m)              |
| 11                    | 1.50 (m)              | 1.43 (m)              | 1.43 (m)              |
| 12                    | 1.30 (m)              | 1.30 (m)              | 1.30 (m)              |
| 13                    | 1.30 (m)              | 1.30 (m)              | 1.30 (m)              |
| 14                    | 0.88 (t)              | 0.88 (t, 6.6)         | 0.88 (t, 6.6)         |
| 15                    | 4.76 (dd, 12.2, 5.7)  | 4.76 (dd, 12.2, 5.4)  | 4.77 (dd, 12.2, 5.4)  |
| 16 $\alpha$           | 2.20 (dd, 12.2, 5.7)  | 2.21 (dd, 12.2, 5.4)  | 2.21 (dd, 12.2, 5.4)  |
| 16 $\beta$            | 2.05 (dd, 12.2, 12.2) | 2.05 (dd, 12.2, 12.2) | 2.06 (dd, 12.2, 12.2) |
| 18                    | 1.87 (m)              | 1.87 (dq, 10.7, 6.8)  | 1.87 (dq, 11.3, 6.8)  |
| 19                    | 2.50 (m)              | 2.50 (m)              | 2.49 (m)              |
| <b>20<sup>b</sup></b> | 2.84 (dd, 17.0, 2.5)  | 2.85 (dd, 17.0, 2.4)  | 2.90 (dd, 17.6, 2.9)  |
| <b>20<sup>b</sup></b> | 2.42 (dd, 17.0, 10.3) | 2.42 (dd, 17.0, 9.8)  | 2.38 (dd, 17.6, 10.0) |
| 23                    | 1.94 (m)              | 1.95 (dq, 14.2, 7.3)  | 1.95 (dq, 14.2, 7.3)  |
| 23                    | 1.80 (m)              | 1.80 (dq, 14.2, 7.3)  | 1.80 (dq, 14.2, 7.3)  |
| <b>24<sup>b</sup></b> | 0.82 (t, 7.2)         | 0.83 (t, 7.3)         | 0.81 (t, 7.3)         |
| 25                    | 1.08 (d, 6.8)         | 1.09 (d, 6.7)         | 1.09 (d, 6.7)         |
| 26 $\alpha$           | 4.43 (t, 8.8)         | 4.44 (t, 8.5)         | 4.45 (t, 8.5)         |
| 26 $\beta$            | 3.58 (t, 8.8)         | 3.59 (t, 8.5)         | 3.59 (t, 8.5)         |
| <b>27<sup>b</sup></b> | 1.31                  | 1.32                  | 1.33                  |
| OMe                   | 3.73                  | 3.73                  | 3.73                  |
| OH                    | 11.82                 | 11.82                 | 11.83                 |

a) The spectra are referenced to the residual solvent peak at  $\delta$  7.24, not  $\delta$  7.27 to be consistent with the literature data. b) Bold hydrogens have different chemical shifts in **35** and **36**.

**Table S3. Comparison of the <sup>1</sup>H NMR Spectral Data Reported for Berkelic Acid in CD<sub>3</sub>OD with Those of **35** and **36**.**

natural berkelic acid showing revised stereochemistry at C-18 and C-19 and assigned stereochemistry at C-22

| Atom                  | Berkelic Acid                     | <b>35</b>             | <b>36</b>             |
|-----------------------|-----------------------------------|-----------------------|-----------------------|
| 4                     | 6.27 (s)                          | 6.27 (s)              | 6.27 (s)              |
| 8 $\alpha$            | 2.77 (dd, 17.4, 5.3)              | 2.78 (dd, 17.3, 3.7)  | 2.79 (dd, 17.3, 3.6)  |
| 8 $\beta$             | 2.54 (dd, 17.4, 11.0)             | 2.54 (dd, 17.3, 11.2) | 2.55 (dd, 17.3, 10.3) |
| 9                     | 3.79 (m)                          | 3.79 (m)              | 3.79 (m)              |
| 10                    | 1.63 (m)                          | 1.63 (m)              | 1.63 (m)              |
| 10                    | 1.55 (m)                          | 1.55 (m)              | 1.55 (m)              |
| 11                    | 1.55 (m)                          | 1.55 (m)              | 1.55 (m)              |
| 12                    | 1.40 (m)                          | 1.40 (m)              | 1.40 (m)              |
| 13                    | 1.40 (m)                          | 1.40 (m)              | 1.40 (m)              |
| 14                    | 0.92 (t, 6.4)                     | 0.92 (t, 6.8)         | 0.92 (t, 6.8)         |
| 15                    | 4.72 (dd, 12.2, 5.4)              | 4.72 (dd, 12.2, 5.4)  | 4.73 (dd, 12.2, 5.4)  |
| 16 $\alpha$           | 2.16 (dd, 12.4, 5.4)              | 2.14 (dd, 12.2, 5.4)  | 2.14 (dd, 12.2, 5.4)  |
| 16 $\beta$            | 1.9 <sup>a</sup> (dd, 12.4, 12.4) | 1.91 (dd, 12.2, 12.2) | 1.91 (dd, 12.2, 12.2) |
| 18                    | 1.82 (m)                          | 1.82 (m)              | 1.82 (m)              |
| 19                    | 2.66 (m)                          | 2.66 (m)              | 2.66 (m)              |
| <b>20<sup>b</sup></b> | 2.87 (dd, 17.5, 3.0)              | 2.88 (dd, 17.6, 3.1)  | 2.92 (dd, 17.6, 3.0)  |
| <b>20<sup>b</sup></b> | 2.53 (m)                          | 2.53 (dd, 17.6, 10.5) | 2.49 (dd, 17.6, 10.5) |
| 23                    | 1.93 (m)                          | 1.94 (dq, 14.2, 7.3)  | 1.94 (dq, 14.2, 7.3)  |
| 23                    | 1.84 (m)                          | 1.84 (m)              | 1.84 (m)              |
| <b>24<sup>b</sup></b> | 0.83 (t, 7.7)                     | 0.83 (t, 7.6)         | 0.82 (t, 7.3)         |
| 25                    | 1.07 (d, 6.7)                     | 1.08 (d, 6.3)         | 1.08 (d, 6.3)         |
| 26 $\alpha$           | 4.30 (t, 8.3)                     | 4.30 (t, 8.5)         | 4.30 (t, 8.5)         |
| 26 $\beta$            | 3.50 (t, 8.3)                     | 3.50 (t, 8.5)         | 3.50 (t, 8.5)         |
| <b>27<sup>b</sup></b> | 1.32                              | 1.32                  | 1.33                  |
| OMe                   | 3.73                              | 3.73                  | 3.73                  |

a) This peak is reported to absorb at  $\delta$  2.02.<sup>[1]</sup> However, examination of the supporting material indicate that there are no peaks between 2.0 and 2.1 and the COSY and HSQC indicate that this hydrogen absorbs at about  $\delta$  1.9. b) Bold hydrogens have different chemical shifts in **35** and **36**.

**Table S4. Comparison of the  $^{13}\text{C}$  NMR Spectral Data Reported for Berkelic Acid in  $\text{CDCl}_3$  with Those of **35** and **36**.**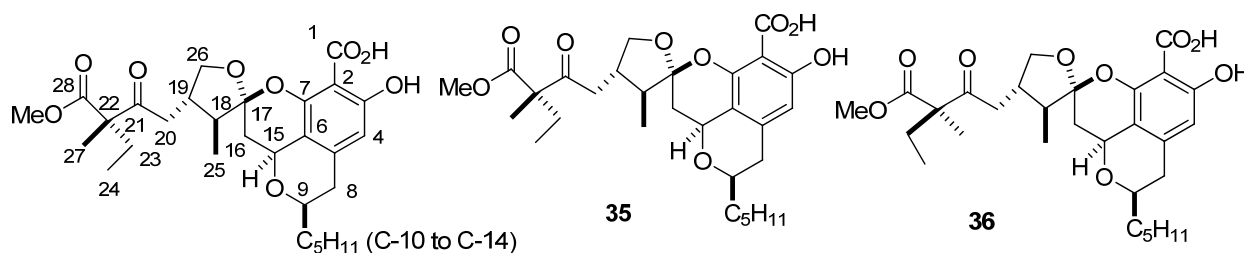

natural berkelic acid showing revised stereochemistry at C-18 and C-19 and assigned stereochemistry at C-22

| Atom | Berkelic Acid | <b>35</b>      | <b>36</b>        |
|------|---------------|----------------|------------------|
| 1    | 170.5         | 170.5          | 170.5            |
| 2    | 98.6          | 98.6           | 98.6             |
| 3    | 162.5         | 162.5          | 162.5            |
| 4    | 110.5         | 110.5          | 110.5            |
| 5    | 142.3         | 142.2          | 142.2            |
| 6    | 112.2         | 112.2          | 112.17 or 112.15 |
| 7    | 149.8         | 149.8          | 149.8            |
| 8    | 34.3          | 34.30 or 34.29 | 34.31 or 34.29   |
| 9    | 75.2          | 75.2           | 75.2             |
| 10   | 36.2          | 36.2           | 36.2             |
| 11   | 25.1          | 25.0           | 25.0             |
| 12   | 31.7          | 31.8           | 31.8             |
| 13   | 22.6          | 22.6           | 22.6             |
| 14   | 14.0          | 14.0           | 14.0             |
| 15   | 67.2          | 67.2           | 67.2             |
| 16   | 34.2          | 34.30 or 34.29 | 34.31 or 34.29   |
| 17   | 112.2         | 112.2          | 112.17 or 112.15 |
| 18   | 48.2          | 48.2           | 48.2             |
| 19   | 39.3          | 39.4           | 39.3             |
| 20   | 41.6          | 41.6           | 41.5             |
| 21   | 206.1         | 206.0          | 206.0            |
| 22   | 59.7          | 59.7           | 59.7             |
| 23   | 27.9          | 27.9           | 27.9             |
| 24   | 8.7           | 8.7            | 8.6              |
| 25   | 12.0          | 12.0           | 12.0             |
| 26   | 73.5          | 73.5           | 73.5             |
| 27   | 18.4          | 18.4           | 18.3             |
| 28   | 173.4         | 173.4          | 173.4            |
| OMe  | 52.5          | 52.5           | 52.6             |

**Table S5. Comparison of the  $^{13}\text{C}$  NMR Spectral Data Reported for Berkelic Acid in  $\text{CD}_3\text{OD}$  with Those of **35** and **36**.**

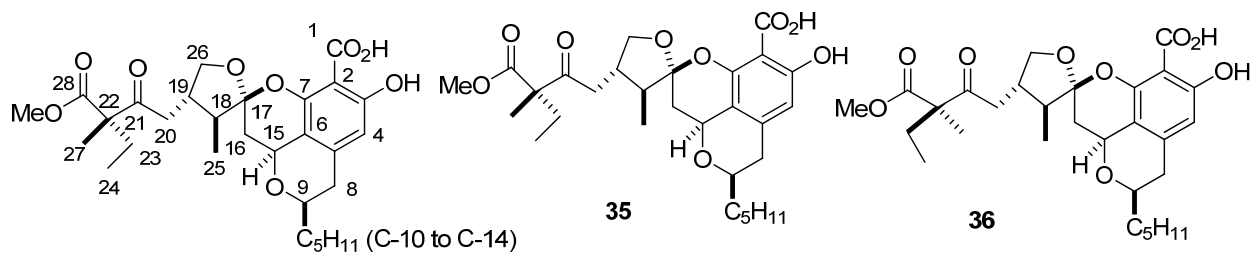

natural berkelic acid showing revised stereochemistry at C-18 and C-19 and assigned stereochemistry at C-22

| Atom | Berkelic Acid | <b>35</b>                          | <b>36</b>                          |
|------|---------------|------------------------------------|------------------------------------|
| 1    | 173.6         | 173.7                              | 173.6                              |
| 2    | 101.0         | 101.1                              | 101.1                              |
| 3    | 163.4         | 163.4                              | 163.4                              |
| 4    | 109.4         | 109.4                              | 109.4                              |
| 5    | 142.3         | 142.3                              | 142.3                              |
| 6    | 113.7         | 113.8                              | 113.8                              |
| 7    | 153.0         | 153.1                              | 153.1                              |
| 8    | 35.4          | 35.4                               | 35.4                               |
| 9    | 76.5          | 76.6                               | 76.6                               |
| 10   | 37.4          | 37.4                               | 37.4                               |
| 11   | 26.2          | 26.2                               | 26.2                               |
| 12   | 33.0          | 33.0                               | 33.0                               |
| 13   | 23.7          | 23.7                               | 23.7                               |
| 14   | 14.4          | 14.4                               | 14.4                               |
| 15   | 69.4          | 69.5                               | 69.5                               |
| 16   | 35.0          | 35.0                               | 35.0                               |
| 17   | 110.7         | 110.7                              | 110.7                              |
| 18   | 49.2          | obscured by $\text{CD}_3\text{OD}$ | obscured by $\text{CD}_3\text{OD}$ |
| 19   | 40.4          | 40.5                               | 40.5                               |
| 20   | 42.6          | 42.6                               | 42.6                               |
| 21   | 208.7         | 208.8                              | 208.7                              |
| 22   | 61.0          | 61.0                               | 61.0                               |
| 23   | 28.9          | 28.9                               | 28.8                               |
| 24   | 9.0           | 9.0                                | 8.9                                |
| 25   | 11.9          | 11.9                               | 11.9                               |
| 26   | 74.1          | 74.2                               | 74.1                               |
| 27   | 19.0          | 18.9                               | 18.8                               |
| 28   | 174.8         | 174.8                              | 174.8                              |
| OMe  | 52.9          | 52.9                               | 52.9                               |

### Assignment of C-22 Stereochemistry

The Kiyooka aldol reaction leads to two, rather than four, aldol products making it possible to isolate pure **33** and **34**. Unfortunately, this reaction controls the stereochemistry at the alcohol center (C-21), which is lost in the Dess-Martin oxidation, rather than at C-22. Using reagent **32** derived from (*S*)-valine, the enol ether always approaches from the *Si*-face to afford adducts **33** and **34** with *R*-stereochemistry at C-21.<sup>[22]</sup> The <sup>1</sup>H and <sup>13</sup>C NMR spectra of alcohols **33** and **34** are slightly different, but these differences can't be used to assign their stereochemistry. We therefore prepared a series of analogues of known stereochemistry with the hope that the spectral differences between these analogues and compounds **33** and **34** were sufficiently consistent to permit us to assign the stereochemistry of **33** and **34** at C-22.

The analogues were prepared from (*R*)-citronellal (**37**) (see Scheme 8). Addition of **37** to the lithium enolate of methyl butyrate afforded **38**, which was converted to the alkoxy enolates **39** and **40**, which were treated with MeI as described by Fráter<sup>[23]</sup> to give 16% of a 1:1 mixture of **41** and **42**. Chelation in **39** and **40** controls the geometry so that methylation occurs primarily from the face opposite the alkyl group. This sequence typically proceeds with excellent relative stereocontrol, but in poor yield<sup>[24]</sup> so that it isn't practical to use it with aldehyde **30** to prepare berkeley acid. We also converted **37** and **31** by Kiyooka's procedure<sup>[19]</sup> to **41** (38%) and **43** (41%) using *N*-Ts-(*S*)-valine and to **42** (21%) and **44** (18%) using *N*-Ts-(*R*)-valine. Kiyooka's procedure controls the stereochemistry at C-3 well, but doesn't control C-2. The compound produced by both Fráter's procedure and Kiyooka's procedure using *N*-Ts-(*S*)-valine must be **41**. Therefore, the other isomer produced from Kiyooka's procedure using *N*-Ts-(*S*)-valine must be **43**. The compound produced by both Fráter's procedure and Kiyooka's procedure using *N*-Ts-(*R*)-valine must be **42**. Therefore, the other isomer produced from Kiyooka's procedure using *N*-Ts-(*R*)-valine must be **44**.

The structure assignments of **41-44** should be secure, but were confirmed by Dess-Martin oxidation of **41** and **44** to keto ester **45** and of **42** and **43** to keto ester **46**, and by conversion of **41**



and **43** to ketals **47** and **48**, respectively, whose stereochemistry was established by NOE studies.<sup>[25]</sup> At this point, the structures of **41-44** were secure. The only remaining assumption regards the face of the aldehyde that is attacked, which has been established by Kiyooka and others in numerous examples.<sup>[19,22]</sup>

We then compared the spectral data of **41-44** and **33** and **34**. The subtle differences in the <sup>1</sup>H and <sup>13</sup>C NMR spectra of (2*1R*,2*2S*)-**33**, (2*S*,3*R*)-**41**, (2*R*,3*S*)-**42** on the one hand and (2*1R*,2*2R*)-**34**, (2*R*,3*R*)-**43**, and (2*S*,3*S*)-**42** on the other hand are identical in all 10 features that we can distinguish as shown in Tables S6 and S7 suggesting that the stereochemistry of **33** and **34** can be assigned as shown by analogy to that of **41-44**. The chromatographic properties also support this assignment: **33** is less polar than **34**, **41** is less polar than **43**, and **42** is less polar than **44**.

### References

- [22] K. Ishiwara and H. Yamamoto in *Modern Aldol Reactions, Vol. 2: Metal Catalysis* (Ed.; R. Mahrwald) Wiley-VCH, Weinheim, 2004, pp 25-68.
- [23] a) G. Fráter, U. Müller, W. Günther, *Tetrahedron* **1984**, *40*, 1269-1277; b) G. Fráter, *Helv. Chem. Acta* **1979**, *62*, 2825-2828.
- [24] E. Tayama, R. Hashimoto, *Tetrahedron Lett.* **2007**, *48*, 7950-7952.
- [25] For analogous NOE studies on a related ketal, see: R. A. N. C. Crump, I. Fleming, J. H. M. Hill, D. Parker, N. L. Reddy, D. Waterson, *J. Chem. Soc. Perkin Trans. 1* **1992**, 3277-3294.

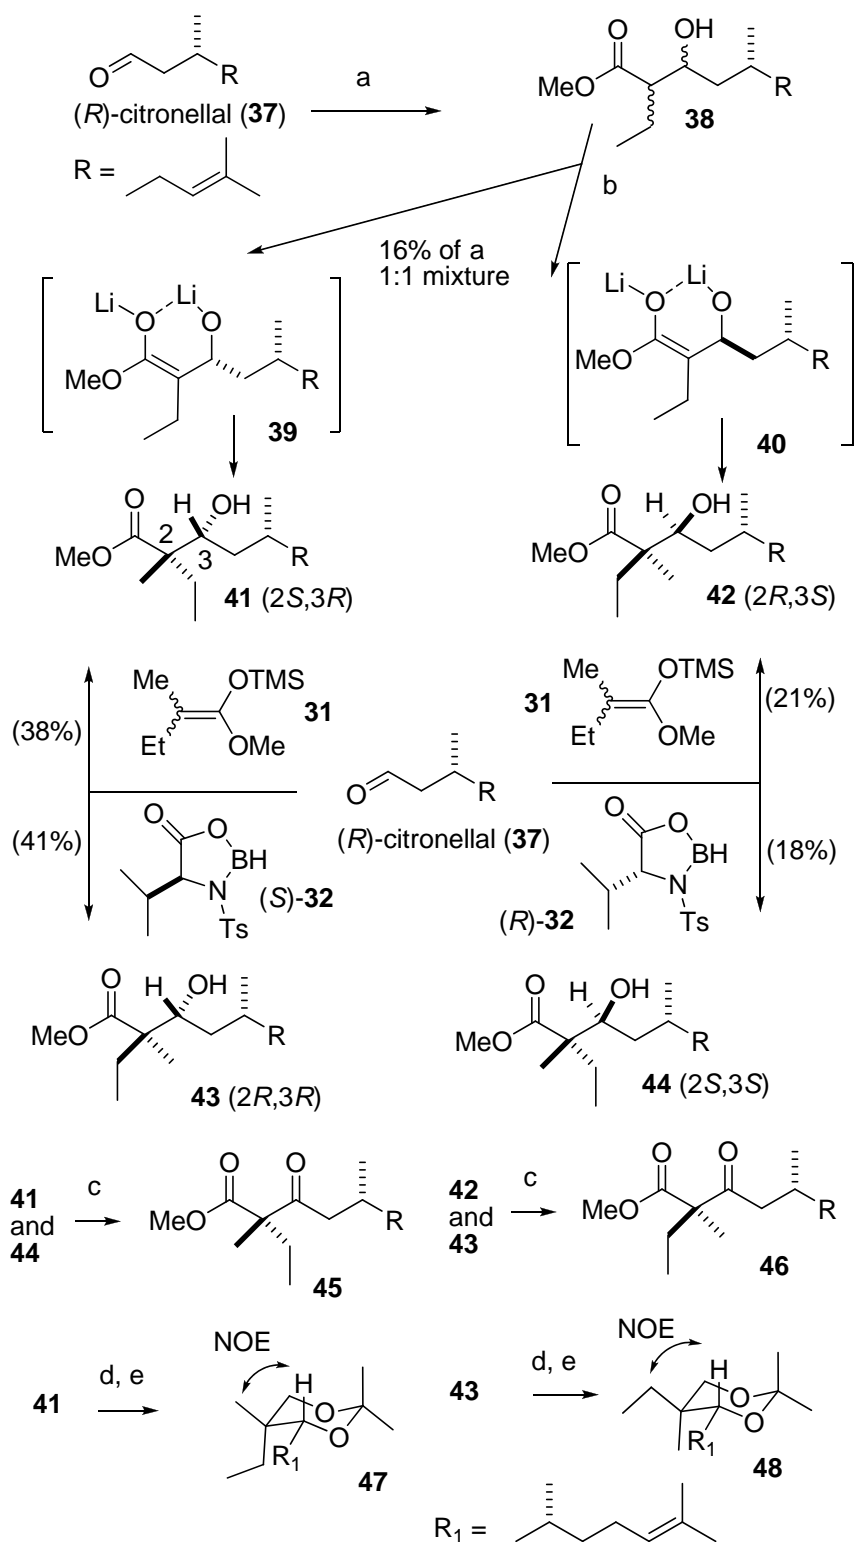

**Scheme 8.** Reagents and conditions: a) methyl butanoate, LDA, THF,  $-78$   $^{\circ}\text{C}$ , 1 h, add **37**,  $-78$  to  $-70$   $^{\circ}\text{C}$ , 2 h (86%); b) 2 equiv LDA, THF,  $-50$  to  $-20$   $^{\circ}\text{C}$ , 90 min, then MeI, HMPA,  $-20$  to  $25$   $^{\circ}\text{C}$ ; c) Dess-Martin (87%); d) LAH, ether,  $25$   $^{\circ}\text{C}$ , 3 h; e) 2,2-dimethoxypropane, TsOH,  $25$   $^{\circ}\text{C}$ , 40 min (79% of **47** from **41**, 81% of **48** from **43**).

**Table S6. Comparison of the  $^{13}\text{C}$  and  $^1\text{H}$  NMR Spectral Data Reported for Citronellal-derived Hydroxy Esters 41-44.**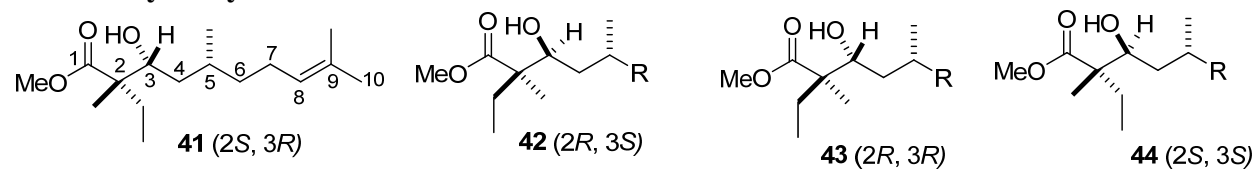

| C (Roman) <sup>a</sup>         | <b>41</b>                 | <b>42</b>                 | <b>43</b>                 | <b>44</b>                 |
|--------------------------------|---------------------------|---------------------------|---------------------------|---------------------------|
| <i>H(Italics)</i> <sup>a</sup> | (2 <i>S</i> ,3 <i>R</i> ) | (2 <i>R</i> ,3 <i>S</i> ) | (2 <i>R</i> ,3 <i>R</i> ) | (2 <i>S</i> ,3 <i>S</i> ) |

|                         |             |             |             |             |                                                                             |
|-------------------------|-------------|-------------|-------------|-------------|-----------------------------------------------------------------------------|
| 1                       | 177.05      | 177.07      | 177.72      | 177.74      | (2 <i>R</i> ,3 <i>R</i> ) and (2 <i>S</i> ,3 <i>S</i> ) 0.7 ppm downfield   |
| 2                       | 51.6*       | 51.6*       | 51.73*      | 51.70*      |                                                                             |
| 2-Me                    | 16.21       | 16.25       | 16.53       | 16.58       | (2 <i>R</i> ,3 <i>R</i> ) and (2 <i>S</i> ,3 <i>S</i> ) 0.3 ppm downfield   |
| 2-Me                    | <i>1.11</i> | <i>1.12</i> | <i>1.09</i> | <i>1.10</i> | (2 <i>R</i> ,3 <i>R</i> ) and (2 <i>S</i> ,3 <i>S</i> ) 0.02 ppm upfield    |
| 2-Et (CH <sub>2</sub> ) | 28.57       | 28.56       | 29.41       | 29.41       | (2 <i>R</i> ,3 <i>R</i> ) and (2 <i>S</i> ,3 <i>S</i> ) 0.85 ppm downfield  |
| 2-Et (CH <sub>3</sub> ) | 9.0         | 9.0         | 8.87        | 8.82        | (2 <i>R</i> ,3 <i>R</i> ) and (2 <i>S</i> ,3 <i>S</i> ) 0.15 ppm upfield    |
| 2-Et (CH <sub>3</sub> ) | <i>0.85</i> | <i>0.86</i> | <i>0.83</i> | <i>0.83</i> | (2 <i>R</i> ,3 <i>R</i> ) and (2 <i>S</i> ,3 <i>S</i> ) 0.025 ppm upfield   |
| OMe                     | 51.4*       | 51.4*       | 51.6*       | 51.5*       |                                                                             |
| OMe                     | 3.69        | 3.69        | 3.71        | 3.71        | (2 <i>R</i> ,3 <i>R</i> ) and (2 <i>S</i> ,3 <i>S</i> ) 0.02 ppm downfield  |
| 3                       | 74.09       | 73.73       | 73.47       | 73.05       | (2 <i>R</i> ,3 <i>R</i> ) and (2 <i>S</i> ,3 <i>S</i> ) 0.6-0.7 ppm upfield |
| 3                       | 3.79        | 3.78        | 3.76        | 3.76        | (2 <i>R</i> ,3 <i>R</i> ) and (2 <i>S</i> ,3 <i>S</i> ) 0.02 ppm upfield    |
| 4                       | 40.16       | 39.82       | 39.23       | 38.80       | (2 <i>R</i> ,3 <i>R</i> ) and (2 <i>S</i> ,3 <i>S</i> ) 0.9-1.0 ppm upfield |
| 5                       | 29.60       | 29.10       | 29.50       | 28.92       | (3 <i>R</i> ) 0.5 ppm downfield                                             |
| 5-Me                    | 20.76       | 18.68       | 20.82       | 18.75       | (3 <i>R</i> ) 2.1 ppm downfield                                             |
| 5-Me                    | <i>0.94</i> | <i>0.89</i> | <i>0.95</i> | <i>0.90</i> | (3 <i>R</i> ) 0.05 ppm downfield                                            |
| 6                       | 35.52       | 38.19       | 35.61       | 38.29       | (3 <i>R</i> ) 2.7 ppm upfield                                               |
| 7                       | 25.2        | 25.5        | 25.3        | 25.5        |                                                                             |
| 8                       | 124.8       | 124.7       | 124.8       | 124.7       |                                                                             |
| 9                       | 131.2       | 131.2       | 131.2       | 131.1       |                                                                             |
| 10                      | 25.7        | 25.7        | 25.7        | 25.7        |                                                                             |
| 9-Me                    | 17.6        | 17.6        | 17.6        | 17.6        |                                                                             |

\* Data for C-2 and the OMe group may be switched. a)  $^{13}\text{C}$  NMR data are in roman type and  $^1\text{H}$  NMR data are in italic type.

**Table S7. Comparison of the  $^{13}\text{C}$  and  $^1\text{H}$  NMR Spectral Data Reported for Berkelic Acid Intermediates **33** and **34**.**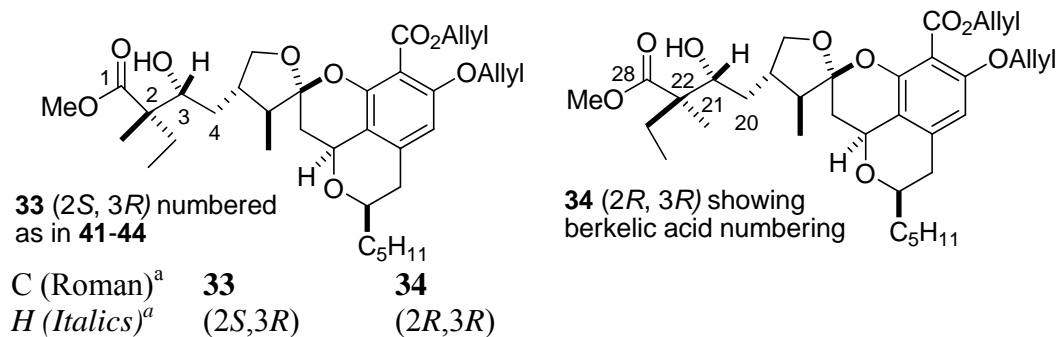

| C (Roman) <sup>a</sup>          | <b>33</b>        | <b>34</b>        |                                      |
|---------------------------------|------------------|------------------|--------------------------------------|
| <i>H (Italics)</i> <sup>a</sup> | ( <i>2S,3R</i> ) | ( <i>2R,3R</i> ) |                                      |
| 1                               | 176.94           | 177.58           | ( <i>2R,3R</i> ) 0.64 ppm downfield  |
| 2-Me                            | 16.75            | 16.94            | ( <i>2R,3R</i> ) 0.19 ppm downfield  |
| 2-Me                            | <i>1.14</i>      | <i>1.13</i>      | ( <i>2R,3R</i> ) 0.01 ppm upfield    |
| 2-Et (CH <sub>2</sub> )         | 28.38            | 29.60            | ( <i>2R,3R</i> ) 1.22 ppm downfield  |
| 2-Et (CH <sub>3</sub> )         | 8.99             | 8.80             | ( <i>2R,3R</i> ) 0.19 ppm upfield    |
| 2-Et (CH <sub>3</sub> )         | <i>0.87</i>      | <i>0.85</i>      | ( <i>2R,3R</i> ) 0.02 ppm upfield    |
| OMe                             | 3.709            | 3.726            | ( <i>2R,3R</i> ) 0.017 ppm downfield |
| 3                               | 76.22            | 75.49            | ( <i>2R,3R</i> ) 0.73 ppm upfield    |
| 3                               | 3.73             | 3.70             | ( <i>2R,3R</i> ) 0.03 ppm upfield    |
| 4                               | 35.31            | 34.57            | ( <i>2R,3R</i> ) 0.74 ppm upfield    |

a)  $^{13}\text{C}$  NMR data are in roman type and  $^1\text{H}$  NMR data are in italic type.

wxx-9-15-e33

Pulse Sequence: s2pul

Solvent: CDCl3

Ambient temperature

File: wxx-9-15-e33\_110308

INOVA-500 "gambie"

Pulse 46.1 degrees

Acq. time 1.638 sec

Width 8000.0 Hz

500 repetitions

OBSERVE H1, 399.7857971 MHz

DATA PROCESSING

FT size 32768

Total time 13 min, 44 sec

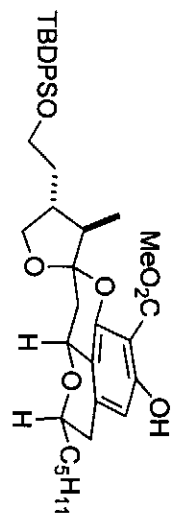

**22**  
400 MHz (CDCl<sub>3</sub>)

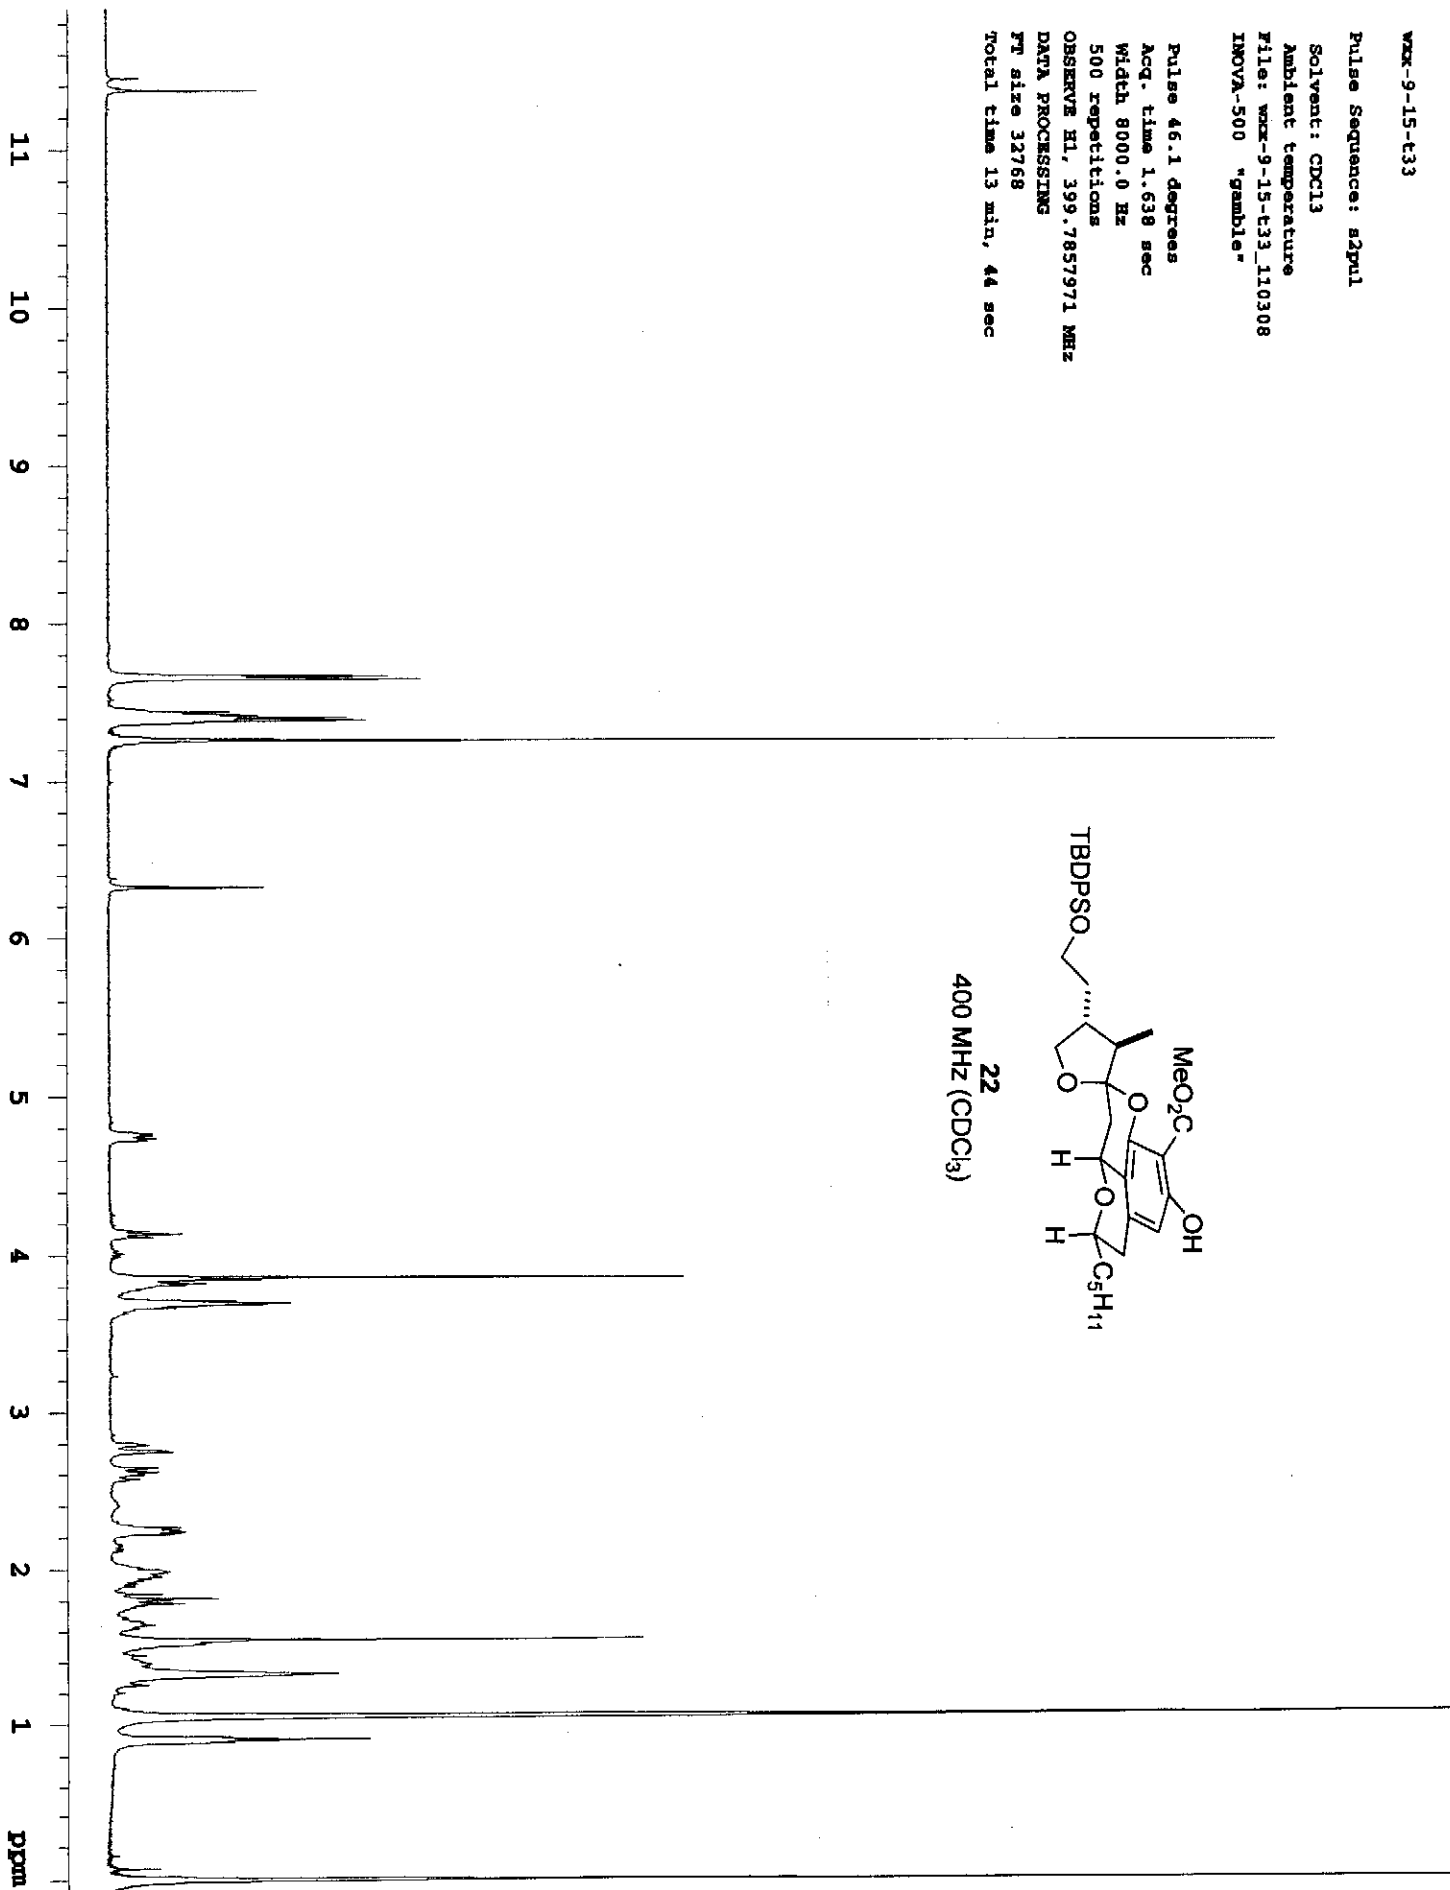

WXX-10-57-2

Pulse Sequence: s2pul

Solvent: CDCl<sub>3</sub>

Ambient temperature

File: WXX-10-57-2

INOVA-500 "gamble"

Pulse 46.1 degrees

Acq. time 1.638 sec

Width 8000.0 Hz

27 repetitions

OBSERVE F1, 399.7857971 MHz

DATA PROCESSING

F1 size 32768

Total time 3 min, 31 sec

27a  
400 MHz (CDCl<sub>3</sub>)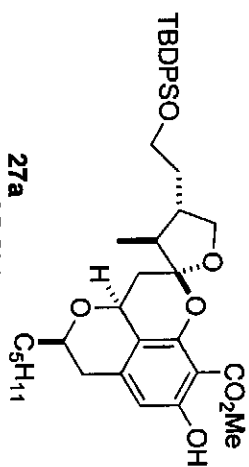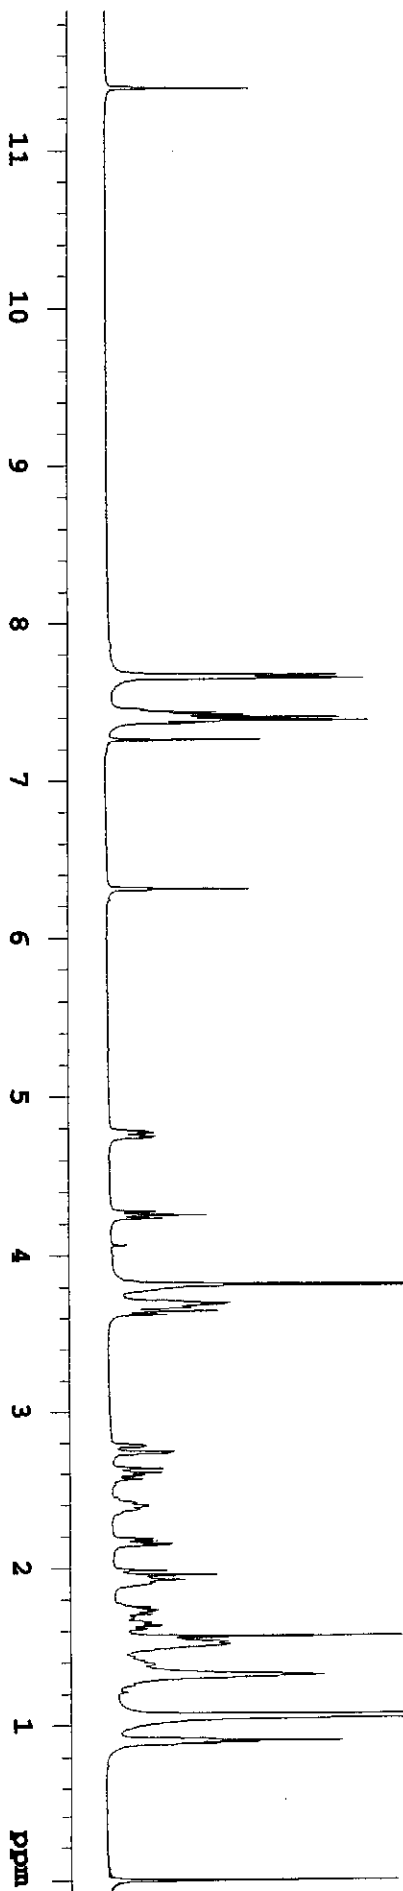

WXX-10-25-t21-30 C\_2nd

| INDEX | FREQUENCY | PPM     | HEIGHT |
|-------|-----------|---------|--------|
| 1     | 17252.086 | 171.618 | 14.7   |
| 2     | 16294.597 | 162.093 | 24.5   |
| 3     | 15286.754 | 152.067 | 11.8   |
| 4     | 14202.617 | 141.283 | 21.3   |
| 5     | 13620.494 | 135.492 | 175.3  |
| 6     | 13422.130 | 133.519 | 32.6   |
| 7     | 13037.608 | 129.694 | 57.3   |
| 8     | 13039.134 | 129.709 | 58.8   |
| 9     | 12833.903 | 127.667 | 141.1  |
| 10    | 11327.861 | 112.686 | 16.7   |
| 11    | 10950.969 | 108.936 | 29.4   |
| 12    | 10887.645 | 108.307 | 33.8   |
| 13    | 10041.545 | 99.890  | 14.2   |
| 14    | 7772.563  | 77.319  | 43.0   |
| 15    | 7740.519  | 77.000  | 44.9   |
| 16    | 7708.476  | 76.681  | 44.1   |
| 17    | 7545.207  | 75.057  | 32.8   |
| 18    | 7386.516  | 73.478  | 30.3   |
| 19    | 6854.747  | 68.189  | 31.6   |
| 20    | 6357.310  | 63.240  | 33.3   |
| 21    | 5225.108  | 51.978  | 30.6   |
| 22    | 4922.221  | 48.965  | 40.6   |
| 23    | 4179.118  | 41.572  | 40.6   |
| 24    | 3651.164  | 36.321  | 40.4   |
| 25    | 3567.241  | 35.486  | 32.9   |
| 26    | 3469.584  | 34.514  | 32.5   |
| 27    | 3416.942  | 33.991  | 31.4   |
| 28    | 3193.400  | 31.767  | 46.3   |
| 29    | 2695.964  | 26.819  | 137.6  |
| 30    | 2522.014  | 25.088  | 43.0   |
| 31    | 2271.006  | 22.591  | 41.0   |
| 32    | 1921.580  | 19.115  | 27.7   |
| 33    | 1411.174  | 14.038  | 35.7   |
| 34    | 1173.137  | 11.670  | 34.0   |

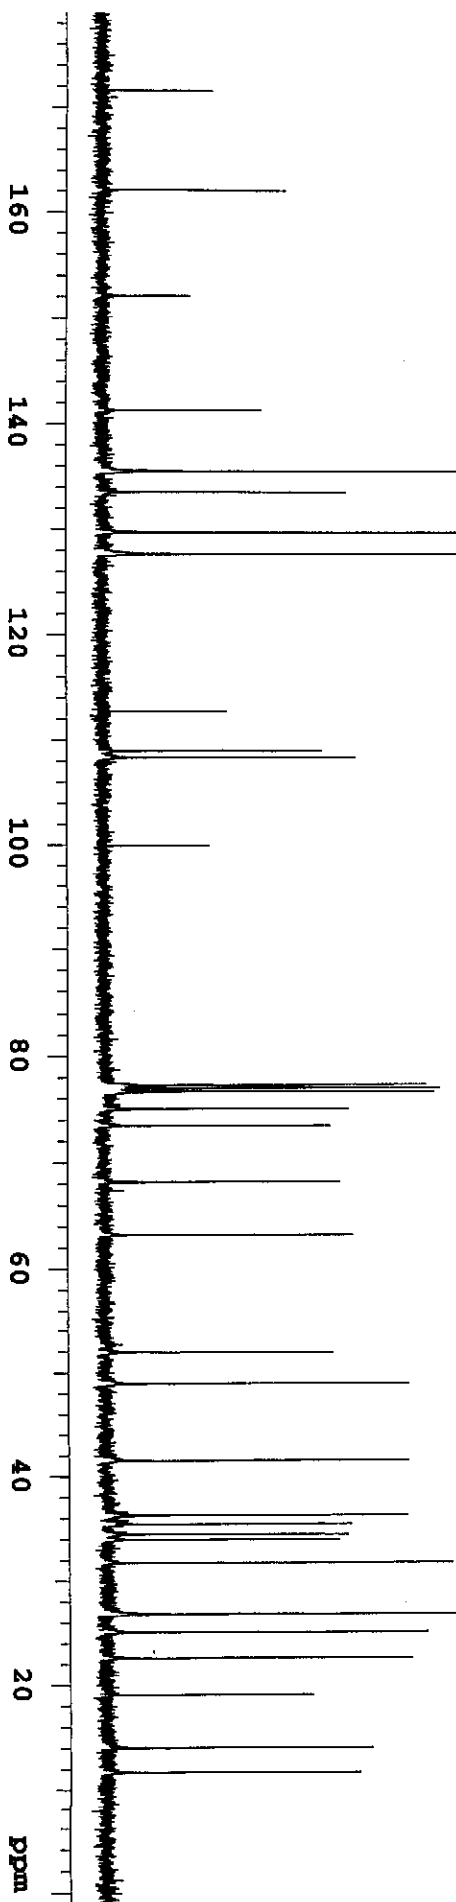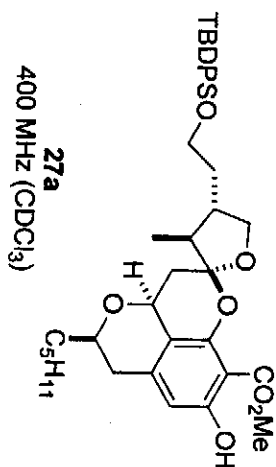

WXR-10-51-4

Pulse Sequence: s2pul  
Solvent: CDCl3  
Ambient temperature  
INOVA-400 "fid"

Pulse 46.1 degrees  
Acq. time 1.638 sec  
Width 8000.0 Hz  
17 repetitions  
OBSERVE H1, 399.7858088 MHz  
DATA PROCESSING  
FT size 32768  
Total time 3 min, 30 sec

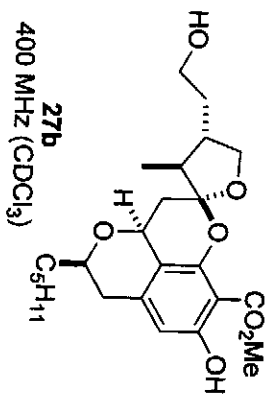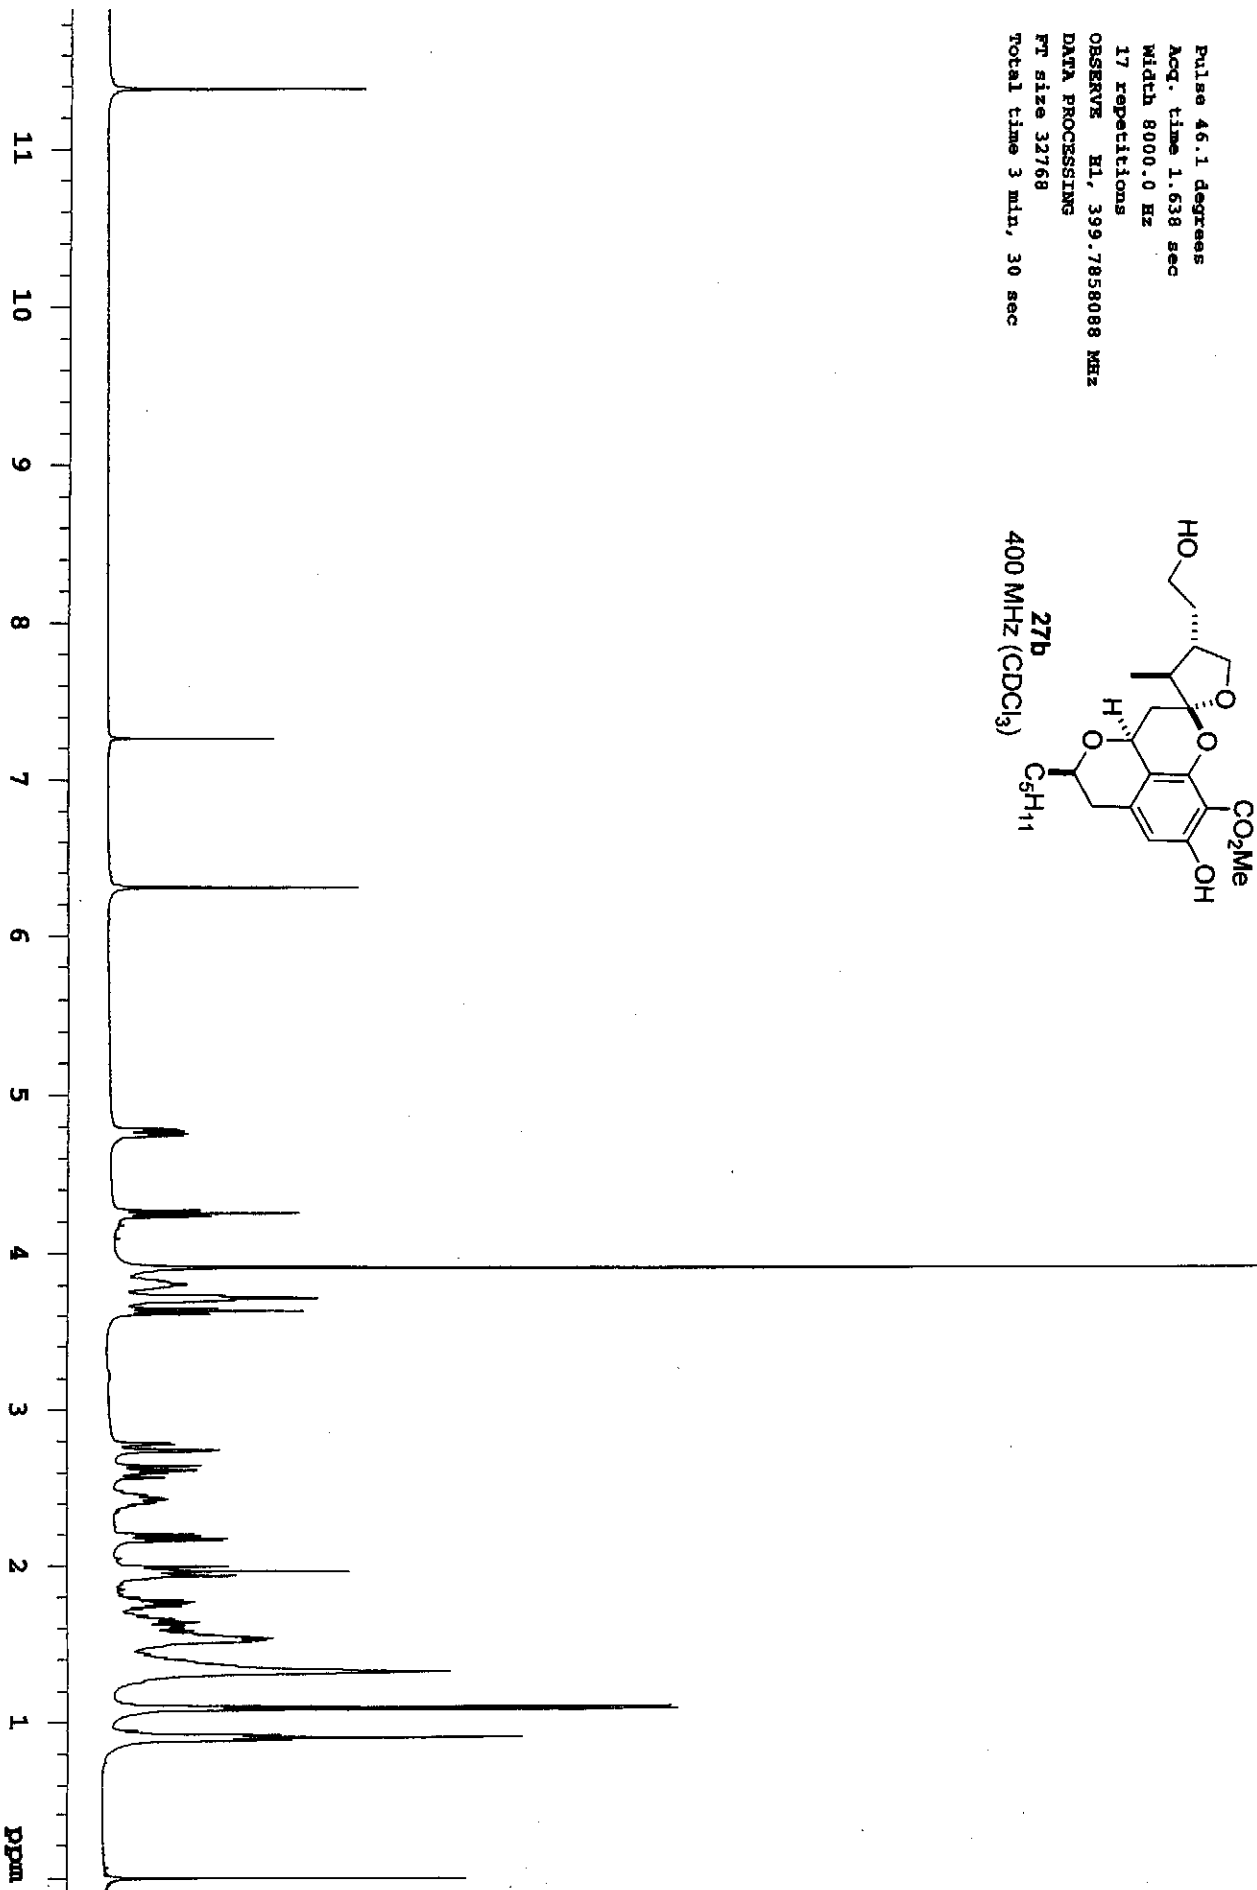



WXX-10-51-t19-20c

| INDEX | FREQUENCY | PPM     | BRIGHT |
|-------|-----------|---------|--------|
| 1     | 17249.034 | 171.587 | 20.1   |
| 2     | 16292.308 | 162.070 | 32.0   |
| 3     | 15284.465 | 152.045 | 16.8   |
| 4     | 14204.142 | 141.298 | 28.6   |
| 5     | 11327.861 | 112.686 | 23.1   |
| 6     | 10963.938 | 109.065 | 54.9   |
| 7     | 10889.170 | 108.322 | 55.9   |
| 8     | 10040.782 | 99.882  | 21.6   |
| 9     | 7772.563  | 77.319  | 129.1  |
| 10    | 7740.519  | 77.000  | 132.9  |
| 11    | 7708.476  | 76.681  | 128.7  |
| 12    | 7546.733  | 75.072  | 50.8   |
| 13    | 7349.131  | 73.107  | 51.8   |
| 14    | 6850.169  | 68.143  | 52.1   |
| 15    | 6217.692  | 61.851  | 62.9   |
| 16    | 5231.974  | 52.046  | 50.4   |
| 17    | 4911.540  | 48.858  | 62.9   |
| 18    | 4103.587  | 40.821  | 69.7   |
| 19    | 3651.164  | 36.321  | 62.1   |
| 20    | 3551.982  | 35.334  | 56.2   |
| 21    | 3468.821  | 34.507  | 56.4   |
| 22    | 3407.023  | 33.892  | 52.9   |
| 23    | 3194.163  | 31.774  | 64.3   |
| 24    | 2522.013  | 25.088  | 66.3   |
| 25    | 2271.006  | 22.591  | 55.7   |
| 26    | 1411.174  | 14.038  | 54.0   |
| 27    | 1176.188  | 11.700  | 51.5   |

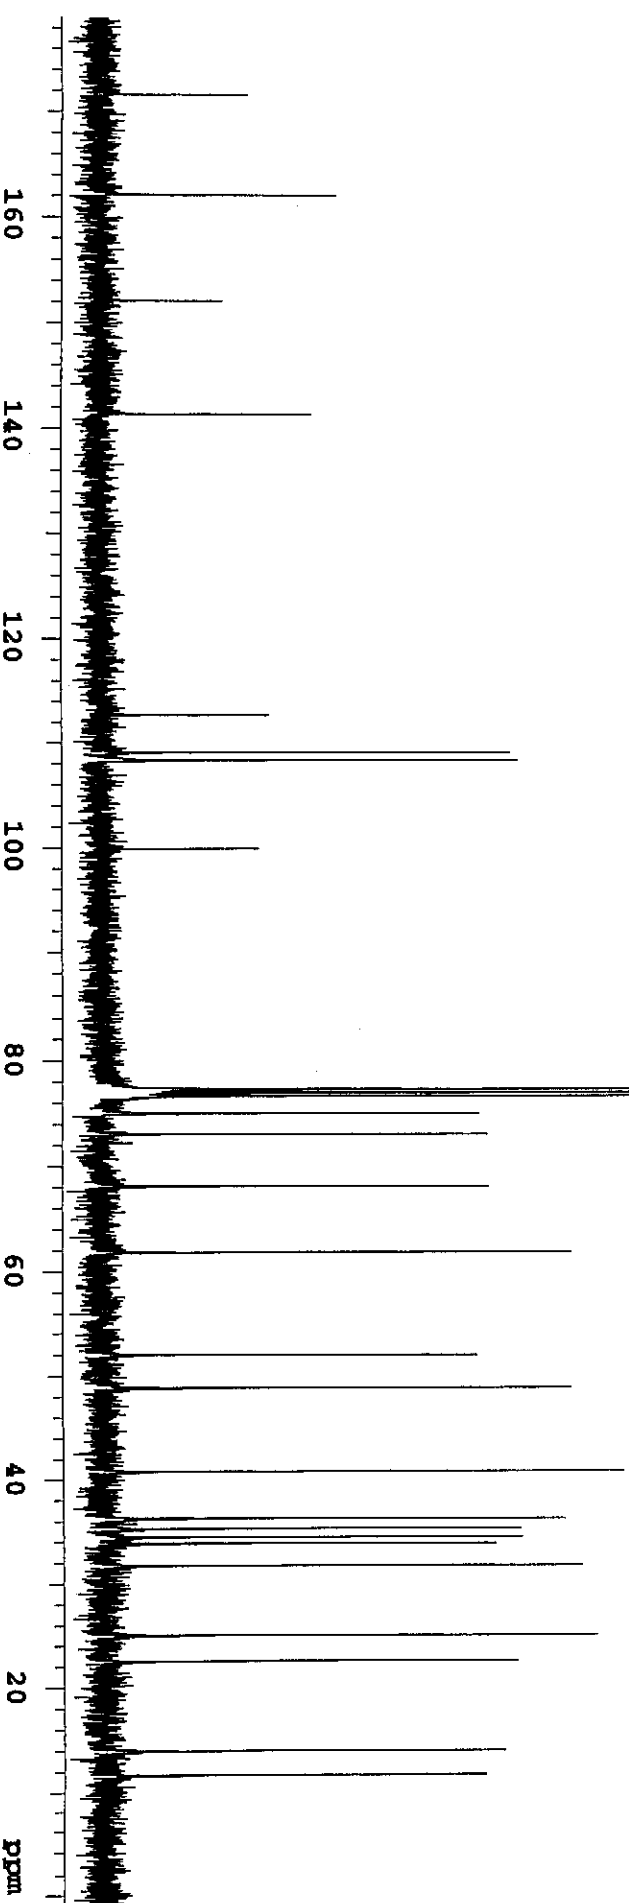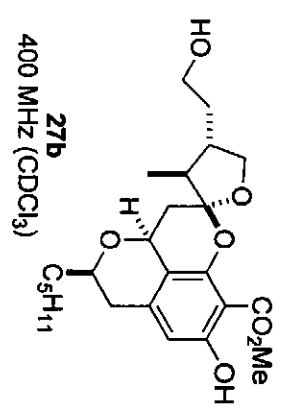

wck-10-143-10

Pulse Sequence: s2pu1

Solvent: CDCl3

Ambient temperature

File: wck-10-143-10

INOVA-500 "gambler"

Pulse 46.1 degrees

Acq. time 1.638 sec

Width 5000.0 Hz

19 repetitions

OBSERVE H1, 399.7858276 MHz

DATA PROCESSING

FT size 16384

Total time 3 min, 31 sec

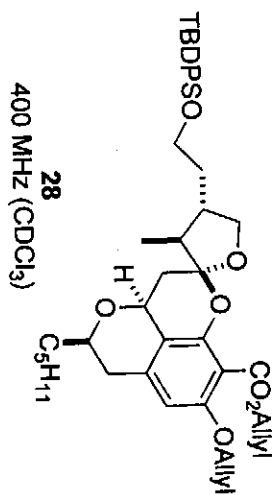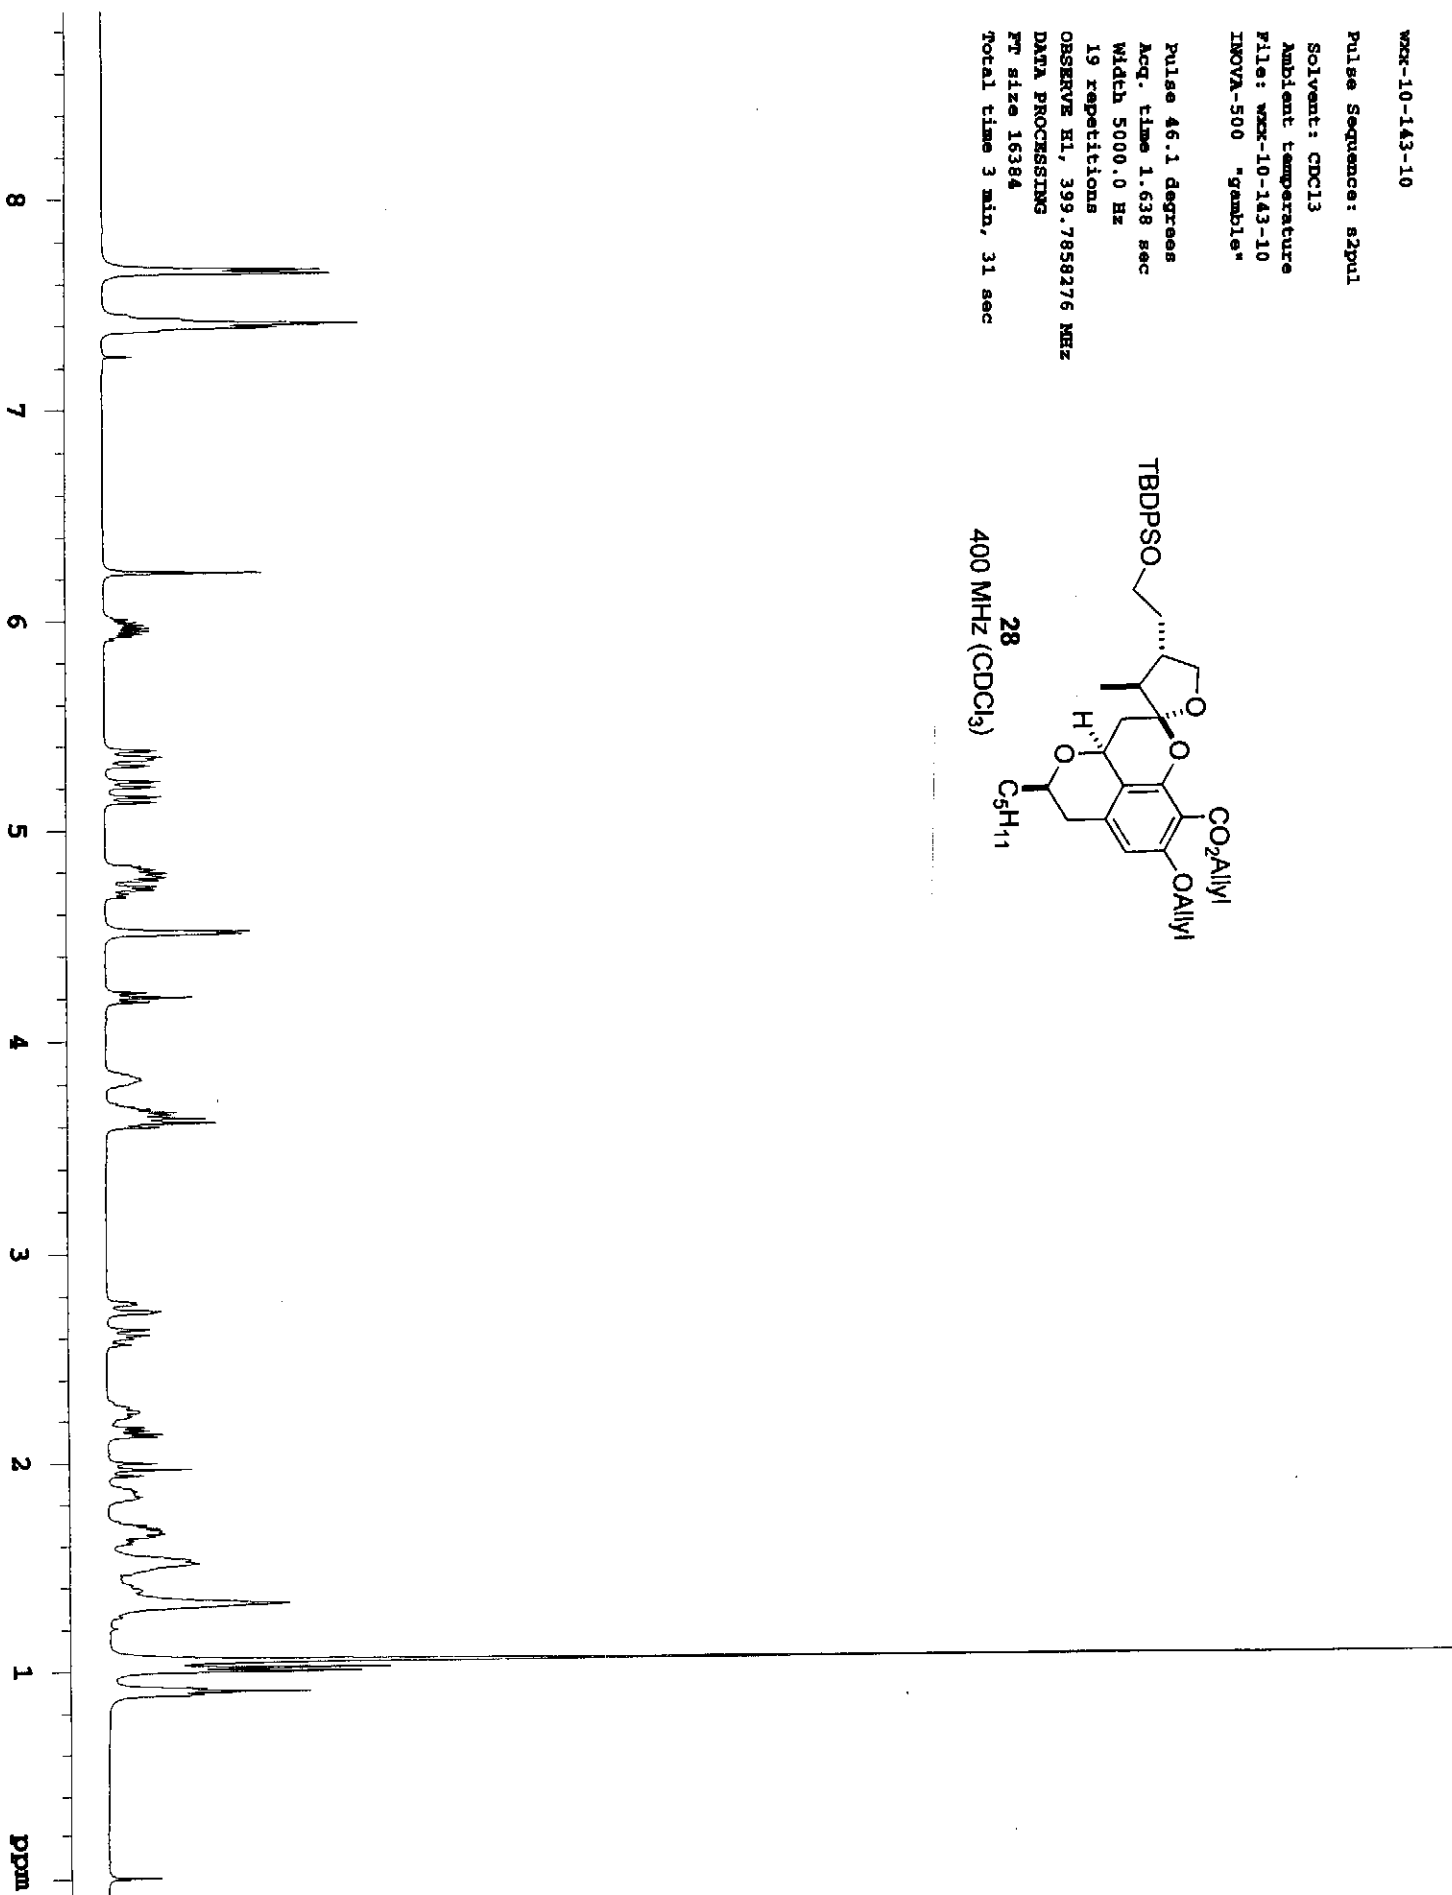

NXY-10-143-10C

| INDEX | FREQUENCY | PPM     | HEIGHT | INDEX | FREQUENCY | PPM     | HEIGHT |
|-------|-----------|---------|--------|-------|-----------|---------|--------|
| 1     | 16640.971 | 165.539 | 18.2   | 1     | 16640.971 | 165.539 | 18.2   |
| 2     | 15636.180 | 155.543 | 21.1   | 2     | 15636.180 | 155.543 | 21.1   |
| 3     | 14983.104 | 149.047 | 16.6   | 3     | 14983.104 | 149.047 | 16.6   |
| 4     | 13656.352 | 135.849 | 26.6   | 4     | 13656.352 | 135.849 | 26.6   |
| 5     | 13622.020 | 135.507 | 172.8  | 5     | 13622.020 | 135.507 | 172.8  |
| 6     | 13425.181 | 133.549 | 15.4   | 6     | 13425.181 | 133.549 | 15.4   |
| 7     | 13422.130 | 133.519 | 16.9   | 7     | 13422.130 | 133.519 | 16.9   |
| 8     | 13364.909 | 132.949 | 26.7   | 8     | 13364.909 | 132.949 | 26.7   |
| 9     | 13297.007 | 132.274 | 20.2   | 9     | 13297.007 | 132.274 | 20.2   |
| 10    | 13033.793 | 129.656 | 86.7   | 10    | 13033.793 | 129.656 | 86.7   |
| 11    | 12834.666 | 127.675 | 170.0  | 11    | 12834.666 | 127.675 | 170.0  |
| 12    | 11871.837 | 118.097 | 32.8   | 12    | 11871.837 | 118.097 | 32.8   |
| 13    | 11772.654 | 117.110 | 33.9   | 13    | 11772.654 | 117.110 | 33.9   |
| 14    | 11522.410 | 114.621 | 22.1   | 14    | 11522.410 | 114.621 | 22.1   |
| 15    | 11015.818 | 109.582 | 14.5   | 15    | 11015.818 | 109.582 | 14.5   |
| 16    | 10925.029 | 108.678 | 29.8   | 16    | 10925.029 | 108.678 | 29.8   |
| 17    | 10479.472 | 104.246 | 29.0   | 17    | 10479.472 | 104.246 | 29.0   |
| 18    | 7772.563  | 77.319  | 71.7   | 18    | 7772.563  | 77.319  | 71.7   |
| 19    | 7740.519  | 77.000  | 75.4   | 19    | 7740.519  | 77.000  | 75.4   |
| 20    | 7708.476  | 76.681  | 74.7   | 20    | 7708.476  | 76.681  | 74.7   |
| 21    | 7571.147  | 75.315  | 34.2   | 21    | 7571.147  | 75.315  | 34.2   |
| 22    | 7372.020  | 73.334  | 29.1   | 22    | 7372.020  | 73.334  | 29.1   |
| 23    | 6972.239  | 69.357  | 41.4   | 23    | 6972.239  | 69.357  | 41.4   |
| 24    | 6850.169  | 68.143  | 31.5   | 24    | 6850.169  | 68.143  | 31.5   |
| 25    | 6590.007  | 65.555  | 40.3   | 25    | 6590.007  | 65.555  | 40.3   |
| 26    | 6355.021  | 63.218  | 34.3   | 26    | 6355.021  | 63.218  | 34.3   |
| 27    | 4922.221  | 48.965  | 38.5   | 27    | 4922.221  | 48.965  | 38.5   |
| 28    | 4153.941  | 41.322  | 39.3   | 28    | 4153.941  | 41.322  | 39.3   |
| 29    | 3649.638  | 36.305  | 36.3   | 29    | 3649.638  | 36.305  | 36.3   |
| 30    | 3583.262  | 35.645  | 30.9   | 30    | 3583.262  | 35.645  | 30.9   |
| 31    | 3470.347  | 34.522  | 29.5   | 31    | 3470.347  | 34.522  | 29.5   |
| 32    | 3460.429  | 34.423  | 31.4   | 32    | 3460.429  | 34.423  | 31.4   |
| 33    | 3194.163  | 31.774  | 46.1   | 33    | 3194.163  | 31.774  | 46.1   |
| 34    | 2694.438  | 26.803  | 136.9  | 34    | 2694.438  | 26.803  | 136.9  |
| 35    | 2527.354  | 25.141  | 44.3   | 35    | 2527.354  | 25.141  | 44.3   |
| 36    | 2272.532  | 22.606  | 48.1   | 36    | 2272.532  | 22.606  | 48.1   |
| 37    | 1915.477  | 19.054  | 29.4   | 37    | 1915.477  | 19.054  | 29.4   |
| 38    | 1411.174  | 14.038  | 40.3   | 38    | 1411.174  | 14.038  | 40.3   |
| 39    | 1167.033  | 11.609  | 38.6   | 39    | 1167.033  | 11.609  | 38.6   |

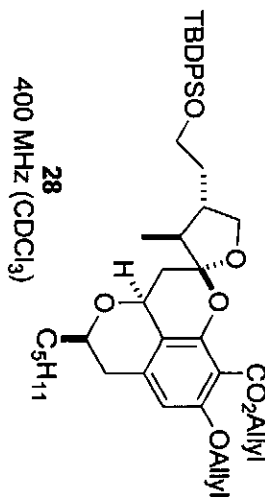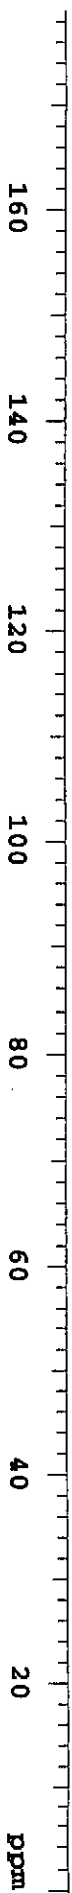

wxc-10-147-2

Pulse Sequence: szpul

Solvent: CDCl<sub>3</sub>

Ambient temperature

File: wxc-10-147-2

INOVA-500 "gamb1a"

Pulse 46.1 degrees

Acq. time 1.638 sec

Width 5000.0 Hz

47 repetitions

OBSERVE F1, 399.7857971 MHz

DATA PROCESSING

F1 size 16384

Total time 3 min, 31 sec

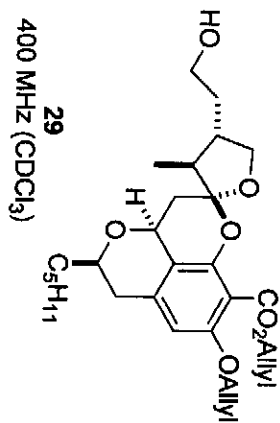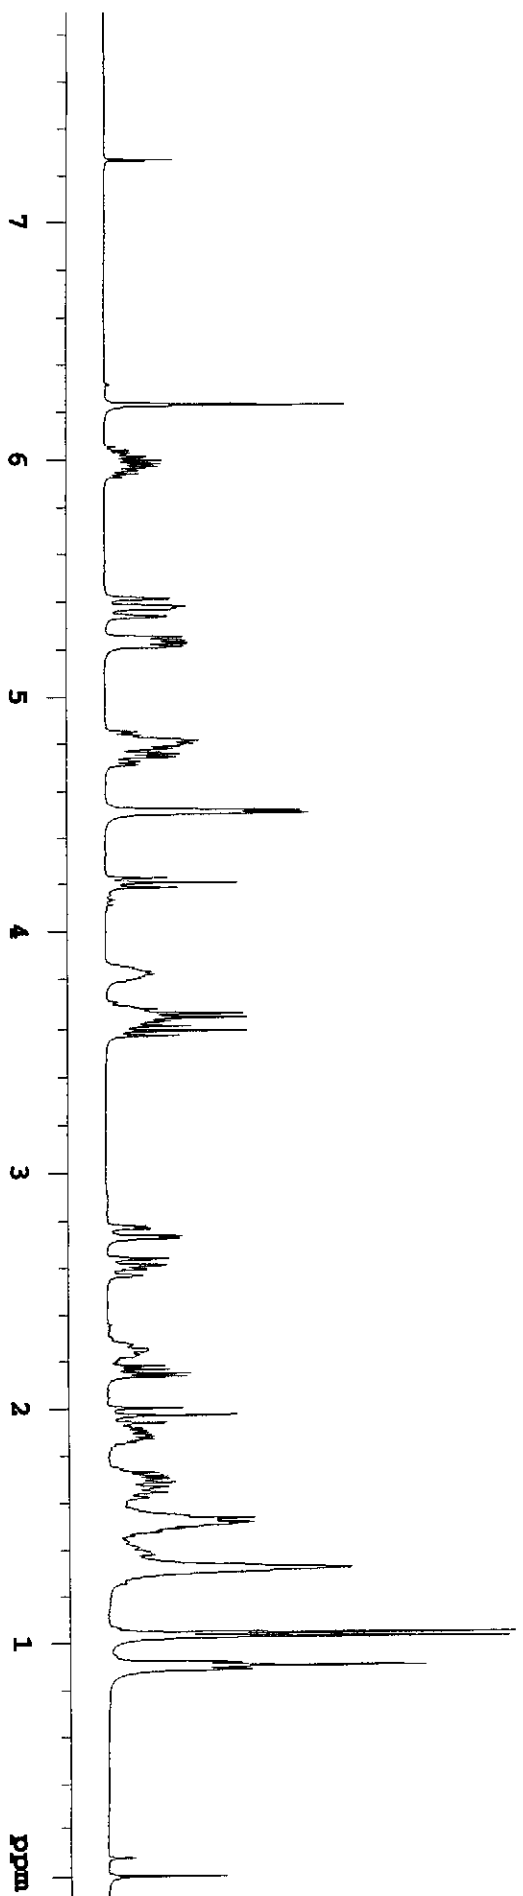

MX-10-147-2C

| INDEX | FREQUENCY | PPM     | HEIGHT |
|-------|-----------|---------|--------|
| 1     | 16650.889 | 165.637 | 18.0   |
| 2     | 15636.180 | 155.543 | 29.7   |
| 3     | 14980.052 | 149.016 | 22.2   |
| 4     | 13662.455 | 135.909 | 29.4   |
| 5     | 13361.857 | 132.919 | 37.3   |
| 6     | 13302.348 | 132.327 | 26.4   |
| 7     | 11876.414 | 118.142 | 44.3   |
| 8     | 11775.706 | 117.141 | 47.6   |
| 9     | 11517.833 | 114.575 | 25.4   |
| 10    | 11007.426 | 109.498 | 16.0   |
| 11    | 10939.524 | 108.823 | 42.9   |
| 12    | 10481.761 | 104.269 | 45.2   |
| 13    | 7772.563  | 77.319  | 119.4  |
| 14    | 7740.519  | 77.000  | 126.8  |
| 15    | 7708.476  | 76.681  | 129.1  |
| 16    | 7571.910  | 75.323  | 49.8   |
| 17    | 7330.058  | 72.917  | 44.2   |
| 18    | 6972.239  | 69.357  | 62.0   |
| 19    | 6844.065  | 68.082  | 48.2   |
| 20    | 6596.873  | 65.623  | 52.3   |
| 21    | 6214.640  | 61.821  | 55.6   |
| 22    | 4919.169  | 48.934  | 51.3   |
| 23    | 4082.988  | 40.616  | 54.5   |
| 24    | 3648.875  | 36.298  | 51.3   |
| 25    | 3585.551  | 35.668  | 50.5   |
| 26    | 3461.192  | 34.431  | 48.5   |
| 27    | 3458.140  | 34.400  | 56.3   |
| 28    | 3194.163  | 31.774  | 59.1   |
| 29    | 2526.591  | 25.134  | 56.2   |
| 30    | 2271.769  | 22.599  | 62.9   |
| 31    | 1410.411  | 14.030  | 58.6   |
| 32    | 1171.611  | 11.655  | 51.3   |

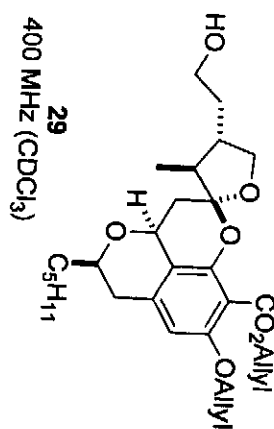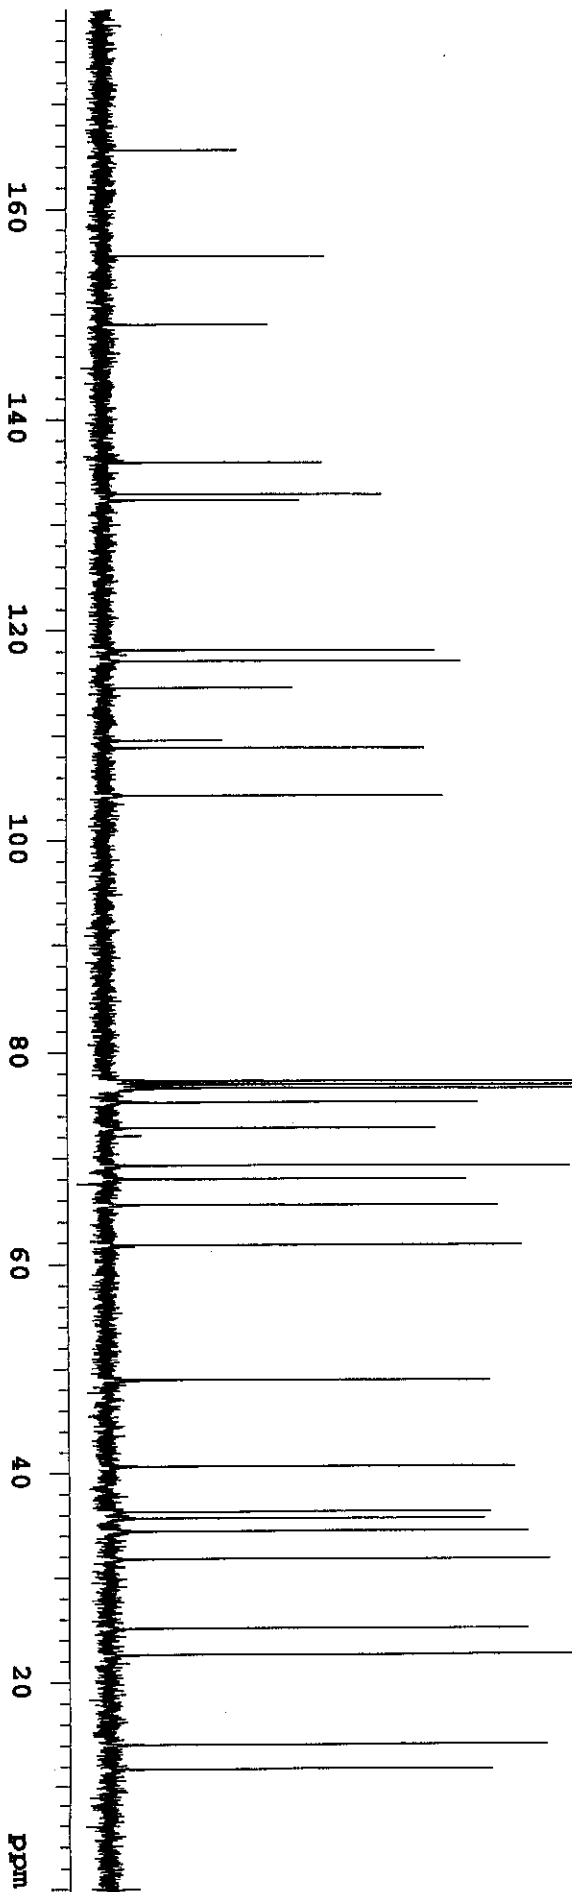

wxc-11-1-4

Pulse Sequence: szpul

Solvent: CDCl3

Ambient temperature

File: wxc-11-1-4

INOVA-500 "gambler"

Pulse 46.1 degrees

Acq. time 1.638 sec

Width 5000.0 Hz

21 repetitions

OBSERVE H1, 399.7857971 MHz

DATA PROCESSING

FT size 16384

Total time 3 min, 31 sec

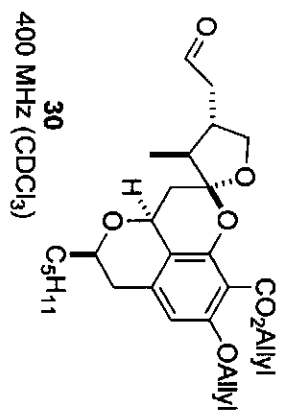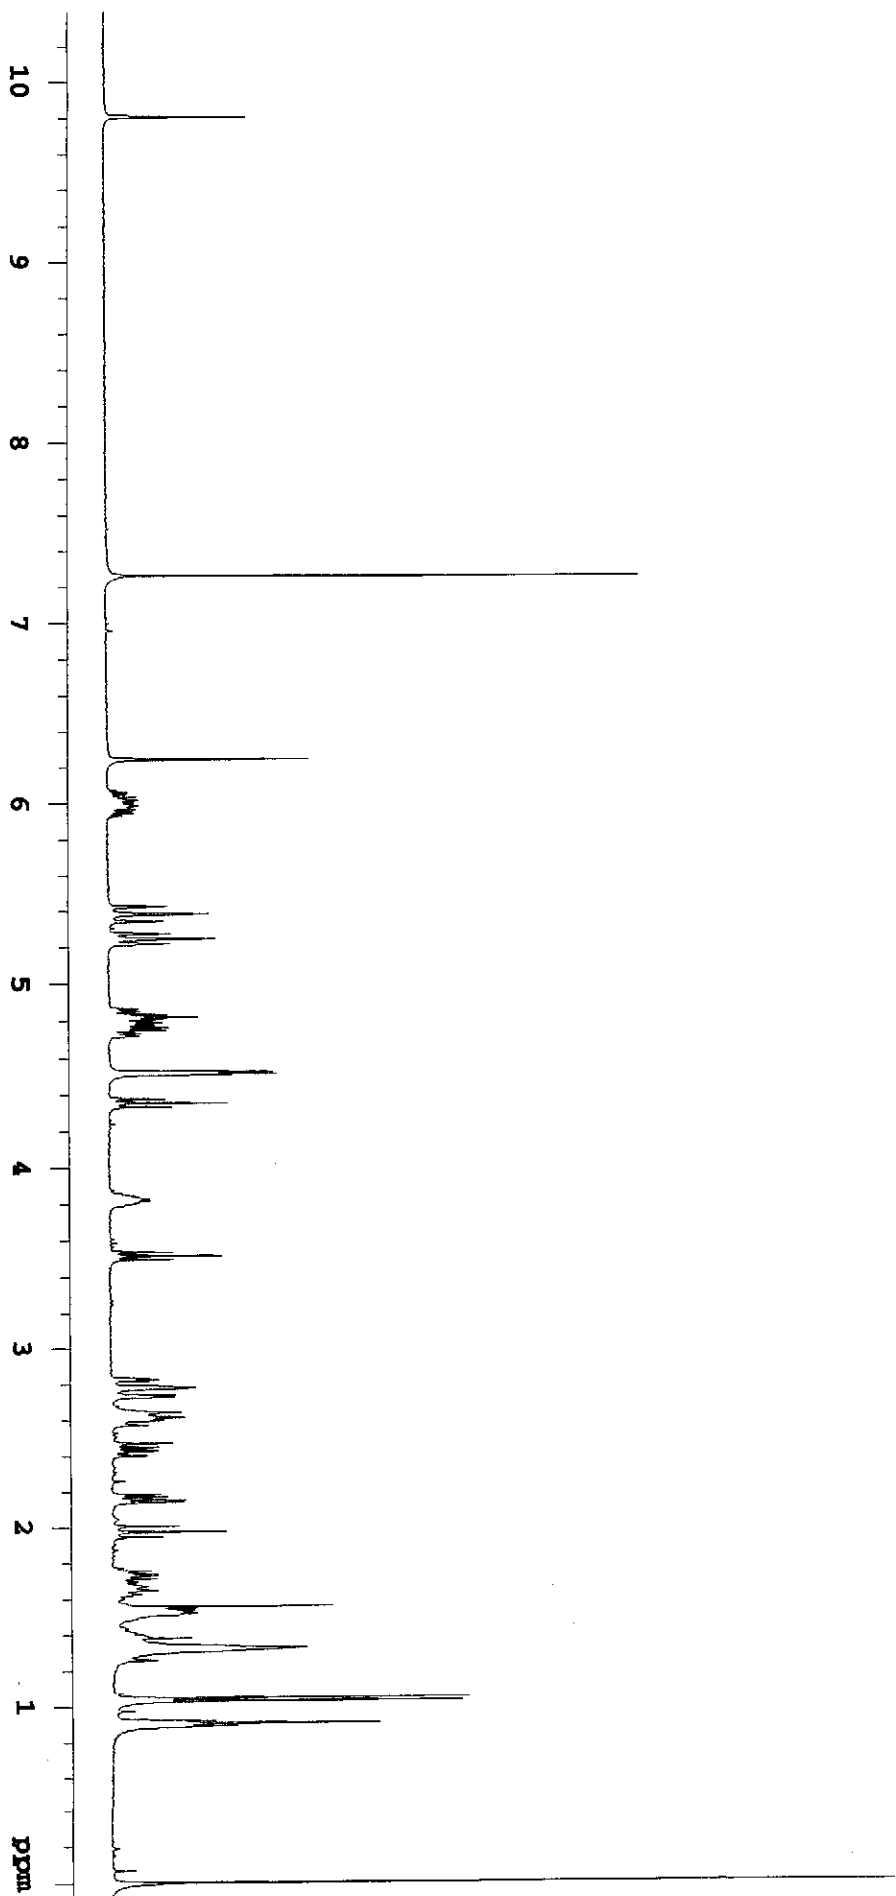

NK-11-1-3C

| INDEX | FREQUENCY | PPM     | BRIGHT |
|-------|-----------|---------|--------|
| 1     | 20159.648 | 200.541 | 48.1   |
| 2     | 16635.630 | 165.485 | 14.4   |
| 3     | 15640.757 | 155.589 | 25.0   |
| 4     | 14963.267 | 148.849 | 22.0   |
| 5     | 13663.981 | 135.925 | 31.7   |
| 6     | 13359.568 | 132.896 | 44.7   |
| 7     | 13284.719 | 132.251 | 29.5   |
| 8     | 11900.065 | 118.378 | 46.0   |
| 9     | 11778.758 | 117.171 | 54.8   |
| 10    | 11509.440 | 114.492 | 29.0   |
| 11    | 11015.818 | 109.582 | 15.8   |
| 12    | 10901.377 | 108.443 | 52.8   |
| 13    | 10500.071 | 104.451 | 57.0   |
| 14    | 7772.563  | 77.319  | 179.2  |
| 15    | 7740.519  | 77.000  | 188.7  |
| 16    | 7708.476  | 76.681  | 192.2  |
| 17    | 7574.198  | 75.345  | 50.9   |
| 18    | 7257.579  | 72.196  | 54.0   |
| 19    | 6974.528  | 69.380  | 66.7   |
| 20    | 6834.147  | 67.984  | 56.1   |
| 21    | 6602.214  | 65.677  | 60.4   |
| 22    | 4877.970  | 48.524  | 62.0   |
| 23    | 4752.085  | 47.272  | 65.3   |
| 24    | 3781.626  | 37.618  | 62.3   |
| 25    | 3648.875  | 36.298  | 61.2   |
| 26    | 3455.851  | 34.378  | 55.6   |
| 27    | 3448.985  | 34.309  | 53.3   |
| 28    | 3194.163  | 31.774  | 71.9   |
| 29    | 2525.828  | 25.126  | 70.8   |
| 30    | 2372.532  | 22.606  | 67.3   |
| 31    | 1411.174  | 14.038  | 64.3   |
| 32    | 1159.404  | 11.533  | 58.8   |

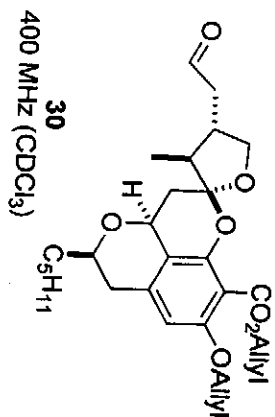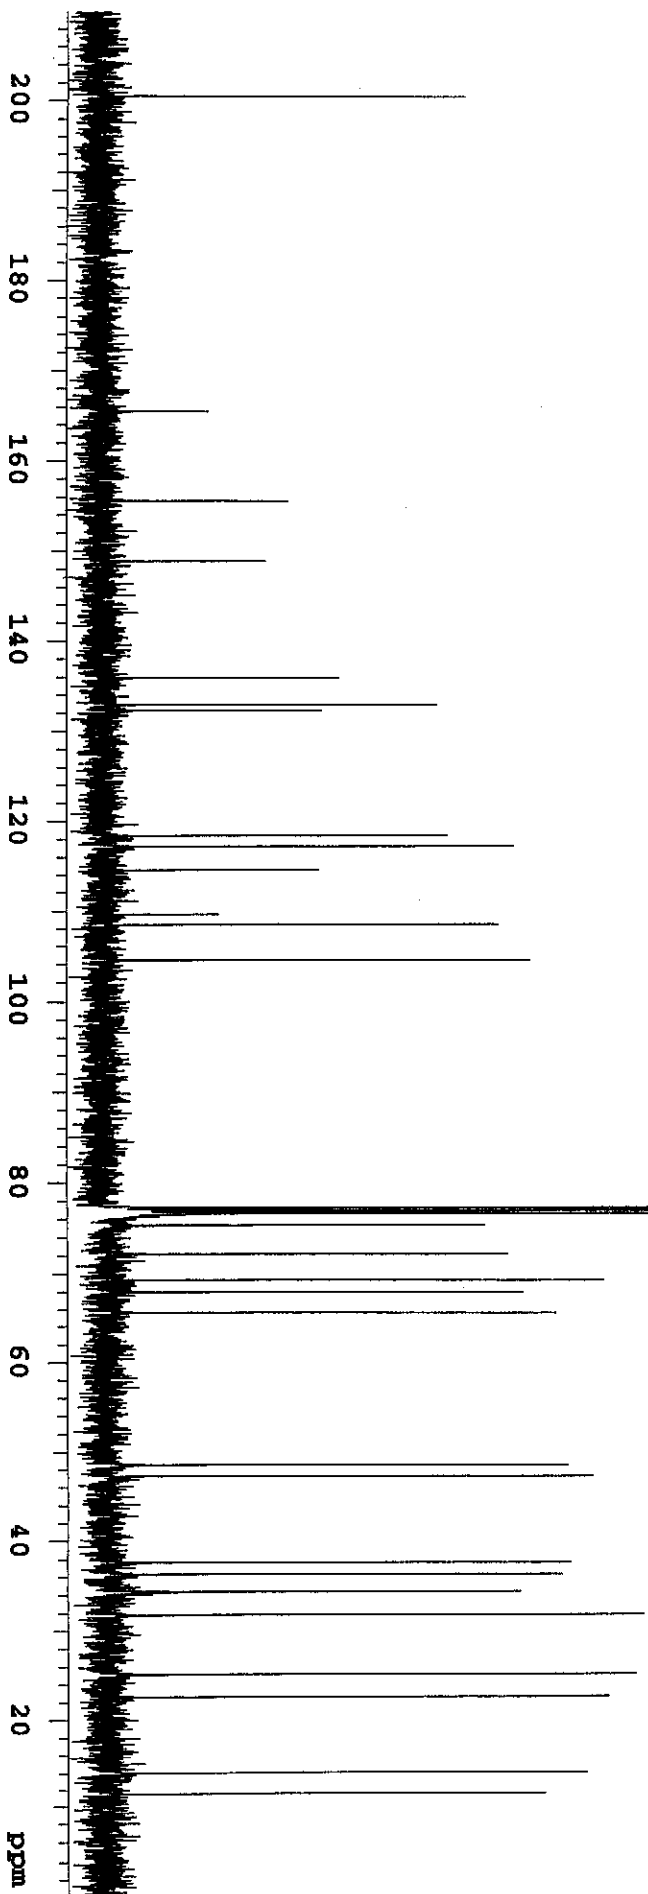

wkx-11-13-2

Pulse Sequence: s2pul

Solvent: CDCl3

Ambient temperature

File: wkx-11-13-2

INOVA-500 "gamble"

Pulse 46.1 degrees

Acq. time 1.638 sec

Width 5000.0 Hz

69 repetitions

OBSERVE H1, 399.7857971 MHz

DATA PROCESSING

F1 size 16384

Total time 3 min, 31 sec

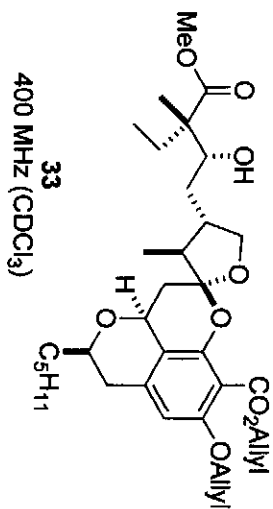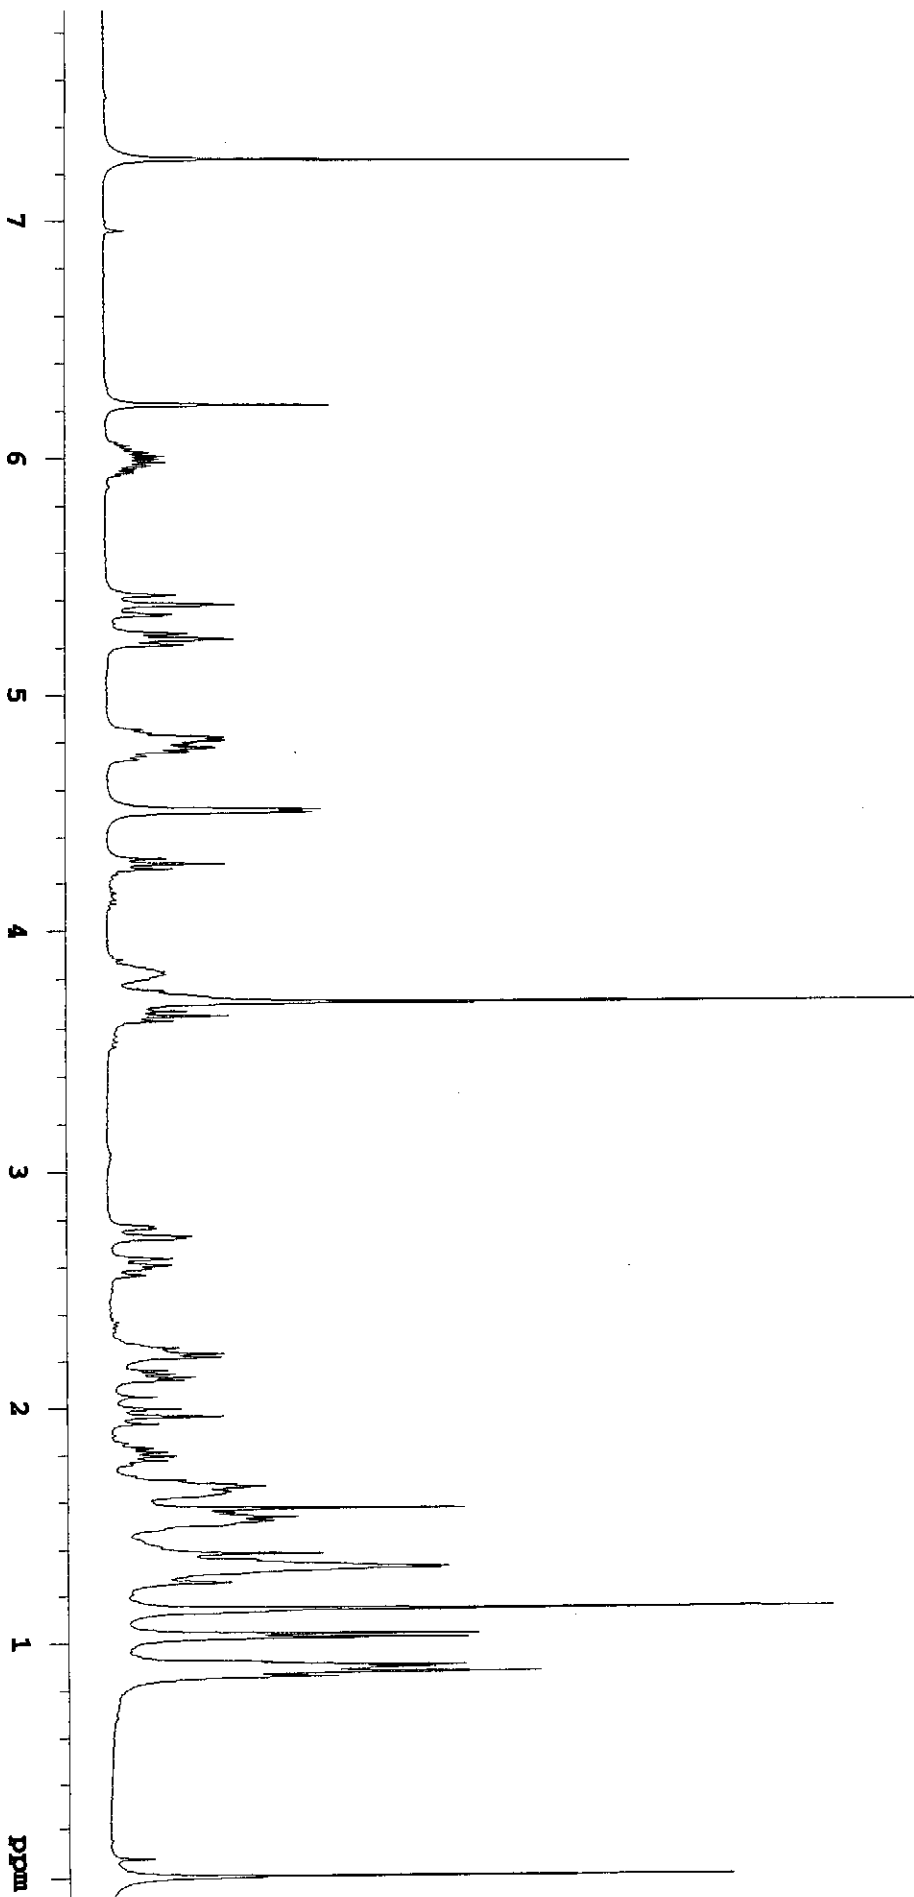



WXX-11-19-2c

| INDEX | FREQUENCY | PPM     | HEIGHT |
|-------|-----------|---------|--------|
| 1     | 17787.213 | 176.941 | 18.6   |
| 2     | 16653.449 | 165.663 | 18.0   |
| 3     | 15636.421 | 155.546 | 18.1   |
| 4     | 14987.140 | 149.087 | 17.8   |
| 5     | 13660.347 | 135.888 | 31.9   |
| 6     | 13365.844 | 132.959 | 37.6   |
| 7     | 13309.384 | 132.397 | 26.5   |
| 8     | 11878.829 | 118.166 | 37.9   |
| 9     | 11775.066 | 117.134 | 43.1   |
| 10    | 11524.814 | 114.645 | 25.6   |
| 11    | 11009.814 | 109.522 | 16.9   |
| 12    | 10909.104 | 108.530 | 33.7   |
| 13    | 10478.029 | 104.232 | 40.1   |
| 14    | 7772.563  | 77.319  | 133.2  |
| 15    | 7740.519  | 77.000  | 138.5  |
| 16    | 7708.475  | 76.681  | 133.9  |
| 17    | 7661.934  | 76.218  | 48.1   |
| 18    | 7570.378  | 75.308  | 45.9   |
| 19    | 7425.416  | 73.865  | 38.9   |
| 20    | 6974.504  | 69.380  | 52.0   |
| 21    | 6847.090  | 68.112  | 45.3   |
| 22    | 6598.364  | 65.638  | 49.4   |
| 23    | 5205.957  | 51.787  | 44.7   |
| 24    | 5149.499  | 51.225  | 41.7   |
| 25    | 4929.765  | 49.040  | 45.4   |
| 26    | 4269.802  | 42.475  | 51.8   |
| 27    | 3651.039  | 36.319  | 50.9   |
| 28    | 3549.565  | 35.310  | 41.3   |
| 29    | 3473.269  | 34.551  | 35.7   |
| 30    | 3459.535  | 34.414  | 43.2   |
| 31    | 3195.550  | 31.788  | 62.4   |
| 32    | 2852.980  | 28.380  | 42.1   |
| 33    | 2527.195  | 25.140  | 61.0   |
| 34    | 2272.365  | 22.605  | 69.4   |
| 35    | 1683.358  | 16.745  | 51.7   |
| 36    | 1410.980  | 14.036  | 61.1   |
| 37    | 1192.773  | 11.865  | 44.6   |
| 38    | 903.610   | 8.989   | 44.9   |

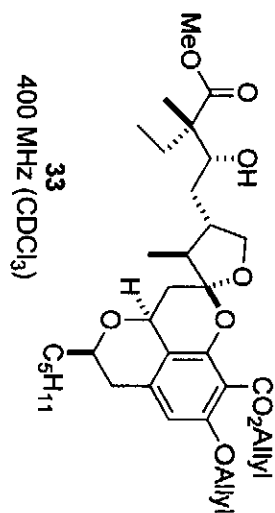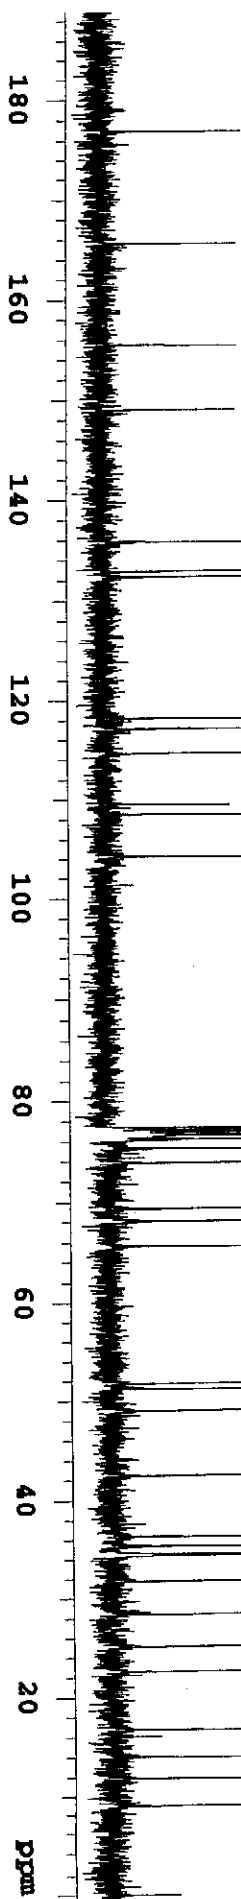

wack-11-13-3

Pulse Sequence: s2pul

Solvent: CDCl3

Ambient temperature

File: wack-11-13-3

INOVA-500 "gamble"

Pulse 46.1 degrees

Acq. time 1.638 sec

Width 5000.0 Hz

42 repetitions

OBSERVE H1, 399.7857971 MHz

DATA PROCESSING

FT size 16384

Total time 3 min, 31 sec

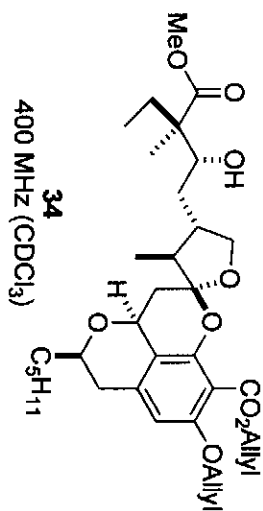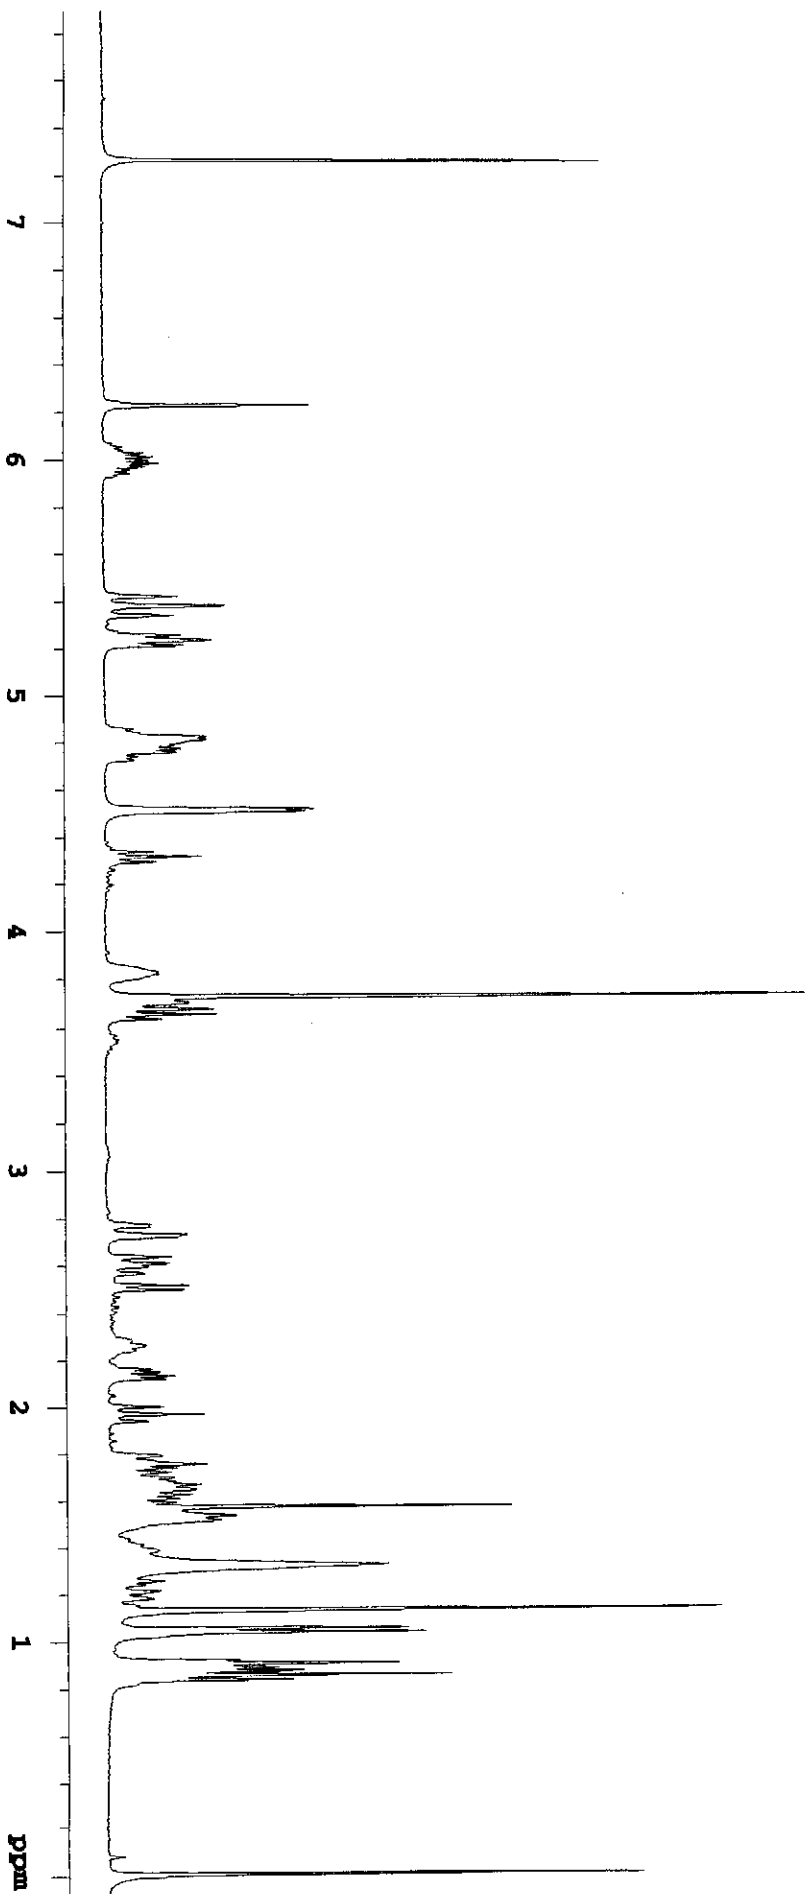

MXX-11-19-3C

| INDEX | FREQUENCY | PPM     | HEIGHT |
|-------|-----------|---------|--------|
| 1     | 17851.301 | 177.579 | 16.6   |
| 2     | 16650.398 | 165.632 | 16.4   |
| 3     | 15637.946 | 155.561 | 20.2   |
| 4     | 14988.665 | 149.102 | 16.4   |
| 5     | 13658.821 | 135.873 | 20.4   |
| 6     | 13365.844 | 132.959 | 34.3   |
| 7     | 13308.621 | 132.390 | 23.3   |
| 8     | 11873.488 | 118.113 | 35.3   |
| 9     | 11773.540 | 117.119 | 44.2   |
| 10    | 11524.052 | 114.537 | 18.3   |
| 11    | 11009.052 | 109.514 | 13.0   |
| 12    | 10899.948 | 108.429 | 30.1   |
| 13    | 10477.267 | 104.224 | 35.6   |
| 14    | 7772.563  | 77.319  | 105.9  |
| 15    | 7740.519  | 77.000  | 110.8  |
| 16    | 7708.475  | 76.681  | 111.3  |
| 17    | 7588.689  | 75.490  | 42.8   |
| 18    | 7569.616  | 75.300  | 43.8   |
| 19    | 7439.149  | 74.002  | 34.0   |
| 20    | 6973.742  | 69.372  | 54.6   |
| 21    | 6846.337  | 68.105  | 40.6   |
| 22    | 6596.838  | 65.623  | 42.8   |
| 23    | 5212.824  | 51.855  | 40.3   |
| 24    | 5171.624  | 51.446  | 29.8   |
| 25    | 4932.816  | 49.070  | 40.6   |
| 26    | 4279.720  | 42.573  | 42.6   |
| 27    | 3650.276  | 36.312  | 44.1   |
| 28    | 3475.558  | 34.574  | 36.1   |
| 29    | 3467.165  | 34.490  | 39.8   |
| 30    | 3458.772  | 34.407  | 41.0   |
| 31    | 3194.787  | 31.781  | 60.6   |
| 32    | 2975.817  | 29.602  | 38.1   |
| 33    | 2526.432  | 25.132  | 54.6   |
| 34    | 2271.602  | 22.597  | 66.5   |
| 35    | 1703.195  | 16.943  | 45.1   |
| 36    | 1410.217  | 14.028  | 59.9   |
| 37    | 1193.536  | 11.873  | 44.1   |
| 38    | 884.536   | 8.799   | 40.3   |

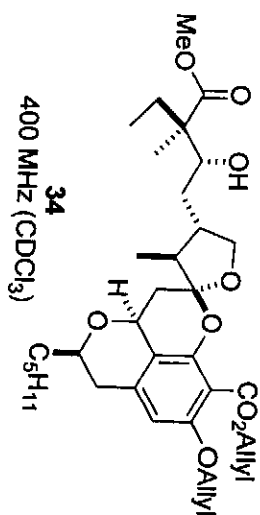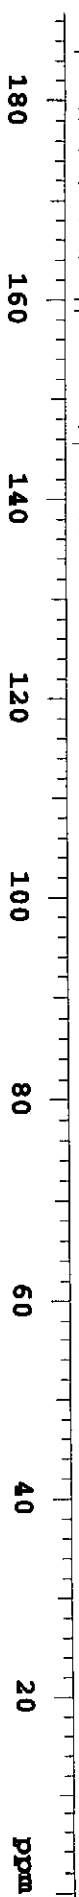

wxc-11-21-1

Pulse Sequence: s2pul

Solvent: CDCl3

Ambient temperature

File: wxc-11-21-1

INOVA-500 "gambler"

Pulse 46.1 degrees

Acq. time 1.638 sec

Width 5000.0 Hz

39 repetitions

OBSERVE H1, 399.7857971 MHz

DATA PROCESSING

F1 size 16384

Total time 3 min, 31 sec

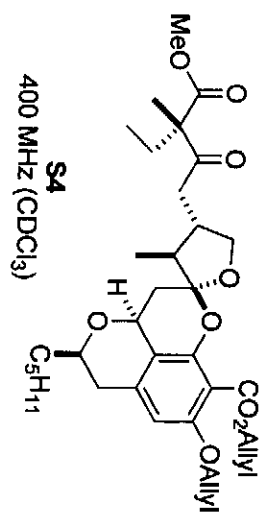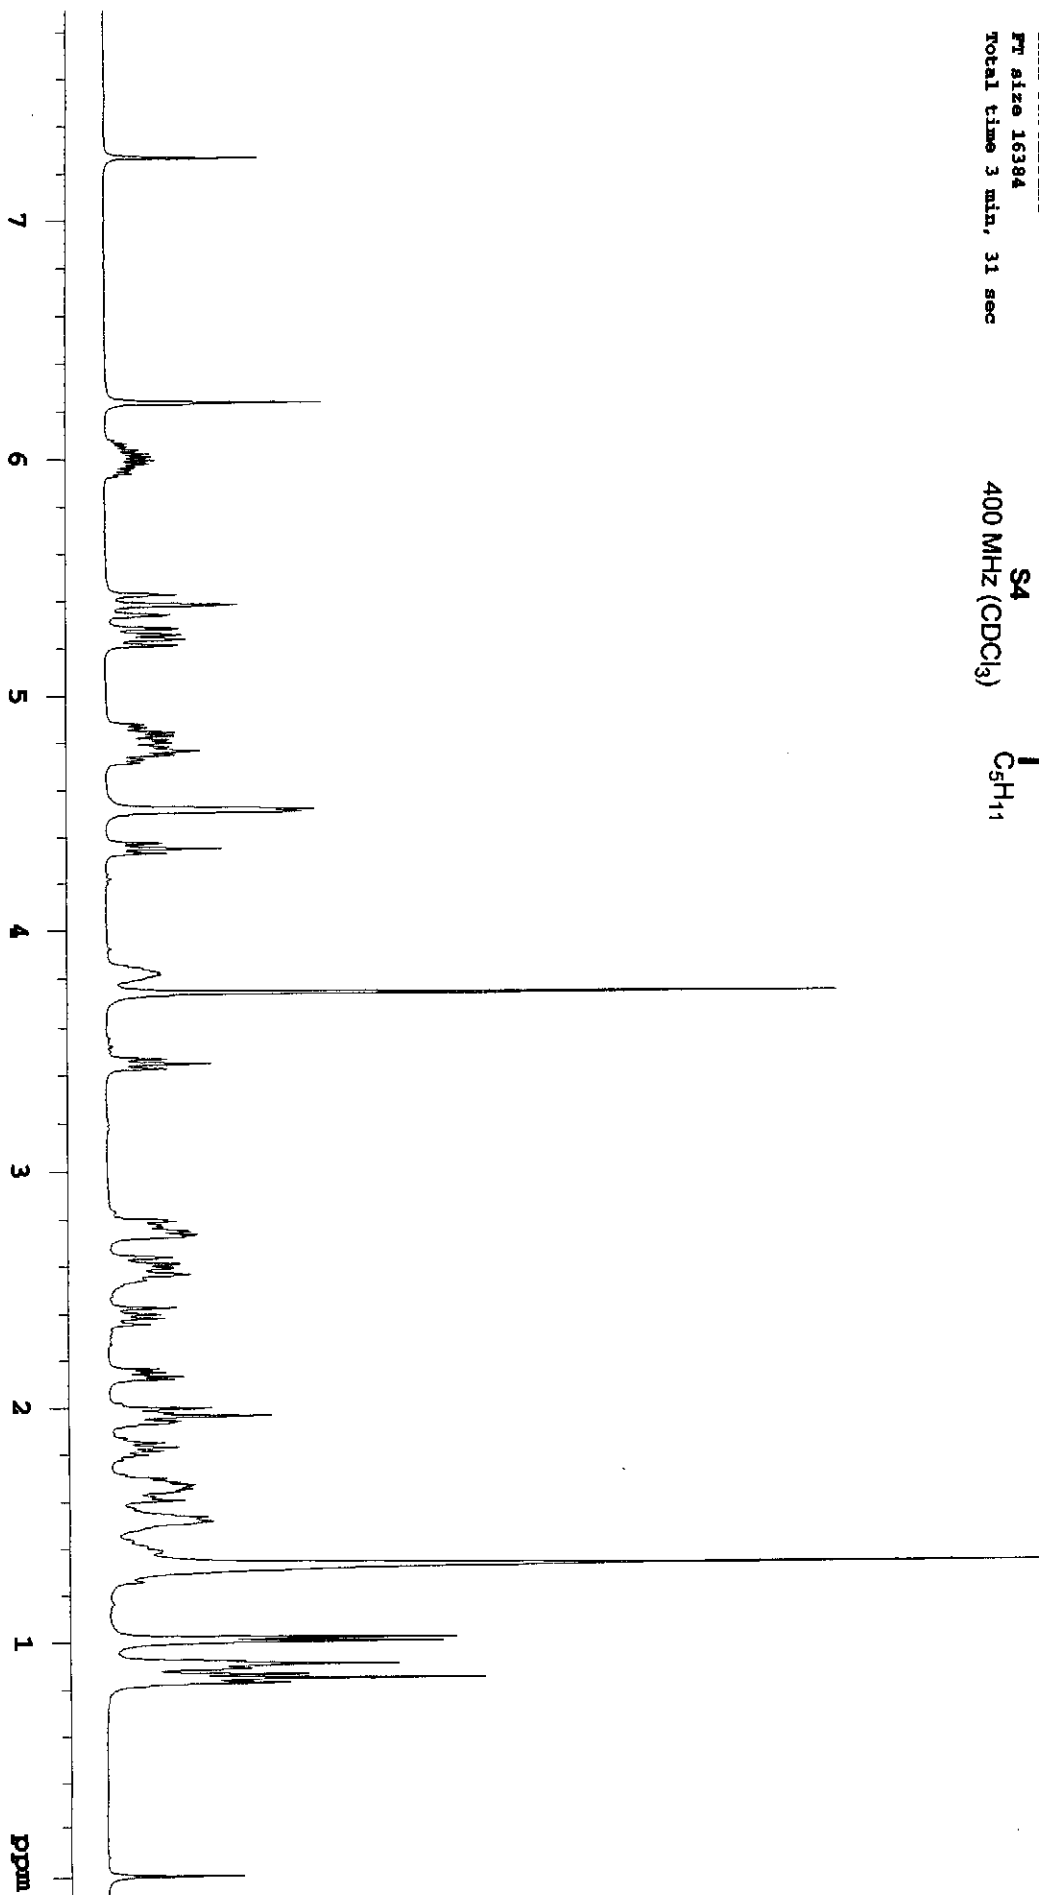

WXX-11-21-1C

| INDEX | FREQUENCY | PPM     | HEIGHT |
|-------|-----------|---------|--------|
| 1     | 20763.896 | 206.552 | 29.9   |
| 2     | 17436.717 | 173.454 | 19.7   |
| 3     | 16637.919 | 165.508 | 20.1   |
| 4     | 15637.706 | 155.558 | 31.4   |
| 5     | 14970.896 | 148.925 | 23.5   |
| 6     | 13654.826 | 135.833 | 35.4   |
| 7     | 13363.383 | 132.934 | 46.3   |
| 8     | 13290.141 | 132.206 | 31.3   |
| 9     | 11913.035 | 118.507 | 50.6   |
| 10    | 11776.469 | 117.148 | 54.9   |
| 11    | 11511.729 | 114.515 | 29.3   |
| 12    | 11023.448 | 109.657 | 17.2   |
| 13    | 10899.852 | 108.428 | 52.5   |
| 14    | 10494.731 | 104.398 | 50.9   |
| 15    | 7772.563  | 77.319  | 225.1  |
| 16    | 7740.519  | 77.000  | 233.0  |
| 17    | 7708.476  | 76.681  | 229.0  |
| 18    | 7572.673  | 75.330  | 56.2   |
| 19    | 7316.325  | 72.780  | 49.3   |
| 20    | 6975.291  | 69.388  | 74.0   |
| 21    | 6837.962  | 68.022  | 56.0   |
| 22    | 6602.977  | 65.684  | 65.7   |
| 23    | 6004.832  | 59.734  | 36.9   |
| 24    | 5265.544  | 52.380  | 57.1   |
| 25    | 4868.052  | 48.426  | 60.6   |
| 26    | 4225.657  | 42.035  | 60.1   |
| 27    | 3907.511  | 38.871  | 69.4   |
| 28    | 3648.875  | 36.298  | 63.5   |
| 29    | 3459.666  | 34.416  | 59.1   |
| 30    | 3455.614  | 34.385  | 64.8   |
| 31    | 3194.163  | 31.774  | 67.9   |
| 32    | 2800.486  | 27.858  | 55.8   |
| 33    | 2525.828  | 25.126  | 72.2   |
| 34    | 2272.532  | 22.606  | 76.3   |
| 35    | 1849.101  | 18.394  | 64.4   |
| 36    | 1410.411  | 14.030  | 62.2   |
| 37    | 1167.033  | 11.609  | 60.4   |
| 38    | 867.198   | 8.627   | 49.7   |

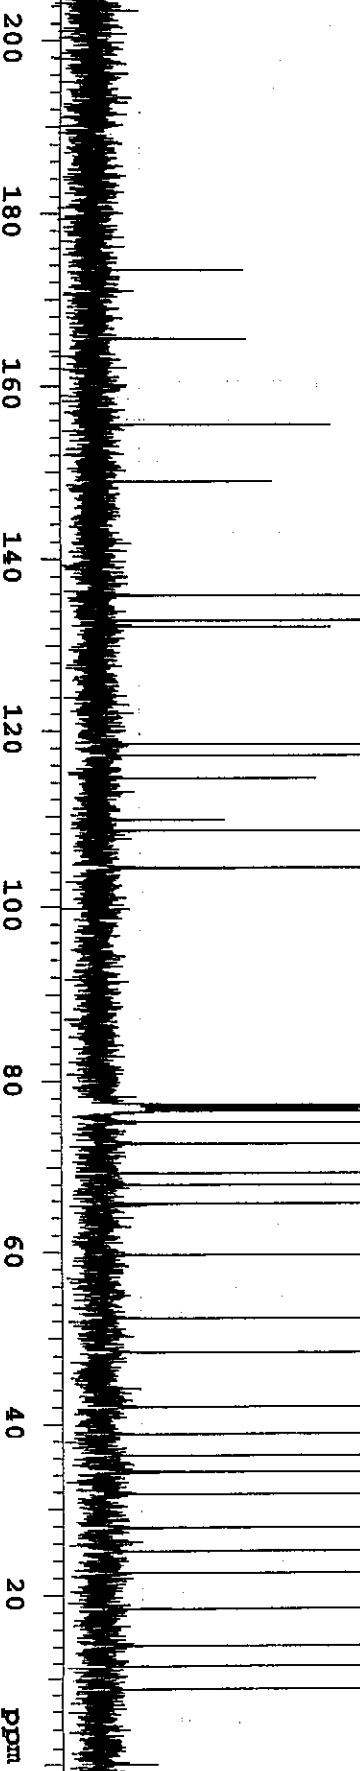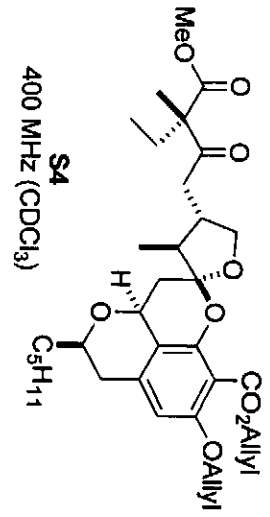

wkx-11-21-2

Pulse Sequence: zgpg1

Solvent: CDCl3

Ambient temperature

File: wkx-11-21-2

INOVA-500 "gambler"

Pulse 46.1 degrees

Acq. time 1.638 sec

Width 5000.0 Hz

29 repetitions

OBSERVE H1, 399.7857971 MHz

DATA PROCESSING

FT size 16384

Total time 3 min, 31 sec

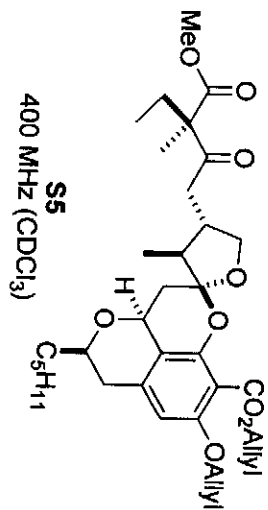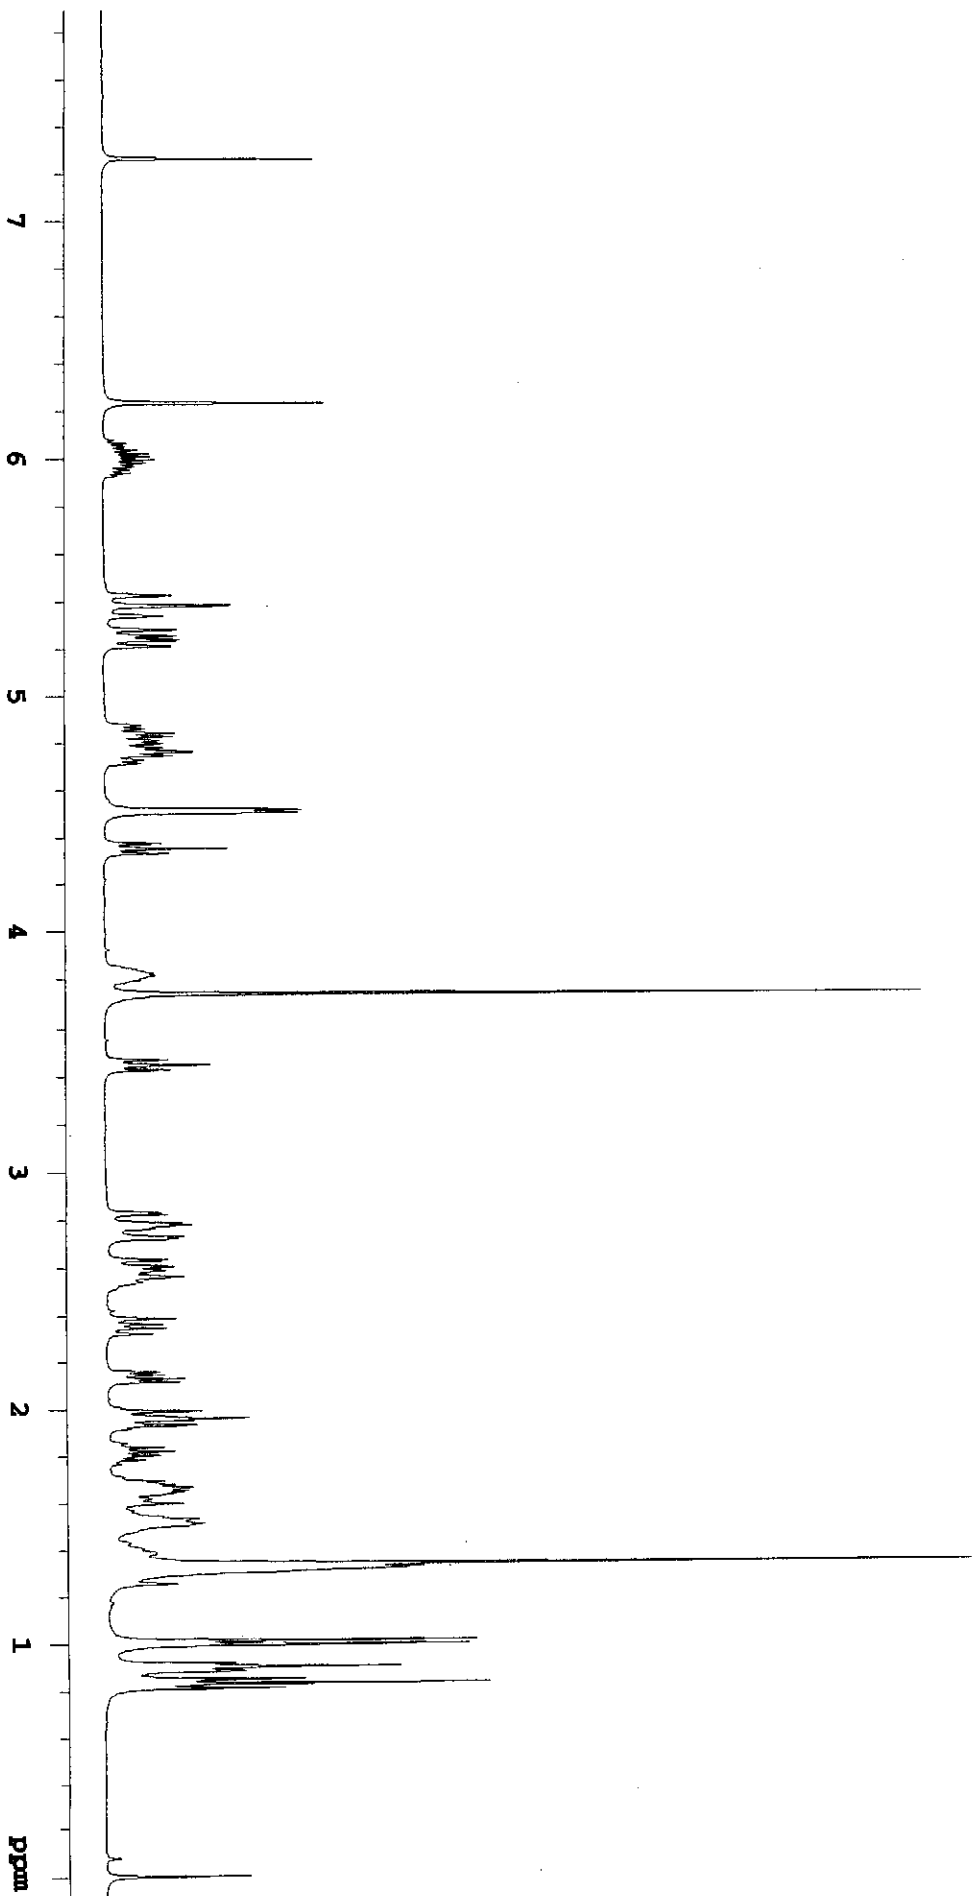

WU-11-21-2C

| INDEX | FREQUENCY | PPM     | HEIGHT |
|-------|-----------|---------|--------|
| 1     | 20758.555 | 206.499 | 23.6   |
| 2     | 17436.717 | 173.454 | 28.7   |
| 3     | 16638.682 | 165.516 | 21.1   |
| 4     | 15639.231 | 155.574 | 32.0   |
| 5     | 14971.659 | 148.933 | 23.6   |
| 6     | 13656.352 | 135.849 | 40.5   |
| 7     | 13364.909 | 132.949 | 39.3   |
| 8     | 13291.667 | 132.221 | 27.8   |
| 9     | 11912.272 | 118.499 | 49.6   |
| 10    | 11777.232 | 117.156 | 59.8   |
| 11    | 11513.255 | 114.530 | 32.4   |
| 12    | 11024.211 | 109.665 | 15.6   |
| 13    | 10899.851 | 108.428 | 49.8   |
| 14    | 10495.494 | 104.406 | 52.9   |
| 15    | 7772.563  | 77.319  | 206.3  |
| 16    | 7740.519  | 77.000  | 217.3  |
| 17    | 7708.476  | 76.681  | 209.6  |
| 18    | 7573.435  | 75.338  | 57.9   |
| 19    | 7314.799  | 72.765  | 50.3   |
| 20    | 6976.054  | 69.395  | 71.8   |
| 21    | 6839.488  | 68.037  | 52.2   |
| 22    | 6603.739  | 65.692  | 62.8   |
| 23    | 6004.832  | 59.734  | 47.7   |
| 24    | 5267.069  | 52.395  | 48.9   |
| 25    | 4871.867  | 48.464  | 60.4   |
| 26    | 4224.894  | 42.028  | 60.5   |
| 27    | 3907.511  | 38.871  | 67.1   |
| 28    | 3649.638  | 36.305  | 63.8   |
| 29    | 3457.377  | 34.393  | 69.1   |
| 30    | 3194.926  | 31.782  | 74.6   |
| 31    | 2793.620  | 27.790  | 52.8   |
| 32    | 2526.591  | 25.134  | 74.8   |
| 33    | 2273.295  | 22.614  | 69.4   |
| 34    | 1840.708  | 18.311  | 59.0   |
| 35    | 1411.173  | 14.038  | 62.4   |
| 36    | 1167.796  | 11.617  | 58.9   |
| 37    | 863.383   | 8.589   | 50.3   |

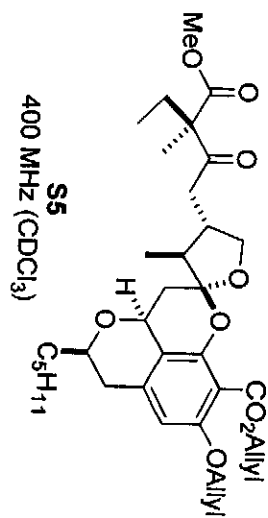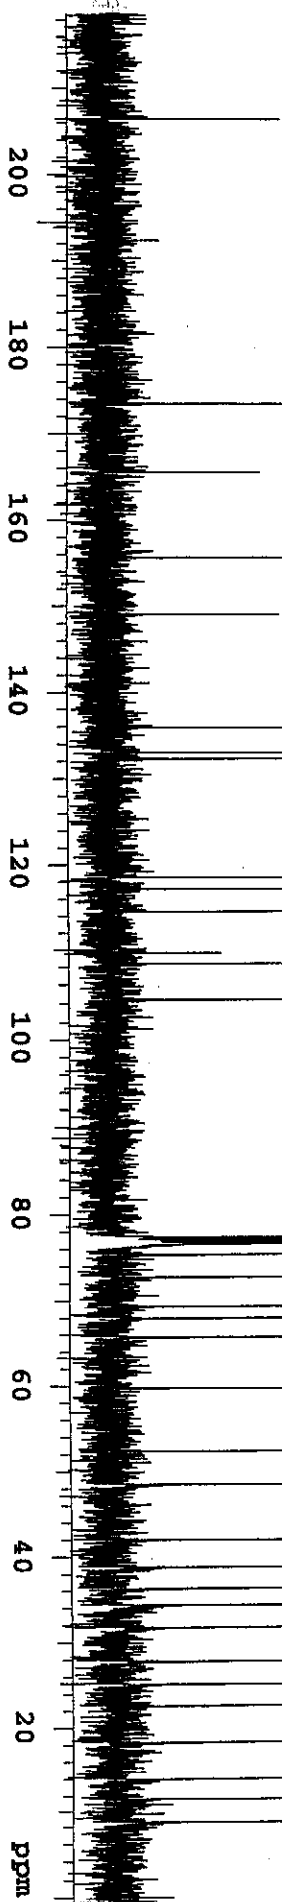

WKK-11-23-5

Pulse Sequence: sZpu1

Solvent: CDCl3

Ambient temperature

File: WKK-11-23-5

INOVA-500 "gambler"

Pulse 46.1 degrees

Acq. time 1.638 sec

Width 8000.0 Hz

31 repetitions

OBSERVE H1, 399.7857971 MHz

DATA PROCESSING

F1 size 32768

Total time 3 min, 31 sec

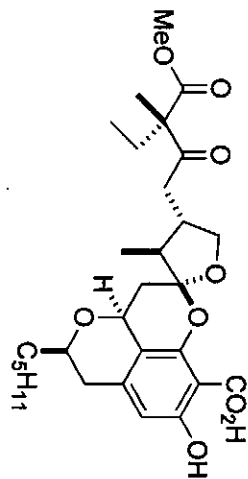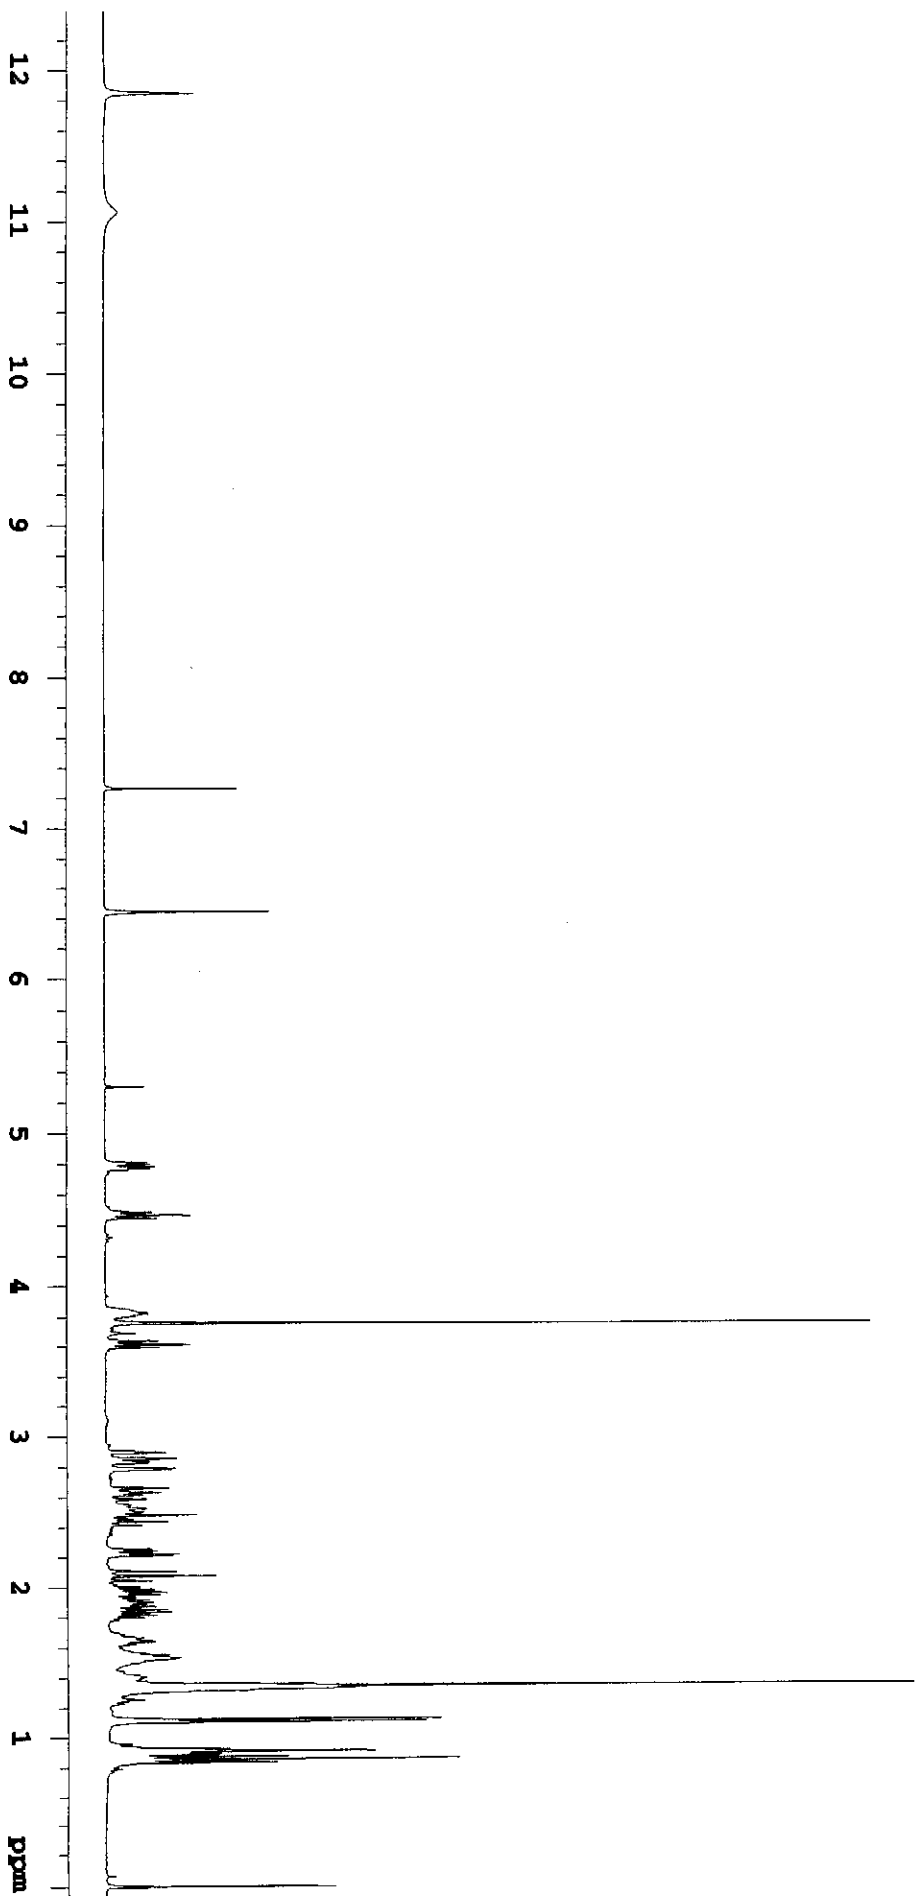



WXY-11-23-5c in CDCl<sub>3</sub>

| INDEX | FREQUENCY | PPM     | HEIGHT |
|-------|-----------|---------|--------|
| 1     | 20712.779 | 206.044 | 22.0   |
| 2     | 17426.798 | 173.356 | 19.0   |
| 3     | 17139.170 | 170.495 | 27.5   |
| 4     | 16338.847 | 162.533 | 32.9   |
| 5     | 15055.583 | 149.768 | 20.4   |
| 6     | 14296.458 | 142.216 | 27.6   |
| 7     | 11275.981 | 112.170 | 59.2   |
| 8     | 11107.371 | 110.492 | 47.1   |
| 9     | 9914.897  | 98.630  | 23.0   |
| 10    | 7772.563  | 77.319  | 259.7  |
| 11    | 7740.519  | 77.000  | 265.4  |
| 12    | 7708.476  | 76.681  | 257.4  |
| 13    | 7560.465  | 75.209  | 48.6   |
| 14    | 7391.093  | 73.524  | 41.0   |
| 15    | 6759.379  | 67.340  | 45.8   |
| 16    | 6005.595  | 59.742  | 30.7   |
| 17    | 5276.225  | 52.486  | 45.7   |
| 18    | 4845.164  | 48.198  | 53.6   |
| 19    | 4178.355  | 41.565  | 50.6   |
| 20    | 3955.577  | 39.349  | 48.9   |
| 21    | 3643.534  | 36.245  | 56.7   |
| 22    | 3448.222  | 34.302  | 78.1   |
| 23    | 3191.874  | 31.752  | 69.2   |
| 24    | 2805.827  | 27.911  | 49.4   |
| 25    | 2515.147  | 25.020  | 53.4   |
| 26    | 2270.243  | 22.584  | 60.4   |
| 27    | 1850.627  | 18.409  | 50.3   |
| 28    | 1410.411  | 14.030  | 57.4   |
| 29    | 1205.943  | 11.996  | 50.9   |
| 30    | 871.775   | 8.672   | 42.4   |

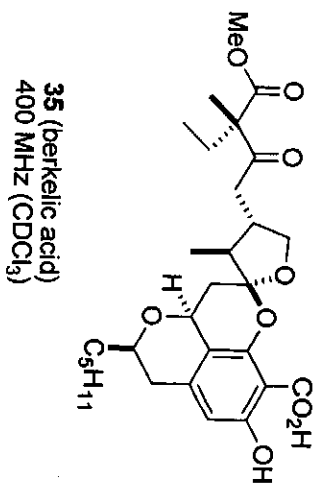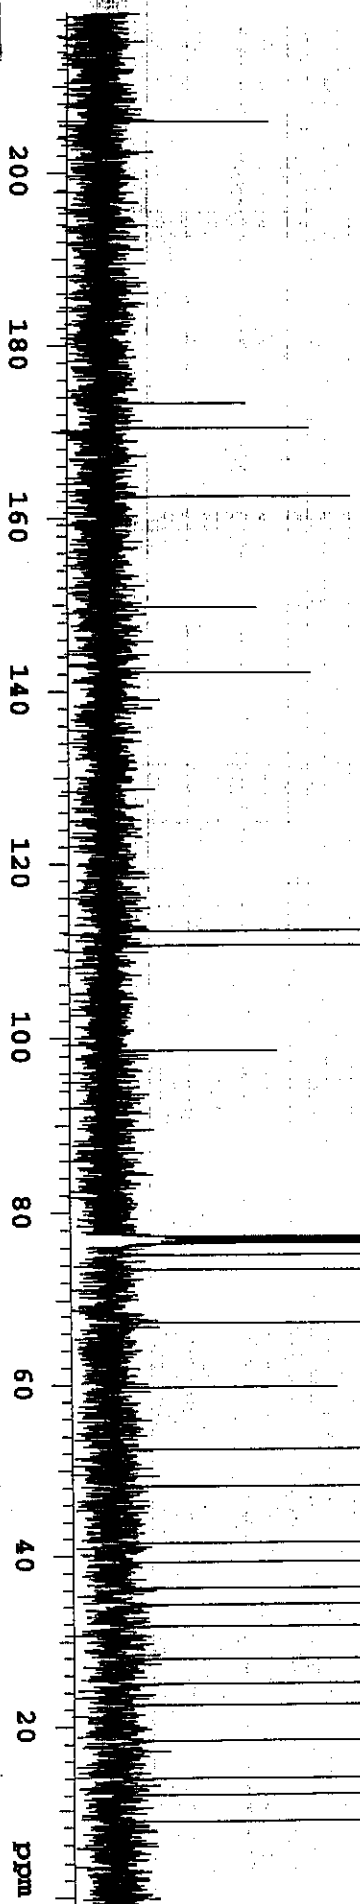

wkr-11-23-5-CD3OD--500 M

Pulse Sequence: szpul

Solvent: CD3OD

Temp. 25.0 C / 298.1 K

File: wkr-11-23-5-CD3OD

INOVA-500 "echo"

Pulse 47.4 degrees

Acq. time 1.892 sec

Width 8000.0 Hz

66 repetitions

OBSERVE H1, 499.8040886 MHz

DATA PROCESSING

FT size 32768

Total time 4 min, 3 sec

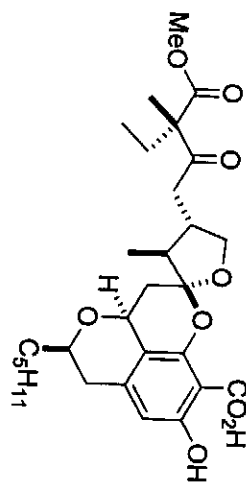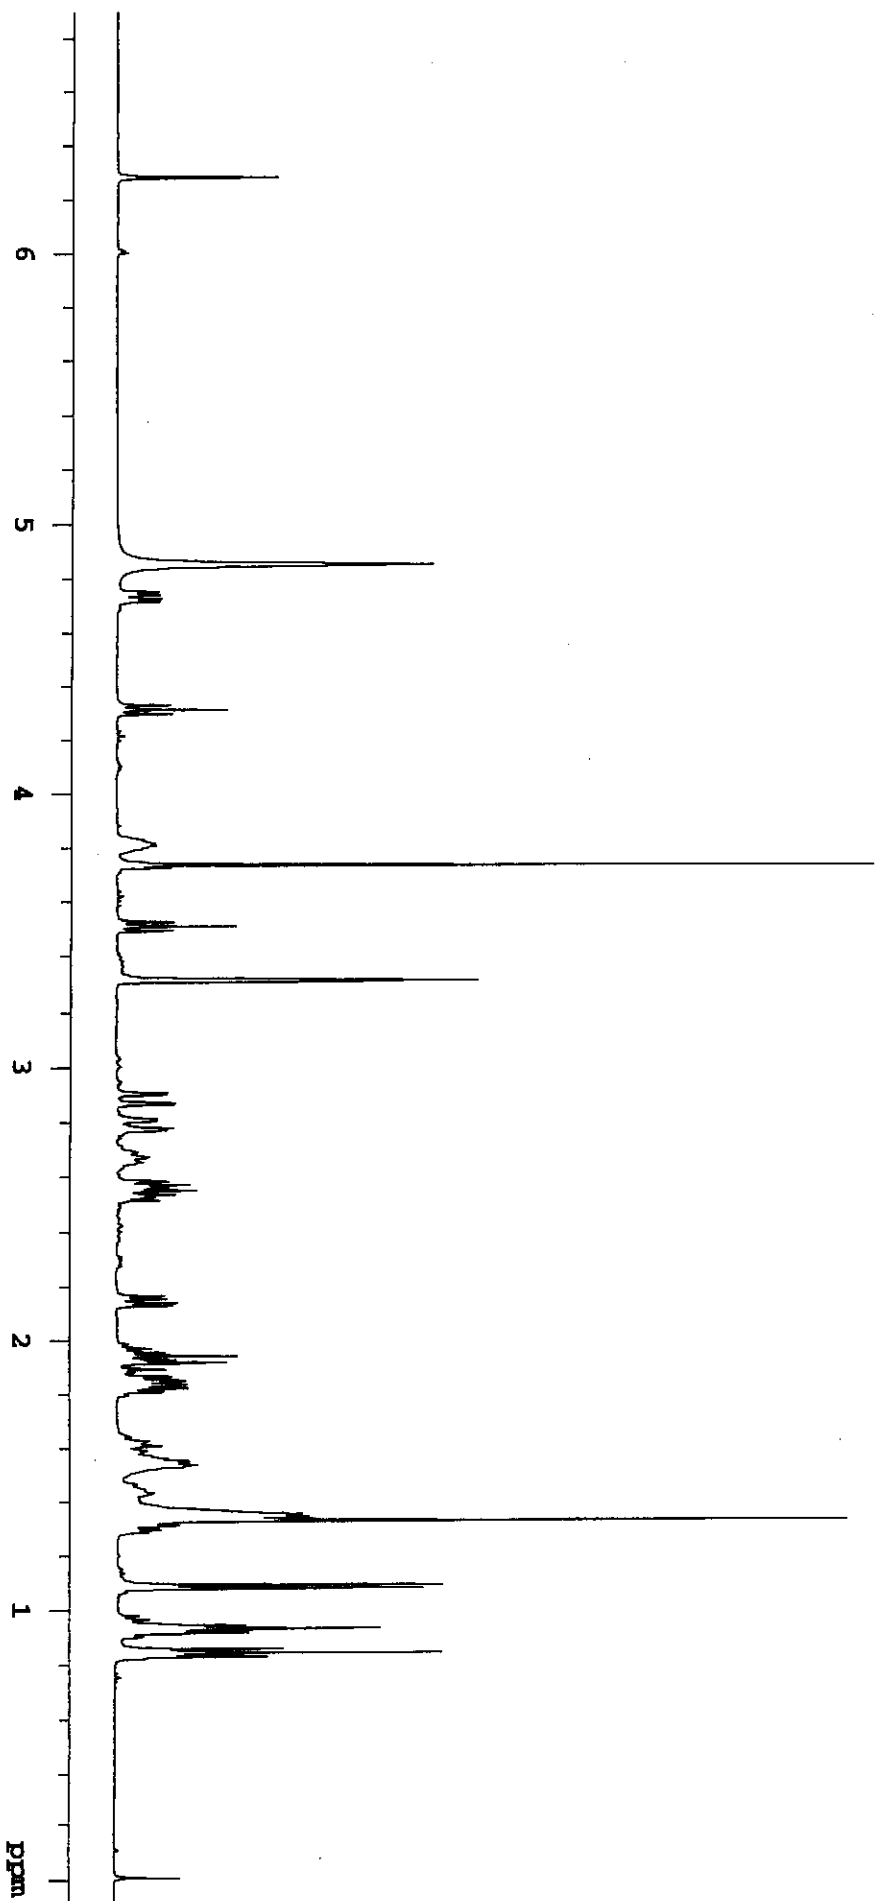

WXX-11-23-5-CD<sub>3</sub>OD-C

| INDEX | FREQUENCY | PPM     | HEIGHT |
|-------|-----------|---------|--------|
| 1     | 20989.487 | 208.796 | 36.3   |
| 2     | 17575.333 | 174.833 | 31.6   |
| 3     | 17457.078 | 173.657 | 17.4   |
| 4     | 16424.058 | 163.380 | 37.6   |
| 5     | 15387.986 | 153.074 | 27.7   |
| 6     | 14303.086 | 142.282 | 40.9   |
| 7     | 11435.960 | 113.761 | 33.6   |
| 8     | 11131.547 | 110.732 | 52.2   |
| 9     | 10993.455 | 109.359 | 43.8   |
| 10    | 10167.954 | 101.147 | 14.3   |
| 11    | 7695.267  | 76.550  | 43.8   |
| 12    | 7455.705  | 74.167  | 40.4   |
| 13    | 6985.734  | 69.491  | 43.8   |
| 14    | 6135.056  | 61.029  | 57.1   |
| 15    | 5313.371  | 52.855  | 55.0   |
| 16    | 4989.884  | 49.638  | 349.0  |
| 17    | 4968.522  | 49.425  | 1186.2 |
| 18    | 4947.160  | 49.213  | 2434.1 |
| 19    | 4925.797  | 49.000  | 2529.8 |
| 20    | 4904.435  | 48.787  | 2306.7 |
| 21    | 4883.073  | 48.575  | 1207.1 |
| 22    | 4861.710  | 48.362  | 362.7  |
| 23    | 4284.165  | 42.617  | 49.7   |
| 24    | 4069.016  | 40.477  | 46.6   |
| 25    | 3762.315  | 37.426  | 49.0   |
| 26    | 3562.424  | 35.438  | 44.2   |
| 27    | 3521.226  | 35.028  | 37.7   |
| 28    | 3321.336  | 33.039  | 68.9   |
| 29    | 2904.771  | 28.896  | 49.1   |
| 30    | 2631.638  | 26.179  | 56.3   |
| 31    | 2382.920  | 23.704  | 74.7   |
| 32    | 1899.979  | 18.900  | 64.0   |
| 33    | 1449.082  | 14.415  | 67.4   |
| 34    | 1196.549  | 11.903  | 42.5   |
| 35    | 904.343   | 8.996   | 39.7   |

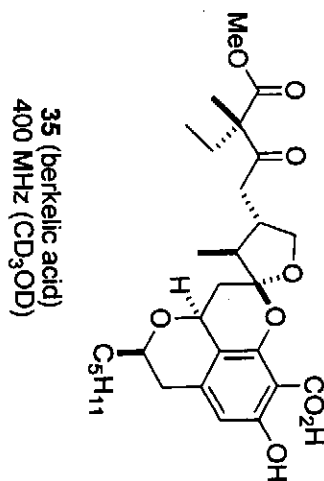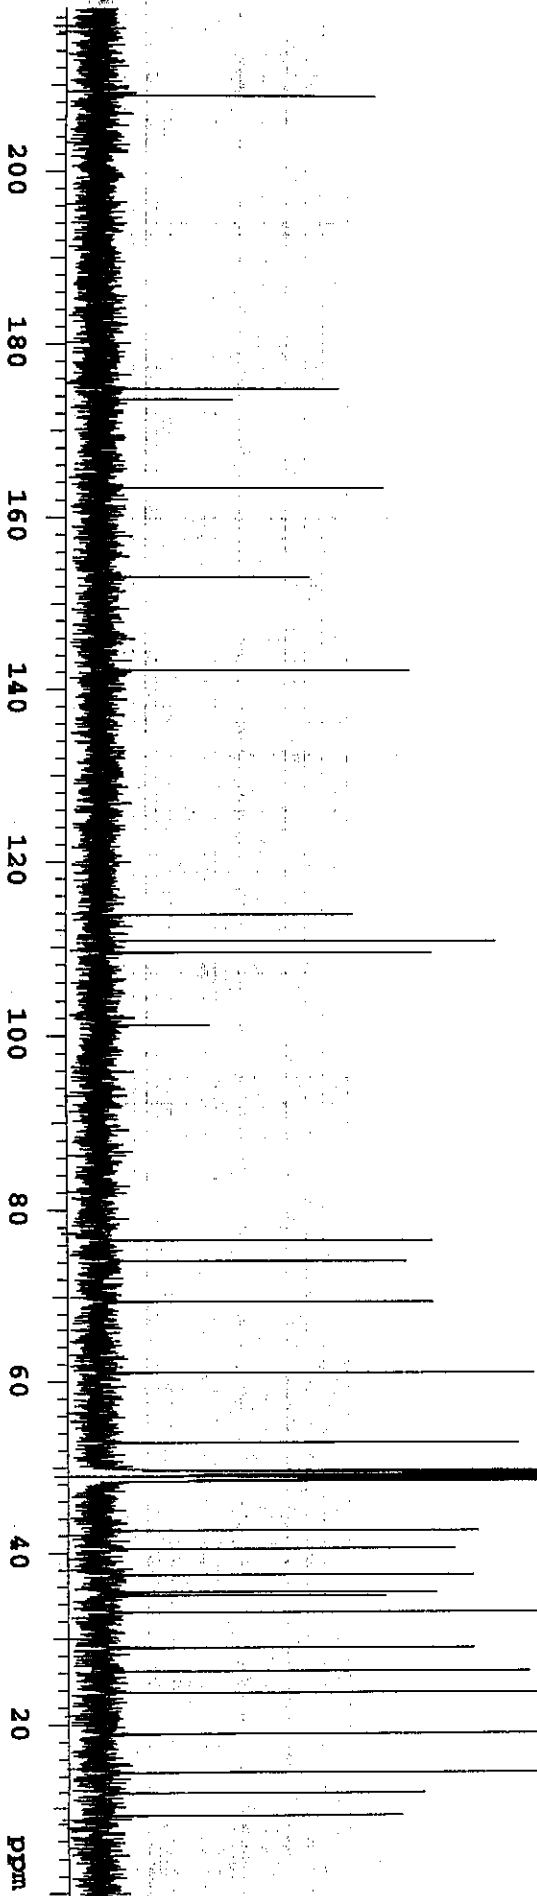

WXX-11-23-6

Pulse Sequence: szpul

Solvent: CDCl<sub>3</sub>

Ambient temperature

File: WXX-11-23-6

INOVA-500 "gambler"

Pulse 46.1 degrees

Acq. time 1.638 sec

Width 8000.0 Hz

18 repetitions

OBSERVE F1, 399.7857971 MHz

DATA PROCESSING

F1 size 32768

Total time 3 min, 31 sec

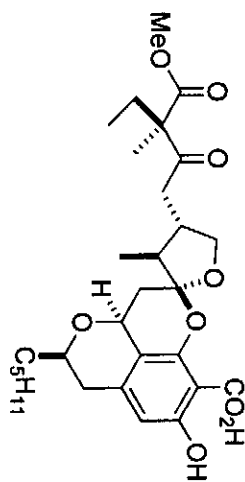

36 (22-epi-berkelic acid)  
400 MHz (CDCl<sub>3</sub>)

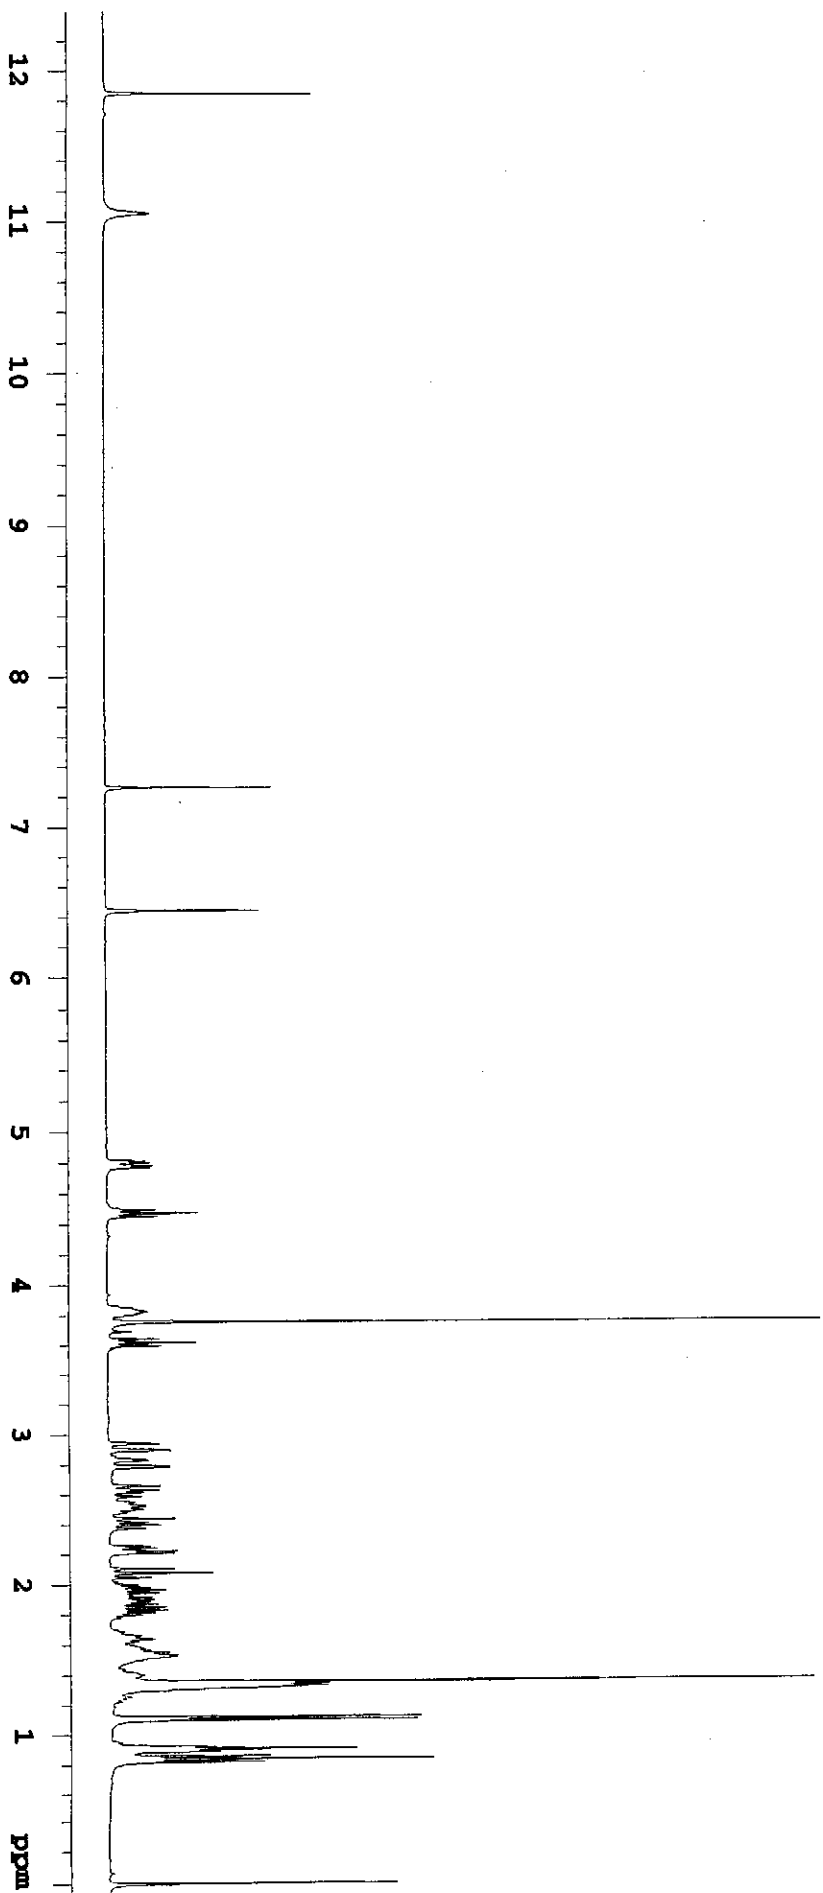

NR-11-23-6C in CDCl<sub>3</sub>

| INDEX | FREQUENCY | PPM     | HEIGHT |
|-------|-----------|---------|--------|
| 1     | 20705.149 | 205.968 | 14.9   |
| 2     | 17137.644 | 170.479 | 22.2   |
| 3     | 16338.847 | 162.533 | 26.9   |
| 4     | 15055.583 | 149.768 | 22.7   |
| 5     | 14295.695 | 142.209 | 30.5   |
| 6     | 11274.455 | 112.154 | 48.6   |
| 7     | 11108.134 | 110.500 | 53.2   |
| 8     | 9914.897  | 98.630  | 19.9   |
| 9     | 7772.563  | 77.319  | 331.6  |
| 10    | 7740.519  | 77.060  | 353.3  |
| 11    | 7708.476  | 76.681  | 350.7  |
| 12    | 7560.465  | 75.209  | 63.8   |
| 13    | 7389.567  | 73.509  | 48.9   |
| 14    | 6760.142  | 67.248  | 52.3   |
| 15    | 6004.069  | 59.726  | 34.9   |
| 16    | 5277.751  | 52.501  | 52.8   |
| 17    | 4846.690  | 48.213  | 63.1   |
| 18    | 4176.066  | 41.542  | 56.4   |
| 19    | 3954.814  | 39.341  | 63.2   |
| 20    | 3643.534  | 36.245  | 59.0   |
| 21    | 3448.222  | 34.302  | 88.3   |
| 22    | 3191.874  | 31.752  | 61.4   |
| 23    | 2799.723  | 27.851  | 49.3   |
| 24    | 2515.910  | 25.027  | 67.7   |
| 25    | 2371.006  | 22.591  | 63.5   |
| 26    | 1843.760  | 18.341  | 57.7   |
| 27    | 1411.173  | 14.038  | 58.4   |
| 28    | 1206.706  | 12.004  | 55.1   |
| 29    | 866.435   | 8.619   | 41.3   |
| 30    | -1.790    | -0.018  | 13.4   |

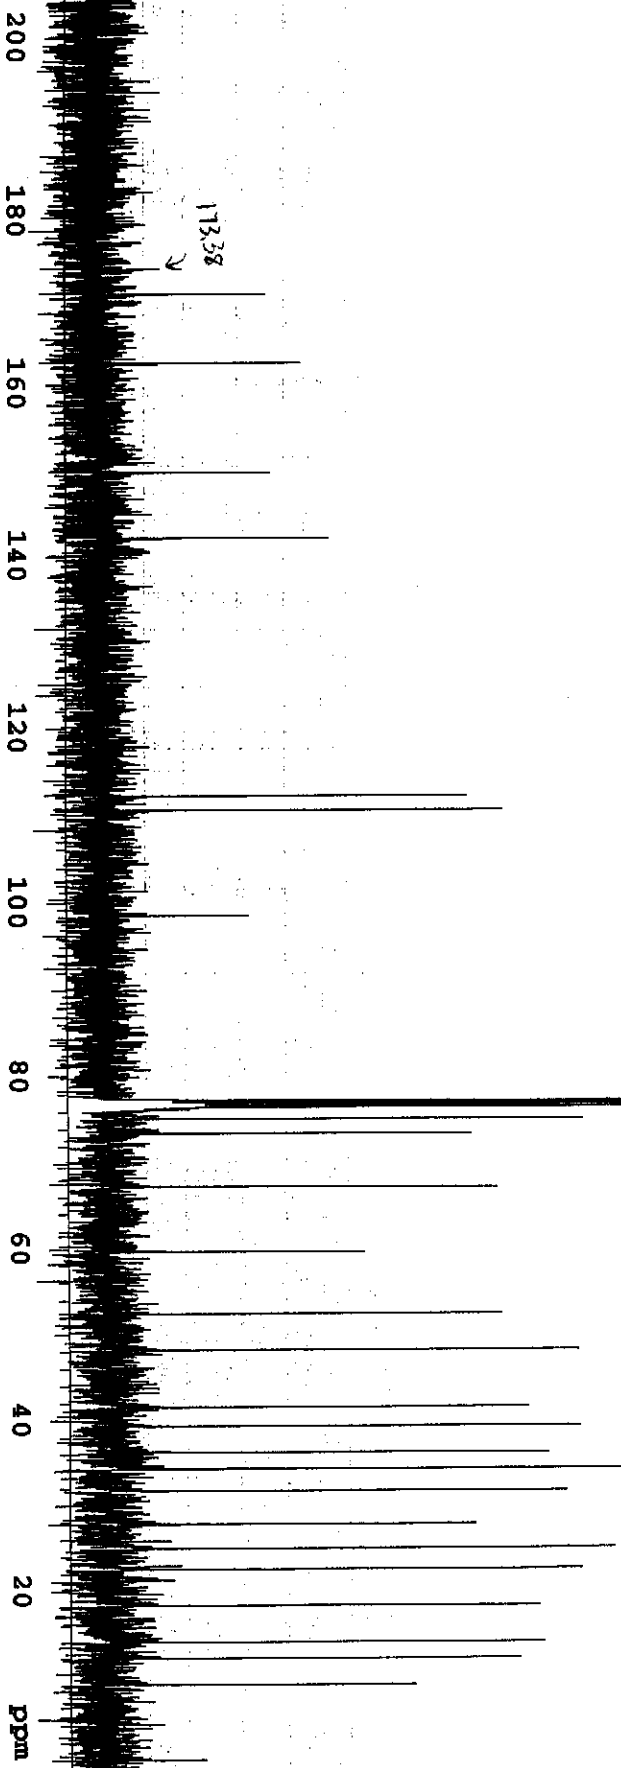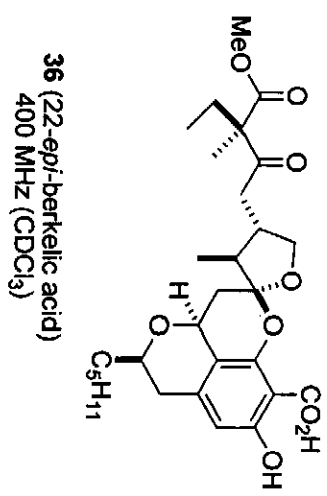

WCK-11-23-6-CD3OD - 500M

Pulse Sequence: s2pu1

Solvent: CD3OD

Temp. 25.0 C / 298.1 K

INOVN-500 "echo"

Pulse 47.4 degrees

Acq. time 1.892 sec

Width 8000.0 Hz

28 repetitions

OBSERVE H1, 499.8040901 MHz

DATA PROCESSING

F1 size 32768

Total time 4 min, 3 sec

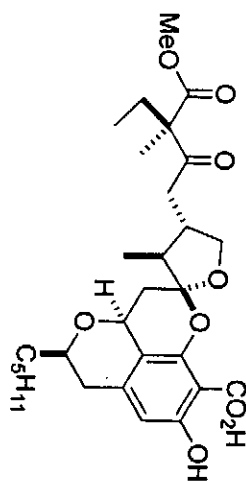

**36** (22-epi-berkelic acid)  
500 MHz (CD<sub>3</sub>OD)

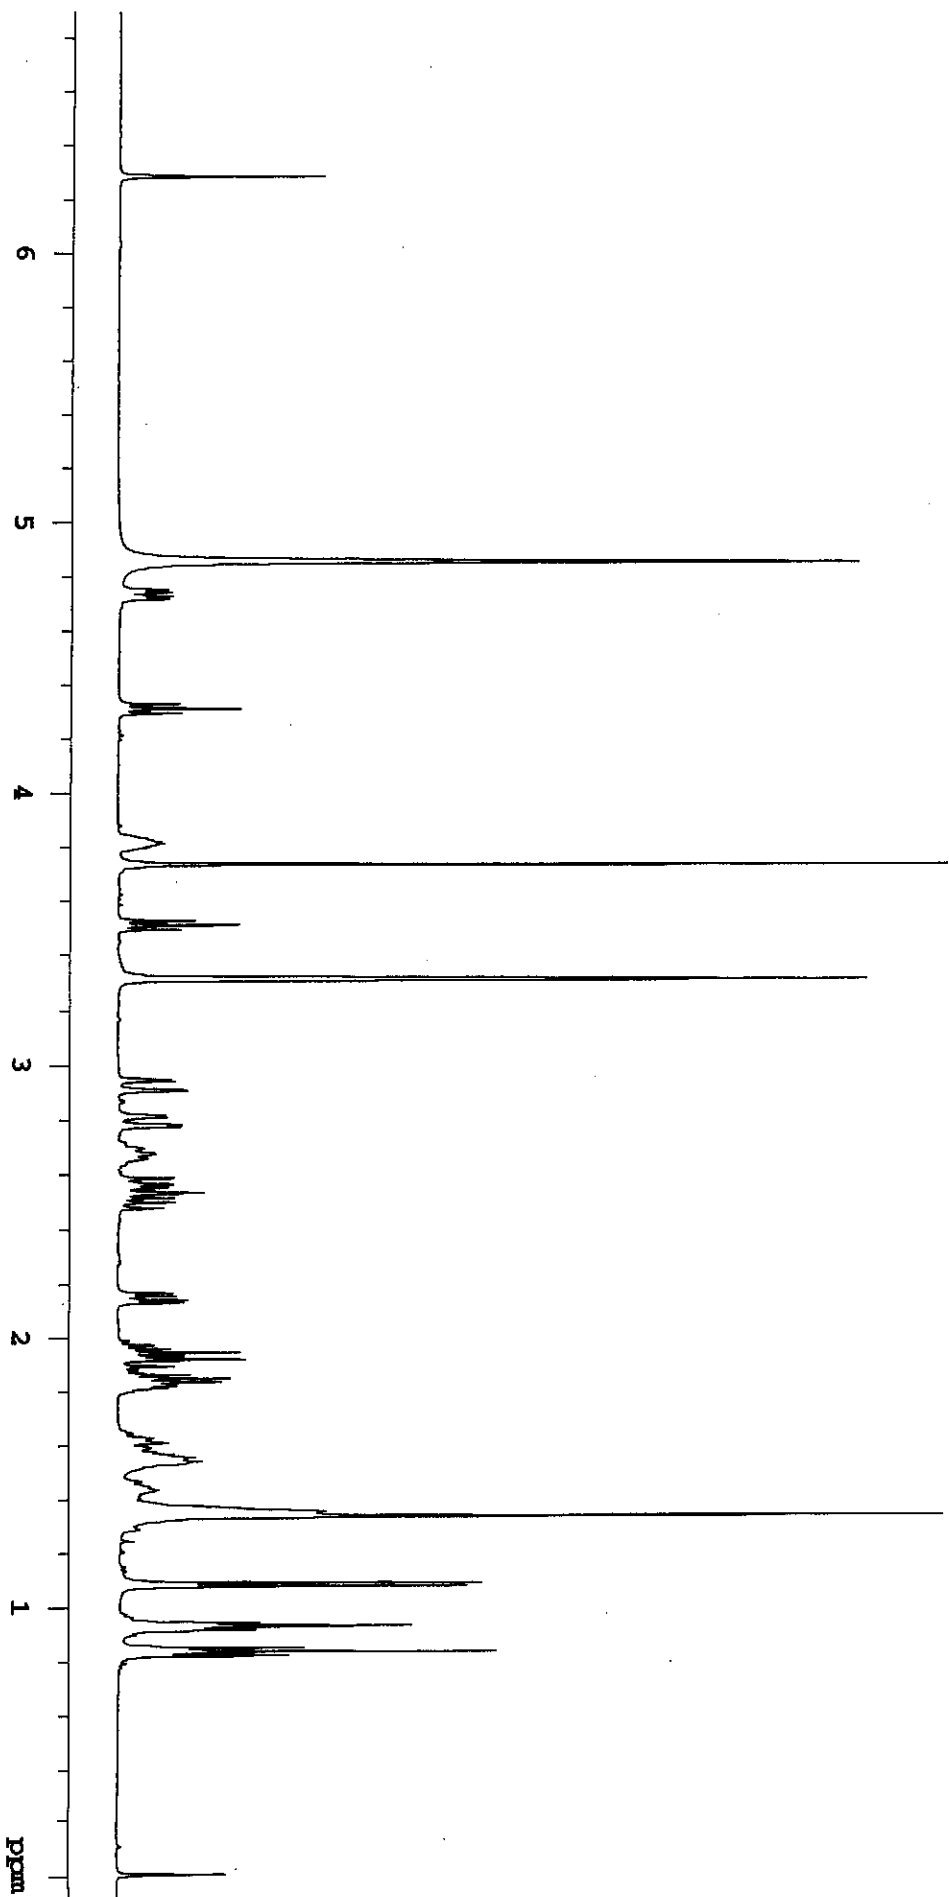

WX-11-23-6-CD3OD-C

| INDEX | FREQUENCY | PPM     | HEIGHT |
|-------|-----------|---------|--------|
| 1     | 20984.147 | 208.742 | 36.2   |
| 2     | 17576.096 | 174.840 | 32.8   |
| 3     | 17456.315 | 173.649 | 19.0   |
| 4     | 16424.058 | 163.380 | 28.1   |
| 5     | 15387.986 | 153.074 | 29.7   |
| 6     | 14303.849 | 142.289 | 39.0   |
| 7     | 11435.960 | 113.761 | 37.3   |
| 8     | 11132.310 | 110.740 | 49.6   |
| 9     | 10992.692 | 109.351 | 42.1   |
| 10    | 10167.191 | 101.139 | 17.1   |
| 11    | 7695.267  | 76.550  | 38.6   |
| 12    | 7452.653  | 74.136  | 33.7   |
| 13    | 6985.734  | 69.491  | 38.2   |
| 14    | 6135.056  | 61.029  | 54.6   |
| 15    | 5313.371  | 52.855  | 54.4   |
| 16    | 4989.884  | 49.638  | 474.1  |
| 17    | 4975.388  | 49.493  | 18.2   |
| 18    | 4968.522  | 49.425  | 1288.7 |
| 19    | 4947.160  | 49.213  | 2735.5 |
| 20    | 4925.797  | 49.000  | 3350.9 |
| 21    | 4904.435  | 48.787  | 2397.6 |
| 22    | 4882.310  | 48.567  | 1169.6 |
| 23    | 4860.947  | 48.355  | 431.6  |
| 24    | 4282.639  | 42.602  | 47.5   |
| 25    | 4066.727  | 40.454  | 51.2   |
| 26    | 3761.552  | 37.419  | 50.1   |
| 27    | 3561.662  | 35.430  | 45.6   |
| 28    | 3520.463  | 35.020  | 32.1   |
| 29    | 3320.573  | 33.032  | 70.5   |
| 30    | 2898.667  | 28.835  | 46.0   |
| 31    | 2631.638  | 26.179  | 54.7   |
| 32    | 2382.920  | 23.704  | 64.6   |
| 33    | 1887.009  | 18.771  | 50.9   |
| 34    | 1448.319  | 14.407  | 64.3   |
| 35    | 1195.786  | 11.895  | 48.6   |
| 36    | 899.003   | 8.943   | 39.4   |

36 (22-*epi*-berkelic acid)  
400 MHz (CD<sub>3</sub>OD)

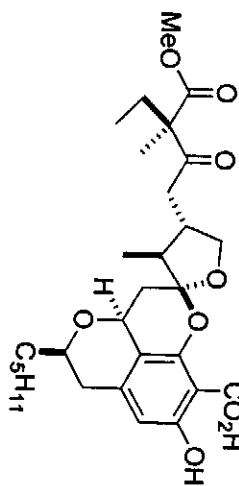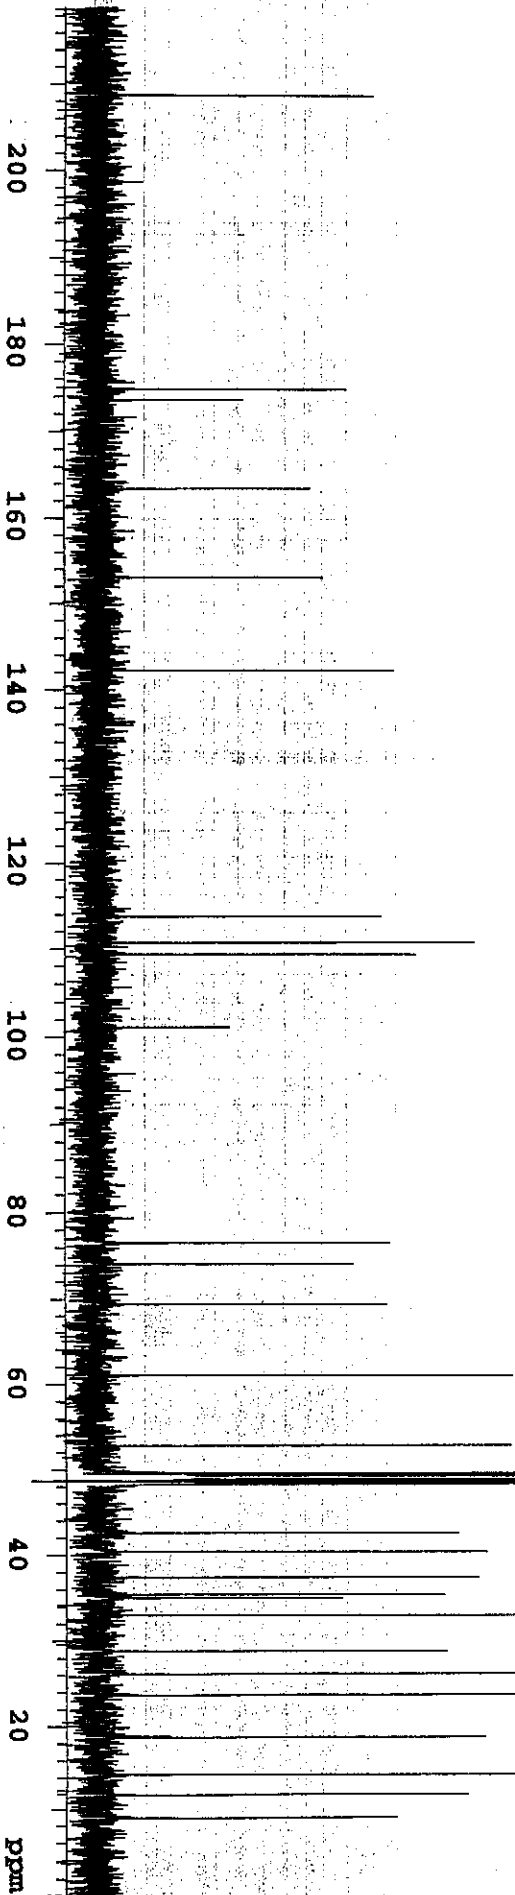

Supplement: NIHMS93744-supplement-supporting_mat.pdf [file NIHMS93744-supplement-supporting_mat.pdf]
